# Supplementary material for: Huayu Jiedu Fang Protects Ovarian Function in Mouse with Endometriosis Iron Overload by Inhibiting Ferroptosis
Source: Hindawi journal article supplement (doi:10.1155/2022/1406820), 2022-08-30
Supplement: f1 [file 1406820.f1.pdf]

|                                                     |   |   |   |   |
|-----------------------------------------------------|---|---|---|---|
| 3,4,5-trimethoxycinnamic acid                       | 0 | 0 | 1 | 0 |
| Rhamnetin                                           | 0 | 1 | 0 | 0 |
| Scutellarein                                        | 1 | 1 | 1 | 1 |
| Bergapten/Heraclin                                  | 1 | 0 | 1 | 0 |
| Astragalin                                          | 1 | 1 | 0 | 0 |
| phellopterin                                        | 0 | 0 | 1 | 0 |
| -dihydroxy-1,4a-dimethyl-2-oxo-7-propan-2-yl-10,10  | 1 | 0 | 0 | 0 |
| inermin                                             | 0 | 0 | 0 | 0 |
| Bullatine A                                         | 0 | 0 | 0 | 0 |
| Eupafolin                                           | 1 | 1 | 1 | 1 |
| L-Proline                                           | 0 | 0 | 0 | 1 |
| Naringenin                                          | 1 | 1 | 1 | 1 |
| Maltol                                              | 0 | 0 | 0 | 0 |
| Isoquercitrin                                       | 0 | 1 | 0 | 0 |
| alpha-Cyperone                                      | 1 | 0 | 0 | 0 |
| Arctigenin                                          | 0 | 0 | 0 | 1 |
| Biochanin A                                         | 1 | 0 | 0 | 1 |
| Morin                                               | 0 | 0 | 0 | 0 |
| 4S,5S,6R)-3,4,5-trihydroxy-6-(hydroxymethyl)oxan-   | 1 | 0 | 0 | 1 |
| Curdione                                            | 1 | 1 | 1 | 0 |
| L-Ornithine                                         | 0 | 0 | 0 | 1 |
| Atractylenolide II                                  | 1 | 0 | 1 | 1 |
| Chrysin                                             | 1 | 0 | 0 | 0 |
| Vitamin D3                                          | 1 | 1 | 0 | 1 |
| ydroxy-2-(4-hydroxyphenyl)-7-methoxy-2,3-dihydr     | 1 | 0 | 0 | 0 |
| Sauchinone                                          | 0 | 0 | 0 | 0 |
| Demethoxycurcumin                                   | 1 | 0 | 1 | 1 |
| Wilforlide A                                        | 0 | 0 | 1 | 0 |
| Dehydrocostus lactone                               | 1 | 0 | 0 | 0 |
| Apiin                                               | 0 | 0 | 1 | 1 |
| Musk ketone                                         | 0 | 0 | 0 | 1 |
| L-Isoleucine                                        | 1 | 1 | 1 | 0 |
| Flavanone base +2O, 1MeO                            | 0 | 0 | 1 | 0 |
| p-Coumaric acid                                     | 1 | 1 | 0 | 1 |
| (+)-Nootkatone                                      | 1 | 1 | 1 | 1 |
| Adenine                                             | 0 | 1 | 0 | 0 |
| L-Valine                                            | 1 | 1 | 1 | 1 |
| Cholic acid                                         | 1 | 1 | 0 | 1 |
| alpha-Linolenic acid                                | 1 | 1 | 1 | 0 |
| Chlorogenic acid                                    | 0 | 0 | 0 | 0 |
| Methionine                                          | 0 | 0 | 0 | 0 |
| isoimperatorin                                      | 0 | 0 | 1 | 0 |
| Myricetin                                           | 1 | 0 | 0 | 0 |
| Isofraxidin                                         | 0 | 0 | 0 | 0 |
| n-1(3H)-one, 4,4a,5,6,7,7a,8,9-octahydro-4,8-dihydr | 0 | 0 | 0 | 0 |
| Tyrosine                                            | 1 | 1 | 1 | 1 |
| Demethylwedelolactone                               | 0 | 0 | 0 | 0 |
| (2-hydroxypropan-2-yl)-7-methyl-2,3-dihydrofuro[3,2 | 0 | 0 | 0 | 0 |
| Vitamin D2                                          | 1 | 1 | 0 | 1 |
| Herbacetin                                          | 0 | 0 | 0 | 0 |
| 7,4'-DIMETHOXYISOFLAVONE                            | 0 | 1 | 0 | 0 |

|                                                       |   |   |   |   |
|-------------------------------------------------------|---|---|---|---|
| Ammothamnine                                          | 0 | 0 | 0 | 0 |
| Oroxin B                                              | 1 | 0 | 0 | 1 |
| etyloxy)methyl]-1-(beta-D-glucopyranosyloxy)-1,4a,    | 0 | 0 | 1 | 0 |
| (+)-Magnoflorine                                      | 1 | 0 | 0 | 0 |
| Isoalantolactone                                      | 0 | 0 | 0 | 0 |
| Isoanhydroicaritin                                    | 1 | 0 | 0 | 1 |
| 4-Guanidinobutyric acid                               | 1 | 0 | 1 | 1 |
| GALACTITOL                                            | 1 | 1 | 1 | 0 |
| Asiatic acid                                          | 0 | 0 | 1 | 0 |
| Esculetin                                             | 1 | 1 | 0 | 0 |
| Choline [M]+                                          | 1 | 1 | 1 | 1 |
| 5R)-12,15-dihydroxy-7-methyl-8-oxabicyclo[11.3.0]     | 1 | 1 | 1 | 1 |
| Tectochrysin                                          | 0 | 0 | 0 | 1 |
| 4-Methylesculetin                                     | 1 | 0 | 0 | 1 |
| Quercetin-3-O-glucoside                               | 1 | 0 | 0 | 0 |
| Linoleic acid                                         | 1 | 1 | 1 | 1 |
| Isorhamnetin-3-O-nehesperidine                        | 1 | 1 | 1 | 0 |
| Emodin                                                | 0 | 0 | 0 | 0 |
| beta-Elemonic acid                                    | 0 | 0 | 0 | 1 |
| eudesmin                                              | 0 | 0 | 1 | 1 |
| Pinocembrin                                           | 1 | 0 | 0 | 1 |
| carbonyl-1,2,3,4a,5,6,7,8,9,10,12,12a,14,14a-tetradec | 0 | 0 | 1 | 0 |
| Benzamide                                             | 1 | 1 | 1 | 1 |
| 6-Hydroxyindole                                       | 0 | 0 | 0 | 1 |
| alpha-Boswellic acid                                  | 0 | 0 | 1 | 0 |
| Scoparone                                             | 0 | 0 | 0 | 0 |
| cynaropicrin                                          | 0 | 0 | 1 | 0 |
| H)-dione, 3a,7,7a,8,9,9a-hexahydro-5,8-dimethyl-3-n   | 0 | 0 | 0 | 0 |
| Artemisinic acid                                      | 1 | 0 | 1 | 1 |
| (5xi,9xi,10alpha)-Kaur-16-en-18-oic acid              | 0 | 0 | 1 | 0 |
| Cinnamamide                                           | 0 | 0 | 0 | 0 |
| Dehydroevodiamine                                     | 0 | 0 | 0 | 0 |
| Kaempferol 3-glucorhamnoside                          | 1 | 1 | 1 | 0 |
| Pilocarpine                                           | 0 | 0 | 0 | 0 |
| i,6a,7a,8,9,9a-octahydrobisoxireno[4,5:8,9]cyclodeca  | 0 | 0 | 0 | 0 |
| Cinnamaldehyde                                        | 0 | 0 | 1 | 0 |
| Plumericin                                            | 0 | 0 | 0 | 0 |
| Eriodictyol                                           | 1 | 0 | 1 | 1 |
| Sophoricoside                                         | 0 | 0 | 0 | 1 |
| Isosteviol                                            | 0 | 0 | 0 | 0 |
| 2-Hydroxyacetophenone                                 | 1 | 1 | 1 | 0 |
| Lutl-6-C-Glc                                          | 1 | 1 | 0 | 1 |
| Taxifolin                                             | 1 | 0 | 0 | 0 |
| Afzelin                                               | 1 | 1 | 0 | 1 |
| Glyceryl linolenate                                   | 0 | 1 | 1 | 1 |
| Typhaneoside                                          | 1 | 1 | 0 | 1 |
| 3,5S,6R)-3,4,5-trihydroxy-6-(hydroxymethyl)oxan-2-    | 0 | 0 | 0 | 0 |
| 3-Pyridinemethanol                                    | 1 | 1 | 1 | 1 |
| Daidzein                                              | 0 | 0 | 0 | 0 |
| Caffeic acid                                          | 1 | 0 | 0 | 0 |
| Hyperoside                                            | 1 | 1 | 1 | 1 |

|                                                      |   |   |   |   |
|------------------------------------------------------|---|---|---|---|
| Tectoridin                                           | 1 | 0 | 0 | 0 |
| Hydroprotopine                                       | 1 | 0 | 0 | 1 |
| Guanine                                              | 1 | 1 | 1 | 1 |
| Delsoline                                            | 0 | 1 | 0 | 0 |
| Isoflavone base + 3O                                 | 1 | 0 | 0 | 1 |
| Clareolide                                           | 1 | 1 | 0 | 0 |
| monoolein                                            | 0 | 1 | 0 | 0 |
| Neostigmine bromide                                  | 0 | 1 | 0 | 0 |
| Ferulic acid                                         | 0 | 1 | 0 | 0 |
| 7-trimethyl-3,4,4b,5,6,9,10,10a-octahydro-2H-phenan  | 0 | 1 | 0 | 0 |
| Flemiphilippinin A                                   | 1 | 0 | 0 | 0 |
| Acetyl-11-keto-beta-boswellic acid                   | 0 | 0 | 0 | 0 |
| Nicotinamide                                         | 1 | 0 | 0 | 1 |
| 3,4-Dimethoxybenzaldehyde                            | 1 | 1 | 1 | 1 |
| Coniferin                                            | 1 | 1 | 1 | 1 |
| Grosvenorine                                         | 1 | 1 | 0 | 0 |
| 2"-O-beta-L-galactopyranosylorientin                 | 1 | 1 | 0 | 1 |
| Coumaric acid                                        | 1 | 1 | 1 | 0 |
| Sterigmatocystin                                     | 1 | 0 | 0 | 0 |
| Sissotrine                                           | 1 | 0 | 0 | 1 |
| Rosarin                                              | 1 | 0 | 1 | 0 |
| Isobergapten                                         | 1 | 0 | 0 | 0 |
| judaicin (eudesmane naphthofuran)                    | 1 | 0 | 0 | 0 |
| Ursonic acid                                         | 0 | 1 | 0 | 0 |
| aflatoxin B1                                         | 1 | 0 | 0 | 0 |
| Arachidonic acid (not validated)                     | 0 | 0 | 0 | 0 |
| (+)-Cannabidiol                                      | 0 | 0 | 0 | 0 |
| Cafestol                                             | 1 | 1 | 1 | 1 |
| Pyocyanin                                            | 0 | 0 | 0 | 0 |
| droxymethyl)-1,2,6a,6b,9,12a-hexamethyl-2,3,4,5,6,6  | 0 | 0 | 1 | 0 |
| Ephedrine                                            | 0 | 0 | 0 | 0 |
| kaempferol 7-neohesperidoside                        | 1 | 1 | 1 | 1 |
| 7,8-Dihydroxyflavone                                 | 0 | 0 | 0 | 0 |
| †,14a-tetradecahydropicen-3-yl]oxy]-5-[(2S,3R,4S,5R  | 1 | 1 | 0 | 1 |
| Paeoniflorin                                         | 1 | 0 | 0 | 0 |
| (3,4,5-trihydroxybenzoyl)oxyoxan-2-yl]methyl 3,4,5-  | 1 | 0 | 0 | 0 |
| 4-AMINOBUTANOIC ACID                                 | 0 | 1 | 0 | 1 |
| ymethyl)-2,2,6a,6b,9,12a-hexamethyl-1,3,4,5,6,6a,7,8 | 1 | 0 | 0 | 0 |
| Valine                                               | 0 | 0 | 0 | 1 |
| ALLOMATRINE 1N-OXIDE                                 | 0 | 0 | 0 | 0 |
| Praeruptorin A                                       | 0 | 0 | 1 | 0 |
| 2,3-dihydroxypropyl hexadecanoate                    | 1 | 0 | 0 | 0 |
| Ononin                                               | 1 | 0 | 0 | 0 |
| Homoplantagin                                        | 1 | 1 | 0 | 0 |
| Oleanonic acid                                       | 1 | 0 | 0 | 0 |
| Lindenenol                                           | 1 | 1 | 1 | 1 |
| Glabrolide                                           | 0 | 0 | 0 | 0 |
| ,6,10-trimethyl-7,8,11,11a-tetrahydrocyclodeca[b]fur | 0 | 0 | 0 | 0 |
| Phenylacetaldehyde                                   | 1 | 1 | 1 | 0 |
| Isatin                                               | 0 | 0 | 0 | 0 |
| Flavone                                              | 1 | 0 | 0 | 0 |

|                                                                                                           |   |   |   |   |
|-----------------------------------------------------------------------------------------------------------|---|---|---|---|
| licochalcone B                                                                                            | 1 | 0 | 0 | 0 |
| Fraxetin                                                                                                  | 0 | 0 | 0 | 0 |
| Benzoic acid                                                                                              | 0 | 0 | 1 | 0 |
| γ-2,3-dihydro-7h-furo[3,2-g]chromen-2-yl]propan-2-yl                                                      | 0 | 0 | 0 | 0 |
| 5-trimethoxyphenyl)-5a,6,8a,9-tetrahydro-5H-[2]benz                                                       | 1 | 0 | 0 | 0 |
| 3-Formylindole                                                                                            | 1 | 1 | 1 | 1 |
| Abietic acid                                                                                              | 1 | 0 | 1 | 1 |
| Leucoside                                                                                                 | 1 | 1 | 1 | 1 |
| NEPSILON,NEPSILON,NEPSILON-TRIMETHYLLYS                                                                   | 0 | 1 | 0 | 1 |
| Germacrone                                                                                                | 0 | 1 | 1 | 0 |
| Skimmin                                                                                                   | 0 | 0 | 1 | 0 |
| Deoxyvasicinone                                                                                           | 0 | 1 | 0 | 1 |
| Anhydroicaritin                                                                                           | 0 | 0 | 0 | 0 |
| Kojic Acid                                                                                                | 0 | 0 | 1 | 0 |
| Corosolic acid                                                                                            | 0 | 1 | 1 | 0 |
| 20(R)-Protopanaxdiol                                                                                      | 0 | 0 | 0 | 0 |
| N-Acetyl-DL-glutamic acid                                                                                 | 1 | 0 | 0 | 1 |
| -yl] (3aS,6Z,10E,11aR)-10-methyl-3-methylidene-2-yl                                                       | 0 | 0 | 0 | 1 |
| Eicosapentaenoic acid                                                                                     | 0 | 0 | 1 | 0 |
| Deacetylasperulosidic acid                                                                                | 0 | 1 | 0 | 0 |
| Shanzhiside methyl ester                                                                                  | 0 | 1 | 0 | 0 |
| Cinchonidine                                                                                              | 0 | 0 | 0 | 0 |
| 18 beta-Glycyrrhetintic Acid                                                                              | 0 | 0 | 0 | 0 |
| Linolenic acid ethyl ester                                                                                | 0 | 1 | 0 | 0 |
| 5b,9,9,12a-heptamethyl-2,3,4,5,6,6a,7,8,8a,10,11,12,1                                                     | 1 | 0 | 1 | 0 |
| yltetracyclo[11.2.1.0 <sup>1</sup> , <sup>10</sup> .0 <sup>4</sup> , <sup>9</sup> ]hexadecane-5,14-dicarb | 1 | 1 | 1 | 1 |
| Rutin                                                                                                     | 0 | 1 | 0 | 1 |
| hydroxymethyl)-2,2,6a,6b,9,12a-hexamethyl-1,3,4,5,6,                                                      | 1 | 1 | 1 | 1 |
| Quercetin 3-O-beta-D-Glucuronide                                                                          | 1 | 0 | 0 | 0 |
| (2E,4E)-N-(2-methylpropyl)deca-2,4-dienamide                                                              | 1 | 1 | 0 | 0 |
| (+)-Catechin hydrate                                                                                      | 0 | 0 | 0 | 0 |
| Lupenone                                                                                                  | 0 | 1 | 1 | 0 |
| γ-2,2,6a,6b,9,9,12a-heptamethyl-1,3,4,5,6,6a,7,8,8a,                                                      | 0 | 0 | 1 | 0 |
| Oroxylin A-7-O-beta-D-glucuronide                                                                         | 0 | 0 | 0 | 0 |
| Harmol                                                                                                    | 0 | 0 | 0 | 0 |
| L-Tryptophan                                                                                              | 1 | 1 | 1 | 1 |
| Dihydroresveratrol                                                                                        | 0 | 0 | 1 | 0 |
| Isochlorogenic acid C                                                                                     | 1 | 0 | 0 | 1 |
| rhodioloside                                                                                              | 1 | 0 | 1 | 0 |
| Betulin                                                                                                   | 0 | 0 | 1 | 0 |
| alpha-Hederin                                                                                             | 0 | 1 | 0 | 0 |
| Asperphenamate_120258                                                                                     | 1 | 0 | 1 | 1 |
| Docosahexaenoic acid                                                                                      | 0 | 0 | 0 | 1 |
| Pyridoxine                                                                                                | 1 | 1 | 1 | 1 |
| out-2-enyl)-7-[(2S,3R,4S,5S,6R)-3,4,5-trihydroxy-6-(                                                      | 1 | 0 | 1 | 1 |
| Coumaroyl tyramine                                                                                        | 1 | 0 | 1 | 0 |
| -1,2,6a,6b,9,9,12a-heptamethyl-2,3,4,5,6,6a,7,8,8a,10                                                     | 1 | 0 | 0 | 1 |
| Diethyltoluamide                                                                                          | 0 | 0 | 0 | 0 |
| (5S)-5-hydroxy-1,7-diphenylheptan-3-one                                                                   | 0 | 0 | 0 | 1 |
| Hyoscyamine                                                                                               | 0 | 0 | 0 | 0 |
| Phloroglucinol                                                                                            | 0 | 0 | 0 | 0 |

|                                                     |   |   |   |   |
|-----------------------------------------------------|---|---|---|---|
| droxy-6-(hydroxymethyl)oxan-2-yl]oxy-7-[(2S,3R,4I   | 1 | 1 | 0 | 1 |
| Propranolol                                         | 0 | 1 | 0 | 0 |
| propylidene-3,8-dimethyl-2,3,3a,4,5,8a-hexahydro-6  | 0 | 0 | 0 | 0 |
| Racanisodamine                                      | 1 | 0 | 1 | 0 |
| Curcumenol                                          | 1 | 1 | 0 | 0 |
| Phthalic anhydride                                  | 1 | 1 | 1 | 1 |
| hydroxyphenyl)-6,8-bis(3-methylbut-2-enyl)-2,3-dih  | 1 | 0 | 0 | 0 |
| trans-Zeatin-riboside                               | 0 | 0 | 1 | 0 |
| Diosgenin glucoside                                 | 1 | 0 | 0 | 0 |
| Coniferyl aldehyde                                  | 1 | 0 | 1 | 0 |
| Tauroursodeoxycholic acid                           | 0 | 0 | 0 | 1 |
| Cryptotanshinone                                    | 1 | 0 | 0 | 1 |
| Cimifugin                                           | 1 | 0 | 0 | 0 |
| Baohuoside I                                        | 1 | 0 | 0 | 0 |
| Acetophenone                                        | 0 | 1 | 0 | 0 |
| Flavonol base + 3O, O-Hex                           | 0 | 0 | 0 | 0 |
| L-Pyroglutamic acid                                 | 1 | 0 | 0 | 1 |
| Arbutin                                             | 1 | 0 | 0 | 0 |
| Securinine                                          | 0 | 0 | 0 | 1 |
| Coumarin                                            | 0 | 1 | 1 | 1 |
| Roburic acid                                        | 0 | 1 | 1 | 1 |
| Phenethylacetate                                    | 0 | 0 | 0 | 0 |
| ,22R)-4,27-Dihydroxy-5,6:22,26-diepoxyergosta-2,2'  | 0 | 1 | 0 | 0 |
| Talatisamine                                        | 1 | 1 | 1 | 1 |
| cuminyl alcohol                                     | 1 | 1 | 0 | 1 |
| APIGENIN DIMETHYL ETHER                             | 0 | 1 | 0 | 0 |
| Methyl trans-cinnamic acid                          | 1 | 1 | 0 | 1 |
| ta-D-glucopyranosyloxy)-8-hydroxy-1,5-dimethyl-6-   | 0 | 1 | 1 | 0 |
| 3a-hydroxy-2,5,8,8,12-pentamethyl-2,3,3a,4,5,8,9,10 | 0 | 0 | 0 | 1 |
| Higenamine                                          | 1 | 0 | 1 | 0 |
| Vanillic acid (not validated)                       | 1 | 0 | 1 | 0 |
| Pyroglutamic acid (not validated, isomer of 88)     | 0 | 0 | 0 | 1 |
| Ginkgolic acid C17-1                                | 1 | 0 | 0 | 1 |
| ADONITOL                                            | 0 | 0 | 0 | 0 |
| Kaempferol 3-O-sophoroside                          | 0 | 0 | 0 | 1 |
| Thymol                                              | 1 | 0 | 0 | 0 |
| hexen-1-one, 4-hydroxy-4-(3-hydroxybutyl)-3,5,5-tri | 0 | 0 | 0 | 1 |
| Pimara-9(11),15-dien-18-oic acid                    | 0 | 0 | 0 | 0 |
| 1-Monostearin                                       | 1 | 1 | 1 | 1 |
| Camelliaside B                                      | 0 | 1 | 0 | 0 |
| Isovanillic acid                                    | 0 | 1 | 1 | 1 |
| OBLIQUIN                                            | 0 | 0 | 0 | 0 |
| Byakangelicol                                       | 0 | 0 | 1 | 0 |
| Phenylalanine                                       | 1 | 1 | 1 | 1 |
| Tuberostemonine                                     | 0 | 1 | 0 | 1 |
| Carveol                                             | 1 | 0 | 1 | 1 |
| ,8-dimethyl-5-propan-2-ylidene-1,2,3a,4,7,8a-hexahy | 0 | 0 | 1 | 0 |
| dihydroxyphenyl)prop-2-enoyl]oxy}-1,3,5-trihydrox   | 0 | 0 | 0 | 0 |
| Isoleucine                                          | 0 | 1 | 0 | 0 |
| Karakoline                                          | 0 | 0 | 0 | 0 |
| Deoxynivalenol                                      | 0 | 0 | 0 | 0 |



|                                                                   |   |   |   |   |
|-------------------------------------------------------------------|---|---|---|---|
| Resibufogenin                                                     | 0 | 0 | 0 | 0 |
| N-Methyl-2-pyrrolidone                                            | 1 | 1 | 1 | 1 |
| 4-Phenyl-3-buten-2-one                                            | 0 | 0 | 0 | 0 |
| Flavone base + 3O, O-HexA                                         | 1 | 0 | 0 | 0 |
| ethylidene-6,18-dioxatricyclo[14.2.1.0 <sup>5,9</sup> ]nonadeca-3 | 0 | 0 | 0 | 0 |
| Kaempferol-3-O-glucoside-6"-p-coumaroyl                           | 1 | 0 | 0 | 0 |
| Procyanidin B1                                                    | 1 | 0 | 1 | 0 |
| 1,3-Dicaffeoylquinic acid                                         | 0 | 1 | 0 | 0 |
| Perillene                                                         | 0 | 1 | 0 | 0 |
| Mangiferin                                                        | 0 | 0 | 0 | 0 |
| Sulfuretin                                                        | 1 | 0 | 1 | 0 |
| Phenylpropanolamine                                               | 0 | 1 | 0 | 0 |
| Isochlorogenic acid B                                             | 1 | 0 | 0 | 0 |
| methoxyphenyl)methyl]-3-(hydroxymethyl)oxolan-2                   | 0 | 0 | 1 | 1 |
| Loliolide                                                         | 1 | 1 | 0 | 0 |
| Cytosine                                                          | 1 | 0 | 0 | 0 |
| Androsin                                                          | 0 | 0 | 1 | 0 |
| Adenosine monophosphate                                           | 0 | 1 | 0 | 1 |
| Oxysophocarpine                                                   | 0 | 0 | 0 | 0 |
| o-Anisic acid                                                     | 0 | 0 | 0 | 0 |
| Piperlongumine                                                    | 0 | 0 | 1 | 0 |
| Spermine                                                          | 0 | 0 | 0 | 0 |
| imethylhept-3-en-2-yl]-6,10-dimethyl-16,17-dioxaper               | 0 | 1 | 0 | 0 |
| (5xi,9xi)-12-Hydroxyabieta-7,13-dien-18-oic acid                  | 1 | 1 | 1 | 1 |
| Antheraxanthin                                                    | 1 | 0 | 0 | 0 |
| Methyl vanillate                                                  | 0 | 0 | 0 | 0 |
| [(2R,3R)-2,3,6-trihydroxy-6-methylheptan-2-yl]-2,3,4-             | 1 | 0 | 0 | 1 |
| Isophorone                                                        | 1 | 0 | 0 | 0 |
| 4-Androstene-3,17-dione                                           | 0 | 0 | 0 | 0 |
| Tyramine                                                          | 0 | 1 | 1 | 1 |
| [3,4,5-trihydroxy-6-[(3,4,5-trihydroxy-6-methyloxan-              | 1 | 0 | 0 | 0 |
| loganic acid                                                      | 1 | 1 | 1 | 1 |
| Demissidine                                                       | 0 | 1 | 0 | 1 |
| Psoralen                                                          | 0 | 0 | 0 | 0 |
| Meperidine                                                        | 1 | 0 | 0 | 0 |
| syringaresinol                                                    | 1 | 1 | 1 | 1 |
| p-Hydroxybenzaldehyde                                             | 0 | 0 | 0 | 0 |
| Echinocystic acid                                                 | 0 | 0 | 0 | 0 |
| oyl]oxyethylidene]-6-[(2S,3R,4S,5S,6R)-3,4,5-trihyd               | 0 | 1 | 1 | 0 |
| Foliosidine                                                       | 0 | 0 | 0 | 1 |
| ESTRADIOL                                                         | 1 | 1 | 0 | 1 |
| Esculentoside A                                                   | 0 | 0 | 1 | 0 |
| -dihydroxy-4-(hydroxymethyl)oxolan-2-yl]oxymethy                  | 0 | 0 | 0 | 0 |
| Dubinidine                                                        | 1 | 0 | 1 | 1 |
| Lupinine                                                          | 0 | 1 | 0 | 1 |
| Dihydroartemisinic acid                                           | 1 | 1 | 1 | 1 |
| droxy-7,8-dimethoxy-2-phenyl-2,3-dihydrochromen-4                 | 1 | 0 | 1 | 0 |
| Gentiopicroside                                                   | 0 | 0 | 0 | 0 |
| (-)-Huperzine A                                                   | 0 | 0 | 0 | 0 |
| 2-enoyloxy)-2-oxo-9,10-dihydropyrano[2,3-f]chrome                 | 1 | 0 | 1 | 0 |
| Ruscogenin                                                        | 0 | 0 | 0 | 0 |



|                                                      |   |   |   |   |
|------------------------------------------------------|---|---|---|---|
| 6-methoxy-7-(3-methylbut-2-enoxy)chromen-2-one       | 0 | 0 | 0 | 1 |
| Methyltestosterone                                   | 1 | 0 | 0 | 0 |
| suberosin                                            | 1 | 0 | 1 | 1 |
| Beta-Caryophyllene Alcohol                           | 0 | 1 | 1 | 0 |
| Protocatechualdehyde                                 | 1 | 1 | 1 | 1 |
| Silibinin                                            | 0 | 0 | 0 | 0 |
| 2,3,6,7,8,8a-hexahydropyrrolo[1,2-a]pyrazine-1       | 0 | 1 | 0 | 1 |
| Dihomo- $\gamma$ -linolenic acid (DGLA; cis-20:3n-6) | 0 | 0 | 0 | 0 |
| Hydroxyvalerenic Acid                                | 0 | 1 | 0 | 1 |
| Ethylparaben                                         | 0 | 0 | 0 | 0 |
| Hecogenin                                            | 0 | 0 | 0 | 1 |
| Dibutylphthalate                                     | 1 | 0 | 1 | 1 |
| Acetylcholine                                        | 0 | 1 | 0 | 0 |
| 1a,3,6,10a-tetrahydrooxireno[4,5]cyclodeca[1         | 1 | 1 | 1 | 1 |
| Isoastragaloside I                                   | 1 | 1 | 1 | 1 |
| Epicatechin                                          | 1 | 1 | 1 | 0 |
| hydroxy-9-(hydroxymethyl)-2,6a,6b,9,12a-pentameth    | 0 | 0 | 1 | 0 |
| Petunidin-3-O-beta-glucopyranoside                   | 1 | 1 | 1 | 1 |
| d, 7-ethenyl-1,2,3,4,4a,4b,5,6,7,9,10,10a-dodecahydr | 0 | 0 | 0 | 1 |
| y-5-[(Z)-2-(4-hydroxyphenyl)ethenyl]phenoxy]-6-(hy   | 0 | 1 | 1 | 1 |
| Desoxypeganine                                       | 0 | 0 | 0 | 0 |
| -dihydroxy-16-methyl-2,4,14,19-tetraoxahexacyclo[8   | 1 | 0 | 0 | 0 |
| Irinotecan hydrochloride                             | 0 | 0 | 0 | 1 |
| Sorbitol                                             | 0 | 1 | 1 | 0 |
| isopropylidene-3,8-dimethyl-2,3,3a,4,5,8a-hexahydro  | 0 | 1 | 0 | 0 |
| 1,7-bis(4-hydroxyphenyl)heptan-3-one                 | 0 | 0 | 0 | 0 |
| Polygalic acid                                       | 0 | 0 | 0 | 0 |
| Auraptene                                            | 1 | 0 | 0 | 0 |
| Lawsone                                              | 0 | 0 | 0 | 0 |
| R,4S,5S,6R)-3,4,5-trihydroxy-6-(hydroxymethyl)oxa    | 1 | 0 | 1 | 0 |
| Procyanidin B2                                       | 1 | 0 | 0 | 0 |
| Quercetin-3-D-xyloside                               | 0 | 1 | 0 | 0 |
| propyl)-2,3,6,7,8,8a-hexahydropyrrolo[1,2-a]pyrazin  | 0 | 0 | 0 | 0 |
| Acacetin-7-O-neohesperidoside                        | 1 | 0 | 1 | 1 |
| Lysionotin                                           | 0 | 0 | 0 | 1 |
| Biochanin-7-O-glucoside                              | 0 | 0 | 0 | 1 |
| Taurocholic acid sodium salt hydrate                 | 0 | 0 | 0 | 0 |
| AGMATINE SULFATE                                     | 1 | 1 | 1 | 1 |
| ASPARTATE                                            | 1 | 1 | 1 | 1 |
| opan-2-yl)-1,4a-dimethyl-2,3,4,5,6,7,8,8a-octahydro  | 0 | 0 | 0 | 1 |
| Napelline                                            | 0 | 0 | 0 | 0 |
| Norisoboldine                                        | 0 | 0 | 0 | 0 |
| 2'-Deoxyadenosine                                    | 1 | 1 | 0 | 1 |
| Handelin                                             | 0 | 0 | 1 | 0 |
| Ursolic acid                                         | 0 | 0 | 1 | 0 |
| Scutellarin                                          | 1 | 0 | 0 | 0 |
| Erucamide                                            | 1 | 0 | 1 | 1 |
| Phenylethyl primeveroside                            | 1 | 1 | 1 | 1 |
| Valerophenone                                        | 1 | 0 | 0 | 1 |
| Artemetin                                            | 0 | 0 | 0 | 1 |
| Kaempferitrin                                        | 1 | 1 | 0 | 0 |

|                                                                    |   |   |   |   |
|--------------------------------------------------------------------|---|---|---|---|
| Ligustilide                                                        | 1 | 0 | 0 | 0 |
| delta-Dodecalactone                                                | 0 | 1 | 1 | 0 |
| Stachydrine                                                        | 1 | 1 | 0 | 1 |
| Huperzine B                                                        | 1 | 1 | 1 | 1 |
| Cantharidin                                                        | 1 | 1 | 1 | 1 |
| Ecgonine                                                           | 0 | 1 | 0 | 1 |
| aucubin                                                            | 0 | 0 | 0 | 0 |
| beta-D-Glucopyranoside, 4-(hydroxymethyl)phenyl                    | 1 | 1 | 0 | 0 |
| Sarsasapogenin                                                     | 1 | 0 | 0 | 1 |
| 2-hexyl-5-propyl-resorcinol                                        | 0 | 1 | 1 | 1 |
| -8-methylene-2,3,6,7,7a,8,10a,10b-octahydrooxireno                 | 1 | 0 | 0 | 0 |
| Morusin                                                            | 1 | 0 | 0 | 0 |
| 5-O-Demethylnobiletin                                              | 0 | 0 | 0 | 0 |
| N-(1-hydroxy-3-phenylpropan-2-yl)benzamide                         | 1 | 0 | 0 | 1 |
| Curcumol                                                           | 1 | 0 | 0 | 0 |
| Atractylenolide I                                                  | 0 | 0 | 0 | 1 |
| (+)-Pinoresinol                                                    | 0 | 0 | 0 | 0 |
| -6,14-dioxo-7,13-dioxatricyclo[10.2.1.0 <sup>4,8</sup> ]pentadeca- | 1 | 0 | 0 | 1 |
| Alisol B 23-acetate                                                | 0 | 0 | 1 | 0 |
| Anthranilic acid                                                   | 0 | 0 | 0 | 0 |
| -furan]-2,5'(3H)-dione, octahydro-8-hydroxy-6,8-dir                | 0 | 0 | 1 | 0 |
| Dihydro-8-deoxy-lactucin                                           | 0 | 0 | 0 | 1 |
| 1,3,3a,4,6,6a-hexahydrofuro[3,4-c]furan-6-yl]-2-meth               | 0 | 0 | 0 | 0 |
| Pinoresinol 4-O-glucoside                                          | 1 | 0 | 0 | 0 |
| Vasicinone                                                         | 0 | 1 | 0 | 1 |
| Jervine                                                            | 0 | 0 | 0 | 0 |
| Neoruscogenin                                                      | 1 | 0 | 0 | 0 |
| Androstane-3,17-diol                                               | 0 | 0 | 0 | 0 |
| Trigonelline HCl                                                   | 1 | 1 | 0 | 1 |
| Epibrassinolide                                                    | 0 | 1 | 0 | 0 |
| salviaflaside                                                      | 0 | 0 | 0 | 0 |
| Tomatidine                                                         | 1 | 1 | 1 | 1 |
| Bruceine D                                                         | 0 | 0 | 1 | 0 |
| ydroxy-6-(hydroxymethyl)oxan-2-yl]oxy-1,5,6,7a-te                  | 1 | 1 | 1 | 1 |
| 4,5-trimethoxyphenyl)-1,3,3a,4,6,6a-hexahydrofuro[3                | 1 | 1 | 1 | 1 |
| Khellin                                                            | 1 | 0 | 0 | 0 |
| Arginine                                                           | 0 | 0 | 1 | 0 |
| GLUCOSAMINE                                                        | 1 | 1 | 1 | 1 |
| Flavokawain b                                                      | 0 | 0 | 0 | 0 |
| Tetramethylpyrazine                                                | 0 | 1 | 0 | 0 |
| -4,8-Dihydroxy-3,6,9-tris(methylene)decahydroazule                 | 0 | 0 | 0 | 0 |
| gamma-Linolenic acid                                               | 1 | 0 | 1 | 1 |
| 3,4-dihydroxyphenyl)-3,7-dihydroxy-2,3-dihydrochro                 | 1 | 1 | 1 | 1 |
| Vitexin rhamnoside                                                 | 0 | 1 | 0 | 0 |
| Azelaic acid                                                       | 0 | 0 | 0 | 0 |
| -trihydroxy-6-[[[(2R,3R,4R,5R,6S)-3,4,5-trihydroxy-6               | 1 | 1 | 0 | 1 |
| 16-Oxo-19-beyeranoic acid                                          | 1 | 0 | 1 | 0 |
| Echinenone                                                         | 1 | 1 | 0 | 1 |
| Adenosine                                                          | 1 | 1 | 1 | 1 |
| (+/-)-Jasmonic acid                                                | 0 | 0 | 0 | 0 |
| 3-Hydroxybenzaldehyde                                              | 0 | 0 | 0 | 1 |

|                                                                                 |   |   |   |   |
|---------------------------------------------------------------------------------|---|---|---|---|
| Nardosinone                                                                     | 0 | 0 | 1 | 0 |
| Cearoin                                                                         | 0 | 0 | 0 | 0 |
| D-Pantothenic acid                                                              | 1 | 1 | 1 | 1 |
| Tryptamine                                                                      | 1 | 1 | 0 | 1 |
| P-Anisic acid                                                                   | 0 | 0 | 1 | 0 |
| 25-Tetrahydroxy-9,10,14-trimethyl-4,9-cyclo-9,10-se                             | 0 | 0 | 0 | 1 |
| Wedelolactone                                                                   | 1 | 1 | 0 | 0 |
| Periplogenin                                                                    | 1 | 0 | 1 | 1 |
| Apigenin-7-O-beta-D-glucoside                                                   | 1 | 0 | 1 | 1 |
| Trehalose                                                                       | 0 | 1 | 0 | 0 |
| Zizyberanalic acid                                                              | 0 | 1 | 0 | 0 |
| HUMULENE (alpha)                                                                | 0 | 0 | 0 | 0 |
| Noreugenin                                                                      | 1 | 0 | 1 | 0 |
| (-)-12-hydroxyjasmonic acid                                                     | 1 | 1 | 0 | 1 |
| oxy-5-[(E)-3-(4-hydroxyphenyl)prop-2-enyl]oxycyc                                | 1 | 0 | 0 | 0 |
| Linalool                                                                        | 1 | 0 | 0 | 0 |
| geniposide                                                                      | 0 | 0 | 1 | 0 |
| Methyl 3,4,5-trimethoxycinnamate                                                | 1 | 0 | 1 | 1 |
| Calceolarioside B                                                               | 1 | 0 | 1 | 1 |
| ,8-trimethyl-4a,5,6,7,7a,8,9,9a-octahydroazuleno[6,5-                           | 0 | 0 | 0 | 0 |
| O-(3-Hydroxy-7-drimen-11-yl)umbelliferone                                       | 1 | 0 | 0 | 0 |
| Piperanine                                                                      | 0 | 0 | 0 | 0 |
| Hinokitiol                                                                      | 0 | 0 | 1 | 0 |
| Isovitexin 2''-O-arabinoside                                                    | 1 | 1 | 0 | 1 |
| Ginkgolide B                                                                    | 1 | 0 | 0 | 1 |
| 3,4-Dihydroxy-L-phenylalanine                                                   | 1 | 1 | 0 | 1 |
| Domoic acid                                                                     | 0 | 0 | 0 | 0 |
| Ginkgolic acid (C13:0)                                                          | 0 | 0 | 0 | 0 |
| l,5-trihydroxy-6-(hydroxymethyl)oxan-2-yl]oxy-2,5a,                             | 0 | 0 | 0 | 0 |
| Dihydrokaempferol                                                               | 0 | 0 | 1 | 1 |
| Bassanolide                                                                     | 1 | 0 | 0 | 1 |
| xy-2-(4-hydroxyphenyl)-8-(3-methylbut-2-enyl)-2,3- $\alpha$                     | 1 | 0 | 0 | 0 |
| methyl)-5,9-dimethyltetracyclo[11.2.1.0 <sup>1,10</sup> .0 <sup>4,9</sup> ]hexa | 1 | 0 | 0 | 0 |
| Toddalolactone                                                                  | 0 | 0 | 0 | 0 |
| 3-methoxyphenyl)-4-(hydroxymethyl)oxolan-3-yl]me                                | 1 | 0 | 1 | 1 |
| Oxypeucedanin hydrate                                                           | 0 | 0 | 0 | 0 |
| Oleamide                                                                        | 1 | 0 | 1 | 1 |
| Betulinic Acid                                                                  | 1 | 0 | 1 | 0 |
| oxyphenyl)-3,5-dihydroxy-3,4-dihydro-2H-chromen-                                | 0 | 0 | 1 | 0 |
| Ursodeoxycholic acid                                                            | 0 | 0 | 0 | 0 |
| linderalactone                                                                  | 0 | 1 | 0 | 0 |
| LOVASTATIN                                                                      | 0 | 0 | 1 | 1 |
| Ethyl ferulate                                                                  | 0 | 0 | 0 | 0 |
| 15-trihydroxy-10,14,17,17-tetramethyl-11-oxo-6-oxa                              | 1 | 0 | 0 | 1 |
| Alisol C 23-acetate                                                             | 0 | 1 | 0 | 0 |
| r-29-methoxy-29-oxo-3-(pentopyranosyloxy)olean-12                               | 0 | 1 | 0 | 0 |
| oxan-2-yl]oxy-14-hydroxy-10,13-dimethyl-1,2,3,4,5,6                             | 0 | 0 | 0 | 0 |
| 4-[[[(2E)-3-(4-hydroxy-3-methoxyphenyl)-1-oxo-2-pr                              | 0 | 0 | 0 | 0 |
| (-)-Sinoacutine                                                                 | 0 | 0 | 1 | 0 |
| Kanzonol C                                                                      | 0 | 0 | 0 | 0 |
| thyl)-6-[4-(4-hydroxy-2,6,6-trimethylcyclohexen-1-y                             | 0 | 0 | 1 | 0 |



|                                                       |   |   |   |   |
|-------------------------------------------------------|---|---|---|---|
| gamma-Decalactone                                     | 0 | 0 | 0 | 0 |
| SECOISOLARICIRE SINOL                                 | 1 | 0 | 1 | 0 |
| 1-Caffeoylquinic acid                                 | 1 | 0 | 1 | 0 |
| Sinapoylcholine                                       | 0 | 0 | 0 | 1 |
| Isoferulic acid                                       | 0 | 0 | 0 | 1 |
| 1-Methoxy-3-carbaldehyde                              | 0 | 0 | 0 | 1 |
| Steviol-19-O-glucoside                                | 0 | 0 | 0 | 0 |
| Sinapoylhexoside                                      | 1 | 1 | 0 | 0 |
| Epmedin C                                             | 1 | 0 | 0 | 0 |
| Allethrin                                             | 1 | 0 | 0 | 0 |
| Inosine                                               | 0 | 0 | 0 | 0 |
| ESTRIOL                                               | 1 | 0 | 1 | 1 |
| Androsta-1,4-Dien-3,17-Dione                          | 0 | 1 | 0 | 1 |
| Sarracenin                                            | 0 | 0 | 1 | 0 |
| Pyrocatechol                                          | 0 | 0 | 0 | 0 |
| uercetin-3-O-beta-D-glucose-7-O-beta-D-gentiobiosid   | 0 | 0 | 0 | 1 |
| sclareol                                              | 0 | 0 | 0 | 0 |
| bilobol                                               | 0 | 0 | 0 | 0 |
| 7-methoxy-9,10-dihydrophenanthrene-2,5-diol           | 0 | 0 | 0 | 0 |
| delta-Decalactone                                     | 1 | 0 | 1 | 0 |
| -Furyl)-3a,7-dimethyl-3a,4,5,6-tetrahydro-2-benzofu   | 0 | 0 | 0 | 0 |
| Ingenol-5,20-acetonide-3-O-angelate                   | 0 | 0 | 0 | 1 |
| POTASSIUM SORBATE                                     | 1 | 0 | 0 | 0 |
| Acetylvanillin                                        | 0 | 0 | 0 | 0 |
| )-5,8a-dimethyl-2-methylidene-3,4,4a,6,7,8-hexahydr   | 0 | 0 | 1 | 0 |
| 14-Deoxyandrographolide                               | 0 | 0 | 0 | 0 |
| Dictamnine                                            | 0 | 0 | 1 | 1 |
| droxy-4-(hydroxymethyl)oxolan-2-yl]oxy-2-(hydroxy     | 1 | 0 | 1 | 0 |
| Rutaevin                                              | 1 | 0 | 0 | 0 |
| Eurycomalactone                                       | 1 | 0 | 0 | 1 |
| Icariin                                               | 1 | 0 | 0 | 0 |
| Syringic acid                                         | 1 | 0 | 1 | 0 |
| !S,3R,4S,5S,6R)-3,4,5-trihydroxy-6-(hydroxymethyl)    | 0 | 0 | 1 | 0 |
| Indigo                                                | 0 | 0 | 0 | 0 |
| Cytisine                                              | 0 | 0 | 0 | 0 |
| hydroxy-6-(hydroxymethyl)oxan-2-yl]oxy-1,5,6,7a-te    | 0 | 0 | 0 | 0 |
| Neoline/Bullatine B                                   | 0 | 0 | 0 | 1 |
| Flavokawain C                                         | 0 | 0 | 1 | 0 |
| Myricetin-3-Galactoside                               | 1 | 0 | 0 | 0 |
| oy-6-[5-hydroxy-3-(4-hydroxyphenyl)-4-oxochromen-     | 1 | 0 | 0 | 1 |
| beta-D-Glucopyranoside, (3Z)-3-hexen-1-yl             | 0 | 0 | 0 | 0 |
| 5-(hydroxymethyl)-5,8a-dimethyl-2-methylenedecahy     | 0 | 0 | 1 | 0 |
| l)-3,4,5-trihydroxy-6-(hydroxymethyl)oxan-2-yl]oxy    | 1 | 1 | 0 | 1 |
| Perillartine                                          | 0 | 0 | 0 | 0 |
| Apigenin-6-C-glucoside-7-O-glucoside                  | 0 | 0 | 0 | 1 |
| Eugenol                                               | 1 | 1 | 0 | 1 |
| l)-2-one, 3,3a,4,7,8,8a-hexahydro-6-(3-hydroxybutyl)- | 0 | 0 | 1 | 0 |
| Histamine                                             | 0 | 0 | 1 | 1 |
| ropan-2-yl)-8a-methyl-4-methylidene-1,2,3,4a,5,6,7,8  | 0 | 0 | 0 | 1 |
| Atenolol                                              | 0 | 0 | 0 | 0 |
| retronecine                                           | 0 | 0 | 0 | 0 |

|                                                                                                          |   |   |   |   |
|----------------------------------------------------------------------------------------------------------|---|---|---|---|
| Fusaproliferin_130137                                                                                    | 1 | 1 | 1 | 0 |
| Penicillic Acid                                                                                          | 1 | 1 | 0 | 1 |
| -Dihydroxyphenyl)-2-propenoyl]oxy}-1,3,5-trihydroxy                                                      | 0 | 0 | 1 | 0 |
| Gardenin B                                                                                               | 1 | 0 | 0 | 1 |
| Daurisoline                                                                                              | 1 | 0 | 0 | 1 |
| 3-Hydroxyflavone                                                                                         | 0 | 0 | 0 | 0 |
| alpha-Santonin                                                                                           | 1 | 1 | 1 | 1 |
| Scopolamine butylbromide                                                                                 | 1 | 0 | 0 | 1 |
| Capsaicin                                                                                                | 0 | 1 | 0 | 0 |
| exo-9,10-dihydropyrano[2,3-h]chromen-9-yl) (Z)-2-methoxy                                                 | 1 | 0 | 0 | 0 |
| Isolicoflavonol                                                                                          | 1 | 1 | 0 | 0 |
| Totarol                                                                                                  | 0 | 1 | 0 | 1 |
| monolinolein                                                                                             | 1 | 1 | 0 | 1 |
| 5-deoxy- $\alpha$ -L-mannopyranosyl-(1 $\rightarrow$ 4)-[ $\beta$ -D-glucopyranosyl-(1 $\rightarrow$ 3)] | 1 | 0 | 0 | 1 |
| Salicylic acid                                                                                           | 1 | 1 | 1 | 1 |
| Quercetin-3-(6"-malonyl)-Glucoside                                                                       | 1 | 1 | 1 | 1 |
| Cephalotaxine                                                                                            | 1 | 0 | 0 | 0 |
| Complanatuside                                                                                           | 1 | 0 | 0 | 1 |
| jaeschkeanadiol                                                                                          | 1 | 0 | 1 | 1 |
| CHOLESTEROL                                                                                              | 1 | 0 | 1 | 0 |
| 3R,4S,5S,6R)-3,4,5-trihydroxy-6-(hydroxymethyl)oxan-2-yl]oxy                                             | 0 | 0 | 0 | 0 |
| (1,2,4-Trihydroxy-2,6,6-trimethylcyclohexyl)-3-butenoic acid                                             | 0 | 0 | 0 | 0 |
| -6-oxo-2,3-dihydropyran-3-yl] (2E,4E,6S)-8-hydroxy-2,3,4-trimethyl-                                      | 1 | 0 | 0 | 0 |
| -Trimethyl-11-oxabicyclo[8.2.1]trideca-1(13),4,7-trimethyl-                                              | 1 | 1 | 0 | 0 |
| -,5,8-trimethyl-11-oxatetracyclo[7.3.1.0~1,9~.0~3,7~.0]octane                                            | 0 | 1 | 0 | 0 |
| Oleanane -4H, + 2O                                                                                       | 0 | 0 | 0 | 0 |
| methoxyphenyl)prop-2-enoyl]oxy-2,5-bis(hydroxymethyl)oxan-2-yl]oxy                                       | 0 | 0 | 0 | 1 |
| Limonin                                                                                                  | 1 | 0 | 0 | 0 |
| Puerarin                                                                                                 | 1 | 0 | 0 | 1 |
| l)oxolan-2-yl]oxy-4,5-dihydroxy-6-(hydroxymethyl)cyclohexyl)-3-butenoic acid                             | 0 | 0 | 0 | 0 |
| Jatrorrhizine                                                                                            | 0 | 0 | 0 | 0 |
| Casticin                                                                                                 | 0 | 0 | 0 | 0 |
| 2',4'-Dihydroxychalcone                                                                                  | 1 | 0 | 0 | 0 |
| Arteannuin                                                                                               | 1 | 0 | 0 | 1 |
| Spermidine                                                                                               | 0 | 0 | 0 | 0 |
| thyl)-5,8a-dimethyl-2-methylidene-3,4,4a,6,7,8-hexalene-1,2-diol                                         | 0 | 0 | 0 | 0 |
| Laetanine                                                                                                | 1 | 0 | 1 | 1 |
| Periplocymarin                                                                                           | 1 | 1 | 1 | 1 |
| Heptadecanoic acid                                                                                       | 1 | 0 | 0 | 0 |
| $\beta$ -Gentiobiose                                                                                     | 1 | 1 | 1 | 1 |
| Homoorientin                                                                                             | 1 | 1 | 1 | 1 |
| catalposide                                                                                              | 0 | 0 | 0 | 0 |
| rooxymethyl)oxolan-2-yl]oxy-3,4,5-trihydroxyoxan-2-yl]oxy                                                | 1 | 0 | 0 | 1 |
| Desoxyrhaponticin                                                                                        | 1 | 0 | 1 | 0 |
| SINAPIC ACID                                                                                             | 0 | 1 | 0 | 0 |
| Sudan III                                                                                                | 1 | 0 | 0 | 1 |
| matairesinol                                                                                             | 1 | 0 | 0 | 0 |
| Aleuretic Acid                                                                                           | 0 | 1 | 0 | 0 |
| Glabrone                                                                                                 | 1 | 0 | 0 | 0 |
| Ethyl gallate                                                                                            | 0 | 0 | 1 | 0 |
| R)-3,4,5-trihydroxy-6-(hydroxymethyl)oxan-2-yl]oxy                                                       | 1 | 0 | 0 | 0 |

|                                                            |   |   |   |   |
|------------------------------------------------------------|---|---|---|---|
| HYDROCORTISONE                                             | 1 | 1 | 0 | 1 |
| 3,19-Dihydroxyurs-12-ene-23,28-dioic acid                  | 0 | 0 | 1 | 0 |
| plumieride                                                 | 0 | 0 | 0 | 1 |
| Laudanoside                                                | 1 | 0 | 0 | 0 |
| Sparteine                                                  | 0 | 1 | 0 | 0 |
| Rubiadin                                                   | 1 | 0 | 0 | 0 |
| 3-Hydroxyurs-12-en-23-oic acid                             | 0 | 1 | 1 | 0 |
| Iranone, 5,6,7,7a-tetrahydro-6-hydroxy-4,4,7a-trimethyl    | 0 | 1 | 0 | 0 |
| Dopamine                                                   | 1 | 0 | 0 | 1 |
| ADENOSINE 3',5'-CYCLIC MONOPHOSPHATE                       | 1 | 1 | 0 | 1 |
| Glutamyltyrosine                                           | 1 | 1 | 1 | 1 |
| Anisic aldehyde                                            | 0 | 1 | 1 | 0 |
| Methyl pyrazine 2-carboxylate                              | 0 | 1 | 0 | 1 |
| 4-hydroxy-3,7-dimethylocta-2,6-dienoxy]-6-(hydroxy         | 1 | 0 | 1 | 0 |
| Homoserine                                                 | 1 | 1 | 0 | 1 |
| hydroxy-6-(5-hydroxy-4-oxo-2-phenylchromen-7-yl)chromen-   | 0 | 0 | 0 | 0 |
| hydroxy-5-methylphenyl)methyl]-3,5-dihydroxy-4,4-dimethyl- | 0 | 1 | 0 | 0 |
| 4-(3-hydroxybutyl)-3,5,5-trimethylcyclohex-3-en-1-ol       | 0 | 0 | 1 | 0 |
| L-Anserine nitrate salt                                    | 1 | 1 | 1 | 0 |
| Flavone base + 3O, C-Hex, C-Pen                            | 1 | 0 | 0 | 1 |
| Rhodinyl Acetate                                           | 1 | 1 | 0 | 0 |
| Columbin                                                   | 1 | 0 | 1 | 1 |
| gamma-Dodecalactone                                        | 0 | 1 | 0 | 0 |
| Corylin                                                    | 0 | 0 | 0 | 1 |
| Goniothalenol                                              | 0 | 0 | 1 | 0 |
| Sophocarpine                                               | 0 | 1 | 0 | 0 |
| (-)-Epicatechin gallate                                    | 1 | 0 | 0 | 0 |
| oxy-6-[[[(2S,3R,4S,5R)-3,4,5-trihydroxyoxan-2-yl]oxy       | 1 | 0 | 0 | 0 |
| Harmaline                                                  | 0 | 1 | 0 | 0 |
| oxy-5-(hydroxymethyl)oxolan-2-yl]oxymethyl]-6-[(2E)-       | 1 | 0 | 0 | 0 |
| 3,3',4,4'-tetrahydroxylignan                               | 1 | 0 | 0 | 0 |
| 3R,4R,5R,6S)-3,4,5-trihydroxy-6-methyloxan-2-yl]oxy        | 0 | 0 | 0 | 1 |
| Epigallocatechin                                           | 1 | 0 | 0 | 0 |
| 1 (2R,3S)-3-(benzoylamino)-2-hydroxy-3-phenylpropyl        | 1 | 0 | 0 | 0 |
| Glutamylphenylalanine                                      | 1 | 1 | 0 | 1 |
| Hydroquinone                                               | 1 | 0 | 0 | 0 |
| Tangeritin                                                 | 1 | 0 | 0 | 0 |
| Lobeline A                                                 | 0 | 0 | 0 | 1 |
| Curcubitacin IIa                                           | 0 | 0 | 1 | 0 |
| hydroxy-3-(4-hydroxyphenyl)-3,4-dihydroisochromen-7-yl     | 0 | 0 | 0 | 0 |
| -(4-hydroxyphenyl)-6,8-bis(3,4,5-trihydroxyoxan-2-yl)oxy   | 1 | 0 | 0 | 1 |
| 1-5-yl)propan-2-yl]-4,5-dimethoxy-2-prop-2-enylcyclohex-   | 0 | 0 | 0 | 0 |
| Alisol B                                                   | 0 | 0 | 0 | 0 |
| trifolirhizin                                              | 0 | 0 | 0 | 0 |
| Lobaric Acid                                               | 1 | 0 | 0 | 1 |
| Retrorsine                                                 | 1 | 0 | 0 | 0 |
| pyranosyl-(1->2)-[beta-D-xylopyranosyl-(1->6)]-beta-D-     | 1 | 0 | 1 | 0 |
| 5S,6R)-3,4,5-trihydroxy-6-methyloxan-2-yl]oxy-2,3,4-tri-   | 0 | 0 | 1 | 0 |
| 3,9-Dimethoxypterocarpan                                   | 1 | 0 | 1 | 1 |
| Neosperidin dihydrochalcone                                | 1 | 0 | 0 | 0 |
| Caudatin                                                   | 0 | 1 | 0 | 0 |

|                                                      |   |   |   |   |
|------------------------------------------------------|---|---|---|---|
| Aconine                                              | 0 | 1 | 0 | 1 |
| 7-Methoxy-4-methylcoumarin                           | 0 | 0 | 0 | 0 |
| ,3-Dihydroxy-3-methylbutoxy)furo(3,2-g)chromen-7-    | 0 | 0 | 0 | 0 |
| 3-(3,4-dihydroxyphenyl)-8-hydroxyisochromen-1-one    | 1 | 0 | 0 | 0 |
| Jasminoside B                                        | 1 | 0 | 1 | 0 |
| (-)-Syringaresinol di-O-glucoside                    | 0 | 0 | 1 | 1 |
| Methylparaben                                        | 0 | 0 | 1 | 0 |
| cyphenyl)-6-[3,4,5-trihydroxy-6-(hydroxymethyl)oxan- | 1 | 1 | 1 | 1 |
| 4-O-Methylphloracetophenone                          | 0 | 0 | 1 | 1 |
| -tetramethyl-13-[(2-methylbutanoyl)oxy]-5-oxotetrac  | 1 | 0 | 0 | 0 |
| Senkyunolide A                                       | 0 | 1 | 0 | 0 |
| Neoandrographolide                                   | 0 | 1 | 0 | 0 |
| hydroxyphenyl)-3,5,7-trihydroxy-6-methyl-2,3-dihyd   | 1 | 1 | 0 | 0 |
| Pesticide3_Propoxur_C11H15NO3_Baygon                 | 1 | 1 | 0 | 1 |
| ydroxy-6-(hydroxymethyl)oxan-2-yl] 3,4,5-trimethox   | 1 | 0 | 1 | 1 |
| 5-O-Methylvisammioside                               | 0 | 0 | 0 | 0 |
| Levistilide A                                        | 0 | 1 | 1 | 1 |
| Neriifolin                                           | 0 | 1 | 0 | 0 |
| 2,6-dihydroxy-4-methoxyphenyl)-3-phenylpropan-1-ol   | 0 | 0 | 0 | 0 |
| zucapsaicin                                          | 0 | 0 | 1 | 0 |
| Bruceine A                                           | 1 | 0 | 0 | 0 |
| 7,8-dihydromethysticin                               | 0 | 0 | 1 | 0 |
| 3-deoxysappanchalcone                                | 1 | 0 | 0 | 0 |
| EPINEPHRINE                                          | 1 | 0 | 0 | 1 |
| Kaempferol-7-O-rhamnoside                            | 0 | 0 | 0 | 0 |
| ydroxy-2-(2-hydroxy-4-methylphenyl)-6-methylhept-    | 0 | 1 | 0 | 0 |
| 3-Acetylaconitine                                    | 0 | 0 | 0 | 0 |
| Procyanidin A2                                       | 0 | 0 | 1 | 0 |
| Kainic Acid                                          | 0 | 0 | 0 | 0 |
| Peimine                                              | 0 | 0 | 0 | 0 |
| ,6S)-6-(4-ethenylphenoxy)-3,4,5-trihydroxyoxan-2-yl  | 1 | 1 | 1 | 1 |
| neoeriocitrin                                        | 0 | 0 | 0 | 0 |
| 4-Aminophenol                                        | 0 | 1 | 1 | 0 |
| Tsugaric acid A                                      | 0 | 0 | 0 | 0 |
| Rotenone                                             | 1 | 0 | 0 | 0 |
| hoxycarbonyl-2-[(2S,3R,4S,5S,6R)-3,4,5-trihydroxy-   | 1 | 1 | 0 | 0 |
| Nobiletin                                            | 1 | 1 | 1 | 1 |
| Linderane                                            | 1 | 1 | 1 | 1 |
| ostruthin                                            | 0 | 0 | 1 | 0 |
| Berberine                                            | 1 | 0 | 0 | 1 |
| Hydroxygenkwanin                                     | 1 | 0 | 0 | 1 |
| Orcinol glucoside                                    | 0 | 0 | 0 | 0 |
| 2,6-di-tert-Butylphenol                              | 0 | 1 | 0 | 0 |
| Semilicoisoflavone B                                 | 1 | 0 | 0 | 0 |
| Pseudoprotodioscin                                   | 1 | 0 | 0 | 0 |
| oxy-3-methoxyphenyl)-3,4-dimethyloxolan-2-yl]-2-m    | 0 | 0 | 1 | 0 |
| Diosmetin-7-O-neohesperidoside                       | 0 | 1 | 0 | 0 |
| Bilobalide                                           | 0 | 0 | 0 | 0 |
| aschantin                                            | 0 | 0 | 0 | 1 |
| Kahweol                                              | 0 | 0 | 0 | 0 |
| Tazettine                                            | 0 | 1 | 0 | 1 |



|                                                            |   |   |   |   |
|------------------------------------------------------------|---|---|---|---|
| $\gamma$ -6-(hydroxymethyl)oxan-2-yl]oxyphenyl]-1,3,3a,4,6 | 1 | 0 | 1 | 0 |
| izyl 6-O-beta-D-glucopyranosyl-beta-D-glucopyranos         | 0 | 0 | 1 | 0 |
| Gallic acid                                                | 1 | 0 | 0 | 0 |
| Piperine                                                   | 1 | 0 | 0 | 0 |
| Indole-3-acetic acid                                       | 1 | 1 | 0 | 0 |
| Tamoxifen citrate54965-24-1                                | 0 | 0 | 0 | 0 |
| Androsterone                                               | 1 | 1 | 1 | 1 |
| Ginkgolide K                                               | 1 | 1 | 1 | 1 |
| tetramethyl-1,4,4a,6,7,8-hexahydronaphthalen-1-yl)n        | 1 | 0 | 0 | 0 |
| 3,4,5-trimethoxycinnamic aldehyde                          | 0 | 0 | 0 | 0 |
| (+)-beta-Hydrastine                                        | 0 | 0 | 0 | 1 |
| Methyl gallate                                             | 1 | 0 | 0 | 0 |
| Sulfanilic acid                                            | 0 | 1 | 0 | 1 |
| Biotin                                                     | 0 | 1 | 0 | 0 |
| maltotriose                                                | 0 | 0 | 1 | 0 |
| CREATINE                                                   | 1 | 0 | 0 | 1 |
| Bicuculline                                                | 1 | 0 | 1 | 0 |
| Coniine                                                    | 1 | 1 | 1 | 0 |
| 3-Furfuryl 2-pyrrolicarboxylate                            | 1 | 1 | 1 | 1 |
| Dimethylcurcumin                                           | 1 | 0 | 1 | 1 |
| Ethinylestradiol                                           | 1 | 0 | 1 | 0 |
| 4-Hydroxybenzoylcholine                                    | 1 | 0 | 0 | 1 |
| Echimidine N-oxide                                         | 0 | 0 | 0 | 1 |
| Methylxanthoxylin                                          | 1 | 0 | 0 | 0 |
| abscisic acid                                              | 0 | 1 | 0 | 1 |
| Epmedin B                                                  | 1 | 0 | 0 | 1 |
| genipin 1-gentiobioside                                    | 0 | 0 | 0 | 0 |
| Methylnissolin-3-O-glucoside                               | 0 | 0 | 1 | 0 |
| 3R,4S,5S,6R)-3,4,5-trihydroxy-6-(hydroxymethyl)ox          | 1 | 1 | 0 | 1 |
| 6,7,8-trimethoxychromen-2-one                              | 0 | 0 | 0 | 0 |
| Isosafrole                                                 | 1 | 1 | 1 | 1 |
| 2,17-tetrahydroxy-16-methyl-2,4,14,19-tetraoxahexa         | 1 | 0 | 1 | 1 |
| Isobavachin                                                | 1 | 0 | 1 | 0 |
| Serine                                                     | 0 | 1 | 0 | 1 |
| 3',4',7-Trihydroxyflavanone                                | 1 | 1 | 1 | 1 |
| $\gamma$ -3-methoxyphenyl)methyl]-3-(hydroxymethyl)oxola   | 1 | 0 | 1 | 1 |
| Isopropyl 4-Hydroxybenzoate                                | 1 | 1 | 0 | 1 |
| icyclo[2.2.1]heptanyl) (E)-3-(4-hydroxy-3-methoxyp         | 0 | 0 | 0 | 0 |
| Andrographolide                                            | 0 | 0 | 0 | 0 |
| 2,5-dihydroxy benzoic acid                                 | 0 | 0 | 0 | 1 |
| 5-en-2-yl)-4,4,8,10,14-pentamethyl-2,3,5,6,7,9,11,12,      | 0 | 0 | 0 | 1 |
| 5-Hydroxy-1-tetralone                                      | 0 | 1 | 0 | 0 |
| Vinpocetine                                                | 0 | 0 | 1 | 0 |
| xymethyl)oxan-2-yl]oxy-2,5a,6,6a-tetrahydro-1bH-ox         | 1 | 0 | 0 | 0 |
| Xanyhyletin                                                | 0 | 0 | 1 | 0 |
| .5-dimethoxyphenyl)-1,3,3a,4,6,6a-hexahydrofuro[3,4        | 0 | 0 | 1 | 0 |
| acanthoside B                                              | 1 | 1 | 1 | 1 |
| Cortodoxone                                                | 1 | 0 | 0 | 1 |
| Lup-20(29)-en-3-ol, (3alpha)-                              | 1 | 1 | 1 | 1 |
| Celastrol                                                  | 0 | 1 | 0 | 0 |
| Delsoline509-18-2                                          | 0 | 1 | 1 | 0 |

|                                                                                                        |   |   |   |   |
|--------------------------------------------------------------------------------------------------------|---|---|---|---|
| Ranaconitine                                                                                           | 0 | 0 | 0 | 0 |
| DEOXYCARNITINE                                                                                         | 0 | 1 | 0 | 1 |
| Aurantio-obtusin                                                                                       | 0 | 0 | 0 | 0 |
| 3,4,5-trimethyl-10-(2-methylbut-3-en-2-yl)pyrano[3,2-g]c                                               | 0 | 0 | 0 | 1 |
| Diethyl phthalate                                                                                      | 0 | 0 | 1 | 0 |
| Pilosanone B                                                                                           | 0 | 0 | 0 | 0 |
| Carnitine (DL)                                                                                         | 1 | 0 | 1 | 1 |
| Papaverine HCl                                                                                         | 1 | 1 | 0 | 0 |
| Fluoromoclofenololomatin                                                                               | 0 | 0 | 0 | 0 |
| (+/-)-Synephrine                                                                                       | 1 | 1 | 0 | 1 |
| Euphorbia factor L1                                                                                    | 0 | 1 | 0 | 1 |
| Chrysin Dimethyl Ether                                                                                 | 0 | 1 | 0 | 1 |
| Ganoderic acid G                                                                                       | 0 | 0 | 0 | 0 |
| 6-Demethoxytangeretin                                                                                  | 0 | 0 | 0 | 1 |
| Murrayone                                                                                              | 0 | 0 | 1 | 0 |
| Sudan I                                                                                                | 0 | 0 | 0 | 0 |
| Flavanone base + 6O                                                                                    | 1 | 0 | 0 | 0 |
| Cimigenol-3-O-beta-D-xylpyranoside                                                                     | 0 | 1 | 0 | 0 |
| 3,4,5-trimethoxy-2,5-bis(hydroxymethyl)oxolan-2-yl]oxy-3,4,5-t                                         | 0 | 0 | 0 | 0 |
| 3,4,5-trimethoxy-2,5-bis(hydroxymethyl)oxolan-2-yl)-1,4a-dimethyl-2,3,4,9,10,10a-hexahydroph           | 1 | 0 | 0 | 1 |
| 5-Methoxyflavanone                                                                                     | 1 | 1 | 0 | 0 |
| 9-(2-methoxy-2-oxoethyl)-4,8,10,12-tetramethyl-7-oxo                                                   | 0 | 0 | 0 | 1 |
| 4-Nitrophenol                                                                                          | 1 | 1 | 0 | 1 |
| Nerylacetate                                                                                           | 1 | 0 | 0 | 0 |
| 6-Hydroxy-3,4,5-trimethoxy-2,5-bis(hydroxymethyl)oxolan-2-yl)-1,4a-dimethyl-2,3,4,9,10,10a-hexahydroph | 1 | 0 | 0 | 0 |
| Isosakuranin                                                                                           | 0 | 0 | 0 | 0 |
| 6-Shogaol                                                                                              | 0 | 0 | 0 | 0 |
| Prim-O-glucosylcimifugin                                                                               | 0 | 0 | 1 | 0 |
| Heliotrine                                                                                             | 0 | 1 | 0 | 1 |
| Quebrachitol                                                                                           | 0 | 0 | 1 | 0 |
| Pantothenic acid (not validated)                                                                       | 1 | 0 | 1 | 1 |
| 2,6-Dimethoxyquinone                                                                                   | 0 | 0 | 0 | 0 |
| beta-Asarone                                                                                           | 1 | 0 | 0 | 0 |
| bakuchiol                                                                                              | 0 | 0 | 0 | 1 |
| Coniferaldehyde                                                                                        | 1 | 0 | 1 | 1 |
| Gallic acid trimethyl ether                                                                            | 1 | 1 | 1 | 1 |
| Pramoxine                                                                                              | 0 | 1 | 0 | 1 |
| Grandisin                                                                                              | 1 | 0 | 0 | 1 |
| 3,4,5-trimethoxy-2,5-bis(hydroxymethyl)oxolan-2-yl)-1,4a-dimethyl-2,3,4,9,10,10a-hexahydroph           | 1 | 1 | 1 | 1 |
| Aloin                                                                                                  | 0 | 0 | 1 | 0 |
| L-2,3-DIAMINOPROPIONIC ACID                                                                            | 1 | 1 | 1 | 1 |
| syringin                                                                                               | 1 | 0 | 1 | 1 |
| Vanillic acid                                                                                          | 0 | 0 | 1 | 0 |
| Agarotetrol                                                                                            | 1 | 0 | 1 | 1 |
| Euphorbiasteroid                                                                                       | 0 | 0 | 0 | 1 |
| Epimedin A1                                                                                            | 0 | 0 | 0 | 0 |
| 3,4,5-trimethoxy-2,5-bis(hydroxymethyl)oxolan-2-yl)-1,4a-dimethyl-2,3,4,9,10,10a-hexahydroph           | 1 | 0 | 0 | 0 |
| 3-O-Acetyldiosgenin                                                                                    | 0 | 1 | 1 | 1 |
| 3,4,5-trimethoxy-2,5-bis(hydroxymethyl)oxolan-2-yl)-1,4a-dimethyl-2,3,4,9,10,10a-hexahydroph           | 0 | 0 | 0 | 0 |
| Aleuritic acid                                                                                         | 0 | 0 | 0 | 0 |
| Licoflavone A                                                                                          | 0 | 1 | 1 | 1 |

|                                                       |   |   |   |   |
|-------------------------------------------------------|---|---|---|---|
| Tulipinolide                                          | 1 | 1 | 1 | 1 |
| Sabinene                                              | 1 | 1 | 1 | 1 |
| oxyphenyl)-1,3,3a,4,6,6a-hexahydrofuro[3,4-c]furan-   | 1 | 0 | 0 | 1 |
| (2S,3R,4S,5S,6R)-3,4,5-trihydroxy-6-(hydroxymethy     | 0 | 0 | 1 | 0 |
| Papaverine                                            | 1 | 0 | 0 | 0 |
| Bavachin                                              | 0 | 0 | 0 | 1 |
| hydroxymethyl)-6-[(E)-3-(4-hydroxyphenyl)prop-2-en    | 1 | 0 | 0 | 0 |
| 9-Aminocamptothecin                                   | 0 | 0 | 0 | 0 |
| yl-2-[(3E,7E)-4,8,12-trimethyl-3,7,11-tridecatrien-1- | 0 | 1 | 0 | 0 |
| Epimedin A                                            | 1 | 0 | 0 | 0 |
| xanthohumol                                           | 0 | 0 | 0 | 0 |
| Leucodin                                              | 0 | 0 | 0 | 1 |
| AMINOADIPATE                                          | 0 | 1 | 0 | 0 |
| Fexofenadine hydrochloride                            | 0 | 1 | 0 | 1 |
| ethyl-3-methylene-2-oxododecahydronaphtho[1,2-b]f     | 0 | 0 | 0 | 0 |
| d, 5-[2-(2,5-dihydro-2-oxo-3-furanyl)ethyl]decahydc   | 0 | 0 | 0 | 0 |
| Hexylamine                                            | 1 | 1 | 1 | 1 |
| HYDROXY-1-METHYLETHYL)-2,3-DIHYDRO-7H                 | 0 | 0 | 0 | 0 |
| Araloside A                                           | 0 | 0 | 1 | 0 |
| ethyl)-6-[4-(hydroxymethyl)-1-propan-2-ylcyclohex     | 0 | 0 | 0 | 0 |
| 4-Hydroxycoumarin                                     | 1 | 0 | 1 | 0 |
| Cyclo-Ile-Pro-diketopiperazine                        | 0 | 1 | 0 | 1 |
| Urocortisone                                          | 0 | 0 | 1 | 0 |
| (-)-Cotinine                                          | 1 | 0 | 0 | 1 |
| Dehydroandrographolide                                | 0 | 0 | 0 | 0 |
| decahydro-5-[(3Z)-5-hydroxy-3-methyl-3-penten-1-yl    | 1 | 0 | 0 | 0 |
| Vindoline                                             | 0 | 1 | 1 | 1 |
| Carnosol                                              | 0 | 0 | 0 | 0 |
| 3-Deoxycaryoptinol                                    | 0 | 1 | 0 | 0 |
| KOBUSONE                                              | 1 | 0 | 0 | 1 |
| 1-2-oxo-9,10-dihydropyrano[2,3-f]chromen-10-yl) (Z    | 1 | 0 | 0 | 0 |
| S-(-)-Carbidopa                                       | 1 | 0 | 1 | 0 |
| Phloridzin                                            | 1 | 0 | 0 | 1 |
| Lamiide                                               | 0 | 0 | 0 | 0 |
| 20-Hydroxyecdysone 20,22-acetonide                    | 0 | 1 | 1 | 0 |
| O-(6-deoxy-alpha-L-mannopyranosyl)-beta-D-glucop      | 1 | 0 | 1 | 0 |
| alpinetin                                             | 1 | 0 | 0 | 0 |
| Phenethylamine                                        | 1 | 1 | 1 | 1 |
| isosakuranetin                                        | 0 | 0 | 0 | 0 |
| decanedioic acid                                      | 0 | 1 | 1 | 0 |
| Grayanotoxin I                                        | 1 | 0 | 0 | 0 |
| Rubescensin A                                         | 0 | 0 | 0 | 0 |
| Ginsenoside compound K                                | 0 | 0 | 0 | 0 |
| Poststerone                                           | 1 | 0 | 1 | 1 |
| (-)-Asarinin                                          | 1 | 0 | 0 | 0 |
| Solanidine (not validated)                            | 0 | 0 | 0 | 0 |
| α-o-3-hexen-1-yl]-2-(beta-D-glucopyranosyloxy)-16-h   | 0 | 0 | 1 | 0 |
| oxy-4-[[[(2E)-3-(4-hydroxyphenyl)-2-propenoyl]oxy]    | 0 | 0 | 0 | 0 |
| hydroxy-3-methoxyphenyl)-6-(3-methylbut-2-enyl)-2,3-  | 1 | 0 | 0 | 1 |
| 3-(4-HYDROXYPHENYL)PYRUVATE                           | 0 | 0 | 1 | 0 |
| Pristimerin                                           | 0 | 0 | 0 | 0 |

|                                                                                                                                                                                                                                             |   |   |   |   |
|---------------------------------------------------------------------------------------------------------------------------------------------------------------------------------------------------------------------------------------------|---|---|---|---|
| 17,17-pentamethyl-8-(prop-1-en-2-yl)pentacyclo[11.1.0.0 <sup>2,5</sup> .0 <sup>3,8</sup> .0 <sup>4,7</sup> ]-3,4,5-trihydroxy-6-(hydroxymethyl)oxane                                                                                        | 0 | 0 | 0 | 0 |
| Fraxinol                                                                                                                                                                                                                                    | 1 | 1 | 0 | 1 |
| Carnitine (DL) Hydrochloride                                                                                                                                                                                                                | 1 | 0 | 0 | 0 |
| Ginkgolide A                                                                                                                                                                                                                                | 0 | 0 | 0 | 0 |
| 1-2-[(2S,3R,4S,5S,6R)-3,4,5-trihydroxy-6-(hydroxymethyl)-2,2,6a,6b,9,12a-hexamethyl-1,3,4,5,6,10,10a,10b,10c,10d,10e,10f,10g,10h,10i,10j,10k,10l,10m,10n,10o,10p,10q,10r,10s,10t,10u,10v,10w,10x,10y,10z]-hexahydro-2H-benzo[5,6-b]pyridine | 1 | 0 | 1 | 0 |
| Flavanone base + 4O, 2Prenyl                                                                                                                                                                                                                | 0 | 0 | 1 | 0 |
| echinacoside                                                                                                                                                                                                                                | 1 | 0 | 0 | 0 |
| Ormosanine                                                                                                                                                                                                                                  | 0 | 0 | 0 | 0 |
| Veratric acid                                                                                                                                                                                                                               | 1 | 1 | 1 | 1 |
| Picrotoxinin                                                                                                                                                                                                                                | 0 | 1 | 1 | 0 |
| Viridiflorine                                                                                                                                                                                                                               | 1 | 0 | 0 | 1 |
| 0                                                                                                                                                                                                                                           | 0 | 0 | 0 | 1 |
| 1-[4-hydroxy-3-(3-methylbut-2-enyl)phenyl]ethanone                                                                                                                                                                                          | 1 | 1 | 0 | 1 |
| 2-Chloro-DL-Phenylalanine                                                                                                                                                                                                                   | 0 | 0 | 1 | 0 |

1 means that the ingredient was detected in the corresponding herb, 0 means that the ingredient was not detected in the corresponding herb

Supplement table 2. UHPLC-QE-MS Analysis negative ions

| Compound name                                                             | yin yang huo | pu huang | da xue teng | pai jiang cao |
|---------------------------------------------------------------------------|--------------|----------|-------------|---------------|
| 2-amino-3-prop-2-enylsulfanylpropanoic acid                               | 1            | 1        | 0           | 0             |
| 2,3-Dihydroxybenzoic acid                                                 | 1            | 1        | 1           | 0             |
| 3-[(Carboxycarbonyl)amino]-L-alanine                                      | 0            | 0        | 1           | 0             |
| 3-Hydroxybenzaldehyde                                                     | 0            | 0        | 0           | 0             |
| Adenine                                                                   | 1            | 1        | 0           | 1             |
| Apigenin                                                                  | 0            | 0        | 0           | 0             |
| Benzoic acid                                                              | 1            | 1        | 1           | 1             |
| Chrysin                                                                   | 0            | 0        | 0           | 0             |
| Coniferylaldehyde                                                         | 1            | 0        | 0           | 0             |
| Demethoxycurcumin                                                         | 1            | 0        | 0           | 0             |
| Deoxyadenosine                                                            | 1            | 0        | 0           | 0             |
| Ecgonine                                                                  | 0            | 0        | 0           | 1             |
| Erythritol                                                                | 0            | 1        | 0           | 0             |
| Fumaric acid                                                              | 0            | 0        | 0           | 1             |
| HIPPURATE                                                                 | 0            | 1        | 0           | 0             |
| Hydroxygenkwanin                                                          | 0            | 0        | 0           | 0             |
| Isobutyl 4-hydroxybenzoate                                                | 1            | 1        | 1           | 1             |
| kojic acid                                                                | 1            | 1        | 1           | 1             |
| PHENYLACETIC ACID                                                         | 1            | 1        | 1           | 1             |
| Picoside III                                                              | 0            | 0        | 0           | 0             |
| Proline                                                                   | 1            | 1        | 0           | 1             |
| PYRIDOXINE                                                                | 1            | 1        | 0           | 1             |
| Quassin                                                                   | 1            | 0        | 0           | 0             |
| Spiculisporic acid                                                        | 0            | 0        | 1           | 0             |
| Threonic acid                                                             | 1            | 0        | 0           | 0             |
| Aspartate                                                                 | 0            | 1        | 1           | 1             |
| Tectorigenin                                                              | 1            | 0        | 0           | 1             |
| Thymol                                                                    | 0            | 0        | 0           | 0             |
| Jaceosidin                                                                | 0            | 1        | 0           | 0             |
| Glucose                                                                   | 0            | 0        | 0           | 0             |
| Maleic acid                                                               | 1            | 1        | 1           | 1             |
| Quinic acid                                                               | 1            | 0        | 1           | 1             |
| 1)-5,9-dimethyltetracyclo[11.2.1.0 <sup>1,10</sup> .0 <sup>4,9</sup> ]hex | 0            | 0        | 0           | 0             |
| 5,7-Dihydroxychromone                                                     | 1            | 1        | 1           | 0             |
| Demethylwedelolactone                                                     | 0            | 0        | 0           | 0             |
| Genistin                                                                  | 0            | 0        | 0           | 0             |
| ISOPALMITIC ACID                                                          | 0            | 0        | 1           | 0             |
| arachidic acid                                                            | 1            | 0        | 0           | 1             |
| geniposide                                                                | 0            | 0        | 0           | 1             |
| Tridecanoic acid                                                          | 0            | 0        | 0           | 0             |
| Gentisic acid                                                             | 1            | 1        | 1           | 1             |
| Oleic acid                                                                | 0            | 0        | 0           | 0             |
| Isoleucine                                                                | 0            | 0        | 0           | 0             |
| 4-HYDROXYBENZOATE                                                         | 1            | 1        | 1           | 1             |
| Sumaresinolic acid                                                        | 0            | 0        | 1           | 0             |
| Lauryl sulfate                                                            | 0            | 0        | 0           | 0             |
| Corosolic acid                                                            | 1            | 0        | 1           | 1             |
| Bergaptol                                                                 | 0            | 0        | 0           | 0             |
| (+)-Epicatechin                                                           | 1            | 1        | 1           | 1             |

|                                                |   |   |   |   |
|------------------------------------------------|---|---|---|---|
| Cholic acid                                    | 0 | 0 | 0 | 1 |
| Rosmarinic acid                                | 0 | 1 | 0 | 1 |
| Carpachromene                                  | 1 | 0 | 0 | 0 |
| Kaempferol                                     | 0 | 0 | 0 | 0 |
| Arbutin                                        | 0 | 0 | 0 | 0 |
| 4-Nitrophenol                                  | 1 | 1 | 1 | 1 |
| Palmitic acid                                  | 0 | 1 | 1 | 1 |
| ζ,11R,12aR)-1,10,11-trihydroxy-1,2,6a,6b,9,9   | 0 | 0 | 1 | 0 |
| Lysionotin                                     | 0 | 0 | 0 | 0 |
| aR)-1,10,11-trihydroxy-9-(hydroxymethyl)-2,    | 0 | 0 | 0 | 0 |
| Erythronolactone                               | 0 | 0 | 0 | 0 |
| Chlorogenic acid                               | 1 | 1 | 1 | 1 |
| Lithocholic acid                               | 0 | 0 | 0 | 0 |
| Isorhamnetin                                   | 1 | 1 | 0 | 1 |
| Galactose                                      | 1 | 0 | 1 | 0 |
| Dihydromyricetin                               | 1 | 0 | 0 | 0 |
| syringaresinol                                 | 1 | 0 | 1 | 0 |
| D-GLYCERIC ACID                                | 1 | 1 | 1 | 1 |
| Asiatic acid                                   | 0 | 0 | 1 | 0 |
| p-Hydroxybenzaldehyde                          | 0 | 0 | 0 | 0 |
| Citric acid                                    | 1 | 1 | 1 | 1 |
| Methylgallate                                  | 1 | 0 | 0 | 0 |
| Methylsuccinic acid                            | 1 | 1 | 1 | 1 |
| Pinocembrin                                    | 1 | 1 | 0 | 1 |
| Methyl eugenol                                 | 1 | 0 | 1 | 1 |
| Sodium Deoxycholate                            | 0 | 0 | 0 | 0 |
| )-3,4,5-trihydroxy-6-(hydroxymethyl)oxan-2-yl  | 0 | 0 | 0 | 0 |
| oxyethylidene]-6-[(2S,3R,4S,5S,6R)-3,4,5-tri   | 0 | 0 | 0 | 0 |
| rihydroxy-6-(hydroxymethyl)oxan-2-yl]oxy-2     | 0 | 0 | 1 | 1 |
| Phloridzin                                     | 1 | 0 | 1 | 1 |
| Genistein                                      | 1 | 0 | 0 | 0 |
| ι,5R)-2,3,6-trihydroxy-5,6-dimethylheptan-2-yl | 0 | 0 | 1 | 0 |
| Mannitol                                       | 0 | 0 | 0 | 0 |
| isoimperatorin                                 | 1 | 0 | 0 | 0 |
| Azelaic acid                                   | 0 | 1 | 0 | 0 |
| 13-HOTrE                                       | 1 | 1 | 0 | 0 |
| sweroside                                      | 0 | 0 | 1 | 0 |
| 3-Methoxycinnamic acid                         | 0 | 0 | 1 | 0 |
| Methyl hexadecanoate                           | 1 | 1 | 1 | 1 |
| Betulinic acid                                 | 1 | 0 | 0 | 1 |
| Succinic acid                                  | 1 | 1 | 1 | 1 |
| (2R,3R,4R,5R,6S)-3,4,5-trihydroxy-6-methyl     | 0 | 0 | 1 | 1 |
| 4-Aminophenol                                  | 0 | 0 | 0 | 1 |
| Artesunate                                     | 0 | 1 | 0 | 0 |
| trans-4-Coumaric acid                          | 0 | 0 | 0 | 0 |
| Curcumenol                                     | 1 | 1 | 1 | 1 |
| Ginkgolic acid (C13:0)                         | 0 | 0 | 0 | 1 |
| Taxifolin                                      | 1 | 1 | 1 | 0 |
| Lamiide                                        | 1 | 0 | 0 | 0 |
| Roccellic Acid                                 | 1 | 1 | 0 | 0 |
| Indolylmethyl glucosinolate + 1MeO             | 0 | 0 | 0 | 1 |

|                                                                           |   |   |   |   |
|---------------------------------------------------------------------------|---|---|---|---|
| aR)-1,10,11-trihydroxy-9-(hydroxymethyl)-2,                               | 0 | 0 | 0 | 1 |
| Pimelic acid                                                              | 1 | 0 | 0 | 0 |
| Tauroursodeoxycholic acid                                                 | 0 | 0 | 0 | 1 |
| Homoorientin                                                              | 0 | 0 | 0 | 0 |
| Daidzein                                                                  | 1 | 0 | 0 | 0 |
| Decanoic acid                                                             | 1 | 0 | 0 | 0 |
| -6-(4-ethenylphenoxy)-3,4,5-trihydroxyoxan-                               | 1 | 0 | 0 | 0 |
| 7-Hydroxycoumarin                                                         | 0 | 0 | 0 | 0 |
| 16-Hydroxyhexadecanoic acid                                               | 1 | 1 | 1 | 1 |
| Eicosenoic acid                                                           | 0 | 0 | 1 | 1 |
| Abietic acid                                                              | 0 | 1 | 0 | 0 |
| Caffeic acid                                                              | 1 | 1 | 1 | 1 |
| 4-Methylcatechol                                                          | 0 | 0 | 0 | 0 |
| Linoleic acid                                                             | 1 | 1 | 1 | 1 |
| 6,7-Dihydroxycoumarin                                                     | 1 | 1 | 0 | 1 |
| Heptadecanoic acid                                                        | 1 | 0 | 1 | 0 |
| Hydroxyvaleric Acid                                                       | 1 | 1 | 1 | 1 |
| Chenodeoxycholic acid                                                     | 0 | 0 | 0 | 0 |
| Ferulic Acid                                                              | 1 | 0 | 1 | 1 |
| Kaempferol 3-O-arabinoside                                                | 1 | 1 | 0 | 0 |
| Naringenin chalcone                                                       | 1 | 1 | 1 | 1 |
| Hederagenin                                                               | 1 | 0 | 1 | 1 |
| 5-Hydroxy-6,7-dimethoxyflavone                                            | 1 | 0 | 0 | 0 |
| Anthranilic acid                                                          | 0 | 0 | 1 | 0 |
| ,9,12a-heptamethyl-2,3,4,5,6,6a,7,8,8a,10,11,                             | 0 | 0 | 0 | 1 |
| osmanthuside H                                                            | 0 | 0 | 1 | 1 |
| Inermin                                                                   | 0 | 0 | 0 | 0 |
| Gallocatechin                                                             | 1 | 1 | 0 | 0 |
| Quercetin-3-O-galactoside                                                 | 0 | 0 | 0 | 1 |
| 3-phenyllactic acid                                                       | 1 | 0 | 0 | 0 |
| Fusidine                                                                  | 0 | 0 | 1 | 0 |
| Aesculin                                                                  | 1 | 0 | 1 | 1 |
| Phloretin-2'-O-glucoside                                                  | 0 | 1 | 0 | 1 |
| Phenylpyruvic acid                                                        | 1 | 1 | 1 | 1 |
| plumieride                                                                | 1 | 0 | 0 | 0 |
| Piceatannol                                                               | 0 | 0 | 0 | 0 |
| rhodioloside                                                              | 1 | 1 | 1 | 1 |
| Ginkgolic acid C17-1                                                      | 0 | 0 | 0 | 1 |
| Luteolin                                                                  | 1 | 0 | 0 | 1 |
| Purpurin                                                                  | 0 | 0 | 0 | 0 |
| FA 18:1+3O                                                                | 1 | 1 | 1 | 1 |
| Bayogenin                                                                 | 0 | 0 | 0 | 0 |
| Myristic acid                                                             | 0 | 0 | 0 | 0 |
| 3-O-Acetyl-16alpha-hydroxytrametenolic acid                               | 0 | 0 | 1 | 0 |
| 5-Ethoxy-10-gingerol                                                      | 0 | 0 | 0 | 0 |
| Stearic acid                                                              | 0 | 0 | 0 | 0 |
| Psicose                                                                   | 0 | 0 | 0 | 0 |
| hyl)-5,9-dimethyltetracyclo[11.2.1.0 <sup>1,10</sup> .0 <sup>4,9</sup> ]h | 1 | 1 | 1 | 1 |
| (hydroxymethyl)oxan-2-yl]oxyphenyl]-1,3,3a                                | 0 | 0 | 1 | 0 |
| p-Coumaraldehyde                                                          | 1 | 0 | 0 | 1 |
| naringenin-7-O-glucoside                                                  | 1 | 1 | 0 | 1 |

|                                               |   |   |   |   |
|-----------------------------------------------|---|---|---|---|
| Procyanidin B1                                | 1 | 0 | 1 | 0 |
| Protocatechuic acid                           | 1 | 1 | 1 | 1 |
| rutamarin                                     | 0 | 0 | 1 | 1 |
| coniferin                                     | 1 | 1 | 1 | 1 |
| Luteolin-4'-O-glucoside                       | 1 | 0 | 0 | 1 |
| Tectochrysin                                  | 0 | 0 | 0 | 0 |
| cirsimarin                                    | 0 | 0 | 0 | 1 |
| Apigenin 7-O-glucuronide                      | 0 | 0 | 0 | 0 |
| Arabitol                                      | 1 | 0 | 0 | 0 |
| Diosmetin                                     | 1 | 1 | 1 | 1 |
| 4-Hydroxyphenyllactic acid                    | 1 | 1 | 0 | 1 |
| (4-hydroxy-3-methoxyphenyl)methyl]butane-     | 0 | 0 | 0 | 0 |
| Quercetin 3-O-beta-D-Glucuronide              | 1 | 1 | 0 | 0 |
| syringin                                      | 0 | 0 | 0 | 1 |
| Linolenic acid                                | 0 | 0 | 0 | 0 |
| Icariin                                       | 1 | 0 | 0 | 0 |
| Pyrogallol                                    | 1 | 1 | 1 | 0 |
| Dioscin                                       | 1 | 0 | 0 | 0 |
| rhein                                         | 0 | 0 | 0 | 0 |
| Honokiol                                      | 1 | 0 | 0 | 0 |
| is-(hydroxymethyl)oxan-2-yl]oxy-1,4a,5,6,7,7ε | 1 | 1 | 0 | 1 |
| picein                                        | 0 | 0 | 1 | 1 |
| Tetrahydroxyxanthone                          | 0 | 0 | 1 | 0 |
| L-ARABITOL                                    | 0 | 0 | 0 | 0 |
| Catechol                                      | 0 | 1 | 0 | 1 |
| Quercetin                                     | 1 | 1 | 1 | 1 |
| 13-HODE                                       | 1 | 1 | 1 | 1 |
| cordycepin                                    | 0 | 1 | 1 | 1 |
| is,4,5-trihydroxy-6-(hydroxymethyl)oxan-2-yl] | 1 | 1 | 1 | 1 |
| Eriodictyol                                   | 1 | 1 | 1 | 1 |
| Ellagic acid                                  | 1 | 0 | 0 | 1 |
| Piperonylic Acid                              | 1 | 1 | 1 | 1 |
| arctiin                                       | 0 | 0 | 0 | 0 |
| MUCIC ACID                                    | 1 | 0 | 0 | 0 |
| Medicagenic acid                              | 0 | 0 | 1 | 0 |
| Danshensu                                     | 1 | 1 | 0 | 1 |
| Atractylenolide III                           | 0 | 0 | 0 | 0 |
| beta-Elemonic acid                            | 0 | 0 | 0 | 0 |
| Glomeratose A                                 | 0 | 1 | 1 | 0 |
| L-Pyroglutamic acid                           | 0 | 1 | 0 | 1 |
| is-hoxyphenyl)prop-2-enoyl]oxy-2,5-bis(hydrox | 1 | 0 | 0 | 1 |
| FA 18:1+10                                    | 1 | 1 | 1 | 1 |
| Baicalein                                     | 0 | 0 | 0 | 0 |
| Kaempferide                                   | 0 | 0 | 0 | 1 |
| Uridine                                       | 0 | 1 | 1 | 1 |
| Shikimic acid                                 | 1 | 0 | 1 | 0 |
| thyl-4-[2-(5-oxo-2H-furan-3-yl)ethyl]-2,3,5,6 | 0 | 1 | 0 | 0 |
| Adipic acid                                   | 1 | 1 | 1 | 1 |
| Neohesperidin                                 | 1 | 1 | 0 | 1 |
| Topotecan                                     | 1 | 0 | 0 | 0 |
| D(-)-Salicin                                  | 1 | 1 | 1 | 1 |



|                                                |   |   |   |   |
|------------------------------------------------|---|---|---|---|
| Morusin                                        | 0 | 0 | 0 | 0 |
| Schaftoside                                    | 1 | 0 | 0 | 1 |
| 1-O-b-D-glucopyranosyl sinapate                | 0 | 0 | 1 | 1 |
| 1-3-O-beta-glucopyranosyl-7-O-alpha-rhamno     | 1 | 1 | 0 | 1 |
| l,3R)-2,3,6-trihydroxy-6-methylheptan-2-yl]-6- | 1 | 1 | 1 | 1 |
| swertiamarin                                   | 0 | 0 | 1 | 0 |
| 1-Hydroxyanthraquinone                         | 0 | 0 | 0 | 0 |
| Eupafolin                                      | 1 | 0 | 0 | 1 |
| Eriodictyol-7-O-glucoside                      | 1 | 1 | 1 | 1 |
| Diosmin                                        | 1 | 0 | 1 | 1 |
| Nardosinone                                    | 0 | 0 | 0 | 0 |
| Deoxycholic acid                               | 0 | 0 | 0 | 0 |
| Coumaroyl quinic acid                          | 1 | 1 | 0 | 1 |
| Jasmonic acid                                  | 1 | 1 | 1 | 0 |
| Pedunculoside                                  | 0 | 0 | 1 | 1 |
| Aconitic Acid                                  | 0 | 1 | 1 | 1 |
| cymethyl)-1,2,6a,6b,9,12a-hexamethyl-2,3,4,5   | 0 | 0 | 1 | 0 |
| Gallic acid                                    | 1 | 1 | 1 | 1 |
| Antrapurol                                     | 0 | 0 | 0 | 0 |
| 4-hydroxyphenylacetic acid                     | 0 | 1 | 0 | 1 |
| Gentiopicroside                                | 0 | 0 | 0 | 0 |
| Sebacic acid                                   | 1 | 1 | 1 | 1 |
| 1,2-Dihydroxy anthraquinone                    | 0 | 0 | 0 | 0 |
| Malic acid                                     | 0 | 1 | 1 | 1 |
| Benzene-1,2,4-triol                            | 1 | 0 | 1 | 1 |
| Phenylalanine                                  | 0 | 1 | 0 | 1 |
| 1,7-bis(4-hydroxyphenyl)heptane-3,5-diol       | 1 | 0 | 0 | 0 |
| Madecassic acid                                | 0 | 0 | 1 | 0 |
| -dioxo-9H-pyrano[2,3-f]chromen-9-yl) (Z)-2-1   | 0 | 0 | 0 | 1 |
| Vicenin III                                    | 0 | 0 | 0 | 1 |
| D-Gluconic acid                                | 1 | 0 | 0 | 0 |
| Acetosyringone                                 | 0 | 0 | 1 | 0 |
| (-)-Catechin gallate                           | 1 | 0 | 0 | 0 |
| Dihydrokaempferol                              | 1 | 0 | 1 | 0 |
| i-trihydroxy-6-(hydroxymethyl)oxan-2-yl]oxy    | 0 | 1 | 1 | 1 |
| suberosin                                      | 0 | 0 | 0 | 0 |
| Acacetin-7-O-rutinoside                        | 1 | 1 | 0 | 1 |
| Diosmetin-7-O-beta-D-glucopyranoside           | 1 | 0 | 0 | 1 |
| 3-(2-HYDROXYPHENYL)PROPANOATE                  | 0 | 0 | 0 | 1 |
| ethoxyphenyl)-3,4,6,6a-tetrahydro-1H-furo[3,   | 0 | 1 | 0 | 1 |
| Isomangiferin                                  | 0 | 0 | 1 | 0 |
| Heneicosanoic acid                             | 0 | 0 | 1 | 1 |
| -2-yl]oxy-3,4,5-trihydroxyoxan-2-yl]methyl (   | 0 | 0 | 0 | 1 |
| Norcimifugin                                   | 1 | 0 | 0 | 0 |
| FA 18:2+10                                     | 1 | 1 | 0 | 1 |
| Isosakuranin                                   | 1 | 1 | 1 | 0 |
| ienyl)-6,8-bis[3,4,5-trihydroxy-6-(hydroxyme   | 0 | 0 | 0 | 1 |
| Kaempferol-3-O-rhamnoside-7-O-rhamnoside       | 1 | 0 | 0 | 0 |
| Enoxolone                                      | 0 | 0 | 1 | 0 |
| Pelargonidin-3-O-glucoside                     | 0 | 1 | 1 | 0 |
| Salicylic acid                                 | 0 | 0 | 0 | 0 |

|                                                                                                       |   |   |   |   |
|-------------------------------------------------------------------------------------------------------|---|---|---|---|
| Hesperetin                                                                                            | 1 | 1 | 0 | 0 |
| Trilobatin                                                                                            | 1 | 0 | 1 | 0 |
| Isofraxidin                                                                                           | 1 | 0 | 1 | 1 |
| Sucrose                                                                                               | 0 | 1 | 1 | 1 |
| 9-hydroxy-10,12-octadecadienoic acid                                                                  | 1 | 1 | 1 | 1 |
| Bruceine A                                                                                            | 1 | 0 | 1 | 0 |
| Apigenin-7-O-glucoside                                                                                | 0 | 0 | 1 | 1 |
| Sinigrin                                                                                              | 0 | 0 | 0 | 0 |
| 6-Gingerol                                                                                            | 0 | 1 | 1 | 1 |
| 3-O-Feruloylquinic acid                                                                               | 1 | 0 | 1 | 1 |
| methyl palmitoleate                                                                                   | 1 | 1 | 0 | 0 |
| 3-methoxy-4-(4-hydroxymethyl)-6-(E)-3-(4-hydroxyphenyl)prop-2-enyl chalcone B                         | 0 | 1 | 0 | 0 |
| linalool                                                                                              | 0 | 0 | 0 | 1 |
| Orsellinic acid                                                                                       | 0 | 0 | 0 | 0 |
| Benzoic acid + 10, O-Hex                                                                              | 0 | 1 | 0 | 1 |
| Taurochenodeoxycholic Acid                                                                            | 0 | 0 | 0 | 1 |
| 3-(4-hydroxymethyl)-1-propan-2-ylcyclohexanecarboxylic acid                                           | 0 | 0 | 0 | 0 |
| Sinapoyl aldehyde                                                                                     | 1 | 0 | 1 | 1 |
| Phellodendrine chloride                                                                               | 1 | 0 | 0 | 0 |
| 3-Methylglutaric acid                                                                                 | 1 | 1 | 0 | 1 |
| Cinobufagin                                                                                           | 0 | 0 | 0 | 0 |
| Higenamine                                                                                            | 1 | 0 | 0 | 0 |
| Vaccenic acid                                                                                         | 0 | 0 | 0 | 0 |
| Tectoridin                                                                                            | 1 | 0 | 0 | 0 |
| Gluconapin (3-butenylglucosinolate)                                                                   | 0 | 0 | 0 | 1 |
| 3,12a-heptamethyl-1,3,4,5,6,6a,7,8,8a,10,11,11a-dodecahydro-1H-benzocyclohepta[1,2-b:4,5-b']diazepine | 1 | 0 | 1 | 1 |
| 2-METHYLMALEATE                                                                                       | 1 | 1 | 1 | 1 |
| Isoscopoletin                                                                                         | 0 | 0 | 0 | 0 |
| 2-oxo-9,10-dihydropyrano[2,3-f]chromen-9-yl 2-O-methyl-β-D-glucopyranoside                            | 0 | 0 | 0 | 1 |
| Hexose + C13H17O3                                                                                     | 0 | 0 | 0 | 0 |
| Trans-Cinnamic acid                                                                                   | 1 | 0 | 0 | 0 |
| Suberic acid                                                                                          | 1 | 1 | 1 | 1 |
| 3,4,5-trihydroxy-6-methyloxan-2-one                                                                   | 0 | 0 | 0 | 0 |
| Jujuboside B                                                                                          | 0 | 0 | 0 | 0 |
| D-PANTOTHENIC ACID                                                                                    | 1 | 1 | 1 | 1 |
| Shanzhiside                                                                                           | 1 | 1 | 1 | 1 |
| Safflomin A                                                                                           | 0 | 0 | 0 | 1 |
| N-Acetyl-DL-glutamic acid                                                                             | 1 | 1 | 1 | 1 |
| vanillic acid                                                                                         | 1 | 1 | 1 | 1 |
| 3,4,5-trihydroxy-6-methyloxan-2-one                                                                   | 0 | 0 | 1 | 0 |
| 3-(4-hydroxy-3-methoxyphenyl)prop-2-enyl 2-O-methyl-β-D-glucopyranoside                               | 1 | 0 | 1 | 1 |
| Ajugol                                                                                                | 0 | 0 | 0 | 1 |
| Poricoic acid A                                                                                       | 0 | 1 | 0 | 1 |
| loganic acid                                                                                          | 0 | 0 | 1 | 0 |
| Linarin                                                                                               | 0 | 1 | 1 | 1 |
| Oenin                                                                                                 | 1 | 1 | 0 | 1 |
| Phenyl-beta-glucopyranoside                                                                           | 0 | 1 | 0 | 0 |
| Ginkgolic Acid C15:1                                                                                  | 0 | 0 | 0 | 0 |
| 9-HODE                                                                                                | 1 | 1 | 0 | 1 |
| Shanzhiside methyl ester                                                                              | 1 | 0 | 0 | 0 |
| Glabrolide                                                                                            | 1 | 1 | 0 | 1 |

|                                                 |   |   |   |   |
|-------------------------------------------------|---|---|---|---|
| ethyl)-1,2,6a,6b,9,12a-hexamethyl-2,3,4,5,6,6   | 0 | 0 | 1 | 1 |
| Typhaneoside                                    | 1 | 1 | 0 | 0 |
| Oleanoic Acid                                   | 0 | 0 | 0 | 1 |
| Asperulosidic acid                              | 1 | 1 | 1 | 1 |
| Lignoceric acid                                 | 0 | 0 | 1 | 1 |
| circimaritin                                    | 1 | 0 | 0 | 0 |
| Mulberrin                                       | 1 | 0 | 0 | 0 |
| Hyperoside                                      | 1 | 0 | 0 | 0 |
| Prostaglandin E1                                | 0 | 1 | 0 | 1 |
| 5,5S,6R)-3,4,5-trihydroxy-6-(hydroxymethyl)     | 0 | 0 | 0 | 0 |
| Chaulmoogric Acid                               | 1 | 1 | 1 | 1 |
| Maltopentaose                                   | 0 | 0 | 0 | 0 |
| Limonin                                         | 1 | 0 | 1 | 0 |
| Harpagoside                                     | 0 | 0 | 1 | 0 |
| 1,2,3,4,8,10,14-pentamethyl-2,3,5,6,7,9,11      | 0 | 0 | 0 | 0 |
| Naringin                                        | 1 | 1 | 1 | 0 |
| Flavonol base + 3O, O-Hex                       | 1 | 1 | 1 | 1 |
| Emodin                                          | 1 | 0 | 0 | 1 |
| kaempferol 7-neohesperidoside                   | 1 | 1 | 0 | 1 |
| 5-[(E)-3-(4-hydroxyphenyl)prop-2-enoyl]ox-      | 1 | 0 | 1 | 1 |
| 1a,2,3,4a,5,6,7a,7b-octahydrocyclopropa[h]az    | 0 | 0 | 0 | 0 |
| matairesinol                                    | 1 | 0 | 0 | 1 |
| aucubin                                         | 1 | 0 | 1 | 0 |
| Echinocystic acid                               | 0 | 0 | 1 | 0 |
| Acetyl-11-keto-beta-boswellic acid              | 0 | 0 | 0 | 0 |
| (EZ)-sinapic acid                               | 0 | 0 | 1 | 1 |
| Propyl gallate                                  | 1 | 0 | 1 | 0 |
| Eleutheroside E                                 | 1 | 0 | 1 | 1 |
| Polygalic acid                                  | 0 | 0 | 1 | 0 |
| LPC 16:0                                        | 0 | 0 | 0 | 0 |
| Tricosanoic acid                                | 0 | 0 | 1 | 1 |
| Glutamyltyrosine                                | 1 | 1 | 1 | 1 |
| Manninotriose                                   | 0 | 1 | 0 | 1 |
| MGMG 18:2                                       | 0 | 1 | 0 | 0 |
| Glutamylphenylalanine                           | 0 | 0 | 0 | 0 |
| oleuropein                                      | 0 | 0 | 0 | 0 |
| Helicid                                         | 1 | 0 | 1 | 0 |
| Piscidic Acid                                   | 1 | 1 | 1 | 1 |
| Baohuoside I                                    | 1 | 0 | 0 | 0 |
| Luteolin 7-glucuronide                          | 1 | 1 | 0 | 0 |
| 18-Beta-glycyrrhetinic acid                     | 1 | 0 | 1 | 0 |
| 3,4,5-trihydroxy-6-[[[(2S,3R,4S,5S)-3,4,5-trih- | 0 | 1 | 0 | 1 |
| ihydroxy-6-(hydroxymethyl)oxan-2-yl]oxybu       | 0 | 0 | 1 | 0 |
| Petunidin-3-O-beta-glucopyranoside              | 1 | 0 | 0 | 0 |
| oxy-6-(5-hydroxy-4-oxo-2-phenylchromen-7-       | 1 | 0 | 0 | 0 |
| Dihydroartemisinin                              | 0 | 0 | 0 | 0 |
| 3-methoxyphenyl)-6-(3-methylbut-2-enyl)-        | 1 | 0 | 0 | 1 |
| Orcinol gentiobioside                           | 1 | 0 | 1 | 1 |
| oxy-6-[[[(E)-3-(4-hydroxy-3,5-dimethoxyphenyl   | 0 | 0 | 1 | 0 |
| Palmitoleic acid                                | 1 | 0 | 0 | 1 |
| Nicotinic acid                                  | 1 | 1 | 0 | 1 |

|                                               |   |   |   |   |
|-----------------------------------------------|---|---|---|---|
| trans-Zeatin-riboside                         | 1 | 0 | 0 | 1 |
| Glabranine                                    | 1 | 0 | 1 | 0 |
| Phytolaccagenin                               | 0 | 0 | 0 | 0 |
| Aloenin                                       | 0 | 0 | 0 | 0 |
| 7-Hydroxy-4-methylcoumarin                    | 0 | 1 | 0 | 0 |
| 6-[[[(2S,3R,4S,5R)-3,4,5-trihydroxyoxan-2-yl] | 1 | 0 | 1 | 0 |
| Ginsenoside Ro                                | 0 | 0 | 1 | 0 |
| dehydroabietic acid                           | 1 | 0 | 0 | 0 |
| Pinoresinol 4-O-glucoside                     | 0 | 0 | 1 | 0 |
| 5-(4-hydroxyphenoxy)oxan-2-yl]methyl (E)-3-   | 0 | 1 | 0 | 1 |
| xanthohumol                                   | 1 | 1 | 1 | 1 |
| D-sorbosonic acid                             | 0 | 0 | 0 | 0 |
| 3,4,5-trimethoxycinnamic acid                 | 1 | 0 | 0 | 0 |
| Desmethylxanthohumol                          | 1 | 1 | 1 | 1 |
| y-2,5-bis(hydroxymethyl)oxolan-2-yl]oxy-3,4   | 0 | 1 | 0 | 0 |
| 2-Methoxy-4-vinylphenol                       | 1 | 0 | 0 | 1 |
| Lactose                                       | 0 | 0 | 0 | 0 |
| Melibiose                                     | 0 | 0 | 1 | 0 |
| Santonin                                      | 0 | 0 | 0 | 0 |
| Ethyl ferulate                                | 1 | 0 | 0 | 0 |
| ydroxy-4-(hydroxymethyl)oxolan-2-yl]oxyme     | 1 | 0 | 1 | 0 |
| columbianetin                                 | 0 | 0 | 0 | 0 |
| DGMG 18:3                                     | 1 | 1 | 1 | 1 |
| Nystose                                       | 0 | 0 | 0 | 0 |
| roxyphenyl)-3,5,7-trihydroxy-6-methyl-2,3-di  | 0 | 1 | 0 | 0 |
| ARTEMISIN                                     | 0 | 0 | 0 | 1 |
| Raffinose                                     | 1 | 0 | 1 | 0 |
| Bufalin                                       | 0 | 0 | 0 | 0 |
| Isoschaftoside                                | 0 | 0 | 0 | 0 |
| Pectolarigenin                                | 0 | 0 | 0 | 0 |
| ,6a,6b,9,9,12a-heptamethyl-2,3,4,5,6,6a,7,8,8 | 1 | 0 | 1 | 1 |
| Benzoic acid + 2O, O-Hex                      | 0 | 1 | 0 | 1 |
| Brazilin                                      | 1 | 0 | 0 | 1 |
| Harpagide                                     | 1 | 0 | 1 | 0 |
| .7,17-pentamethyl-3,6,16-trioxapentacyclo[9.1 | 0 | 0 | 1 | 0 |
| Atractyloside A                               | 0 | 0 | 0 | 0 |
| Caudatin                                      | 0 | 1 | 0 | 0 |
| Aurantio-obtusin beta-D-glucoside             | 1 | 0 | 0 | 1 |
| 3,4-Dihydroxyphenylethanol                    | 1 | 0 | 1 | 0 |
| Isoliquiritigenin                             | 0 | 0 | 0 | 0 |
| Arachidonic acid                              | 0 | 0 | 0 | 0 |
| Vicenin II                                    | 1 | 0 | 0 | 0 |
| Isopeonol                                     | 1 | 0 | 1 | 0 |
| L-Glutamic acid                               | 0 | 1 | 0 | 0 |
| Kaempferitrin                                 | 1 | 1 | 1 | 0 |
| Blinin                                        | 0 | 1 | 0 | 0 |
| Rhamnetin                                     | 1 | 0 | 0 | 0 |
| Casticin                                      | 0 | 0 | 0 | 1 |
| Grosvenorine                                  | 1 | 1 | 0 | 1 |
| Methyl vanillate                              | 1 | 0 | 0 | 1 |
| Apigenin-8-C-glucoside                        | 0 | 0 | 0 | 0 |

|                                              |   |   |   |   |
|----------------------------------------------|---|---|---|---|
| Digoxin                                      | 0 | 0 | 1 | 0 |
| 3R,4S,5S,6R)-3,4,5-trihydroxy-6-(hydroxyme   | 0 | 0 | 1 | 0 |
| Cryptochlorogenic acid                       | 1 | 0 | 1 | 1 |
| R,4S,5S,6R)-3,4,5-trihydroxy-6-(hydroxymet   | 0 | 0 | 0 | 0 |
| Androsin                                     | 0 | 1 | 0 | 0 |
| 5-pentahydroxy-2,6,14,17-tetramethyl-10-oxa  | 0 | 1 | 0 | 1 |
| Dihydrocucurbitacin F                        | 0 | 0 | 1 | 0 |
| Irigenin                                     | 0 | 1 | 0 | 1 |
| Nervonic acid                                | 0 | 0 | 1 | 1 |
| hydroxyphenyl)-6,8-bis(3,4,5-trihydroxyoxan- | 1 | 0 | 0 | 1 |
| Tenuifoliside B                              | 0 | 0 | 1 | 0 |
| Flavanomarein                                | 1 | 1 | 1 | 0 |
| ESTRIOL                                      | 1 | 0 | 1 | 1 |
| Benzyl alcohol + Hex-Pen                     | 1 | 1 | 1 | 0 |
| DIGOXIGENIN                                  | 0 | 0 | 0 | 0 |
| oxymethyl)-2,2,6a,6b,9,12a-hexamethyl-1,3,4, | 0 | 0 | 0 | 0 |
| etin-3-O-beta-D-glucose-7-O-beta-D-gentiob.  | 0 | 0 | 0 | 1 |
| bilobol                                      | 0 | 0 | 0 | 0 |
| 3-yloxy]-6-[[[(2S,3R,4R)-3,4-dihydroxy-4-(hy | 1 | 0 | 1 | 1 |
| oxymethyl)-2,2,6a,6b,9,12a-hexamethyl-1,3,4, | 0 | 0 | 1 | 0 |
| 11b-hexahydro-1H-benzo[a]quinolizin-2-yl]m   | 1 | 1 | 1 | 1 |
| Chrysanthemic Acid                           | 0 | 0 | 0 | 1 |
| Cichoric acid                                | 0 | 0 | 0 | 1 |
| oxo-2,3-dihydropyran-3-yl] (2E,4E,6S)-8-hydr | 0 | 1 | 0 | 0 |
| Bruceine D                                   | 1 | 0 | 0 | 1 |
| Naringenin                                   | 1 | 0 | 0 | 0 |
| Lobetyolin                                   | 0 | 0 | 0 | 0 |
| Ailanthone                                   | 0 | 0 | 0 | 0 |
| Glycocholic acid                             | 0 | 0 | 0 | 0 |
| Catalpol                                     | 1 | 1 | 1 | 1 |
| 7-6-(hydroxymethyl)oxan-2-yl]oxyoxan-2-yl]c  | 0 | 0 | 1 | 1 |
| Morroniside                                  | 0 | 0 | 1 | 0 |
| 3-Hydroxykynurenine                          | 1 | 1 | 0 | 0 |
| Phenylacetic acid + 2O, O-Hex                | 1 | 0 | 1 | 1 |
| Scopolin                                     | 1 | 0 | 0 | 1 |
| Cianidanol                                   | 1 | 0 | 0 | 0 |
| Complanatuside                               | 0 | 0 | 1 | 1 |
| eudesmin                                     | 1 | 0 | 0 | 0 |
| 9-Hydroxy-10,12,15-octadecatrienoic acid     | 1 | 1 | 1 | 1 |
| Pygenic acid A b                             | 0 | 0 | 1 | 0 |
| Tsugaric acid A                              | 1 | 0 | 1 | 0 |
| Xanthyletin                                  | 0 | 0 | 0 | 0 |
| isosakuranetin-7-O-neohesperidoside          | 0 | 0 | 1 | 0 |
| Chrysophanol 8-O-beta-D-glucoside            | 0 | 0 | 0 | 1 |
| Benzyl glucosinolate                         | 0 | 0 | 0 | 1 |
| 7-(4-hydroxyphenyl)-8-(3-methylbut-2-enyl)-2 | 1 | 0 | 0 | 0 |
| Tyrosine                                     | 1 | 1 | 0 | 1 |
| Pentose-Hexose + C10H17                      | 0 | 0 | 1 | 0 |
| Deoxyloganic acid                            | 0 | 0 | 0 | 0 |
| Triptophenolide                              | 0 | 0 | 0 | 0 |
| 7-methyl)oxolan-2-yl]oxy-3,4,5-trihydroxyoxa | 1 | 0 | 0 | 1 |

|                                                |   |   |   |   |
|------------------------------------------------|---|---|---|---|
| Isocitrate                                     | 1 | 0 | 1 | 0 |
| Eurycomalactone                                | 0 | 1 | 0 | 1 |
| methoxyphenyl)propan-2-yl]oxy-6-(hydroxyme     | 1 | 1 | 0 | 1 |
| phellopterin                                   | 1 | 1 | 0 | 0 |
| Bayogenin base + O-Hex-Hex                     | 0 | 0 | 1 | 0 |
| 1,3-Dicaffeoylquinic acid                      | 1 | 0 | 0 | 0 |
| 9,9,13,20-tetramethyl-4,8,15,18-tetraoxahexac  | 0 | 0 | 0 | 0 |
| Gallic acid hexoside                           | 1 | 1 | 1 | 0 |
| Verbascoside                                   | 1 | 0 | 0 | 1 |
| Di-n-butyl phthalate                           | 1 | 1 | 1 | 1 |
| oxy-2-(4-hydroxyphenyl)-7-methoxy-2,3-dihy     | 0 | 0 | 1 | 1 |
| xy-6-methyl-2-(3,4,5-trihydroxyphenyl)-2,3-c   | 1 | 1 | 1 | 0 |
| P-Anisic acid                                  | 1 | 1 | 1 | 1 |
| ,2,6a,6b,9,9,12a-heptamethyl-1,3,4,5,6,6a,7,8, | 0 | 0 | 0 | 0 |
| Strophanthidin                                 | 0 | 1 | 0 | 0 |
| Genipin 1-O-beta-D-gentiobioside               | 1 | 1 | 0 | 0 |
| Agaric Acid                                    | 0 | 1 | 0 | 0 |
| Rutin                                          | 1 | 1 | 1 | 1 |
| hydroxy-6-(hydroxymethyl)oxan-2-yl]-8-[(2S,    | 0 | 0 | 0 | 1 |
| Grandisin                                      | 0 | 0 | 0 | 0 |
| Quillaic acid                                  | 1 | 0 | 0 | 0 |
| rihydroxy-6-[[[(2S,3R,4S,5R)-3,4,5-trihydroxy  | 0 | 0 | 0 | 0 |
| (E)-3-(4-hydroxy-3-methoxyphenyl)prop-2-en     | 0 | 0 | 0 | 0 |
| Paeonolide                                     | 1 | 0 | 1 | 1 |
| Tiliroside                                     | 1 | 0 | 0 | 1 |
| Methylophiopogonanone A                        | 1 | 0 | 0 | 0 |
| Citraconic acid                                | 0 | 0 | 0 | 0 |
| 18alpha-glycyrrhetic acid                      | 0 | 0 | 1 | 0 |
| Coixol                                         | 0 | 1 | 0 | 1 |
| 8-tetramethyl-4-oxo-2,3-dihydropyrano[2,3-h]   | 0 | 0 | 0 | 0 |
| asperuloside                                   | 1 | 0 | 0 | 0 |
| Pseudolaric acid C                             | 0 | 1 | 0 | 1 |
| Protolichesterinic acid                        | 0 | 1 | 1 | 1 |
| Thioctic acid                                  | 1 | 1 | 1 | 1 |
| Orientin                                       | 1 | 1 | 0 | 1 |
| ydroxyphenyl)prop-2-enoyl]oxy}-1,3,5-trihyd    | 0 | 0 | 0 | 0 |
| Amygdalin                                      | 1 | 0 | 0 | 1 |
| Pechueloic Acid                                | 0 | 0 | 0 | 0 |
| Corilagin                                      | 0 | 0 | 0 | 1 |
| ASCORBIC ACID                                  | 1 | 0 | 0 | 0 |
| Isorhynchophylline                             | 0 | 1 | 1 | 0 |
| LEVODOPA                                       | 1 | 1 | 0 | 1 |
| L-Tryptophan                                   | 1 | 1 | 0 | 1 |
| ,4S)-2,2,4-trimethyl-3-oxabicyclo[2.2.2]octan  | 0 | 0 | 0 | 1 |
| Phloretin                                      | 1 | 1 | 0 | 0 |
| Gentiopicrin                                   | 0 | 0 | 1 | 1 |
| Dihydroartemisinic acid                        | 1 | 1 | 1 | 1 |
| -trimethyl-4,5a,6,8,8a,9-hexahydro-1H-azuler   | 0 | 1 | 1 | 0 |
| FA 9:1+10                                      | 0 | 1 | 1 | 0 |
| Dehydrotrametenolic acid                       | 1 | 0 | 1 | 1 |
| 7,8-Dihydroxycoumarin                          | 1 | 0 | 0 | 0 |

|                                                              |   |   |   |   |
|--------------------------------------------------------------|---|---|---|---|
| Spinosin                                                     | 1 | 0 | 0 | 0 |
| Dihydrocoumaroyl Hexoside                                    | 1 | 1 | 1 | 1 |
| Potassium 7-hydroxy-1-naphthalenesulfonate                   | 0 | 0 | 0 | 0 |
| Resibufogenin                                                | 0 | 0 | 0 | 0 |
| 5,9,9,13,19,20-heptamethyl-24-oxahexacyclo                   | 0 | 1 | 0 | 1 |
| Kawain                                                       | 0 | 0 | 0 | 0 |
| 3-(4-(hydroxymethyl)oxolan-2-yl]oxy-2-(hydr                  | 0 | 0 | 0 | 0 |
| Forsythoside E                                               | 1 | 0 | 1 | 0 |
| Biotin                                                       | 0 | 0 | 0 | 0 |
| 12:4+3O fatty acyl hexoside                                  | 1 | 0 | 0 | 0 |
| 6"-O-Acetylglycitin                                          | 1 | 0 | 1 | 0 |
| Afzelin                                                      | 1 | 0 | 0 | 1 |
| Embelin                                                      | 0 | 0 | 0 | 0 |
| Epigallocatechin                                             | 1 | 0 | 0 | 0 |
| trifolirhizin                                                | 0 | 0 | 0 | 0 |
| Loganin                                                      | 0 | 0 | 0 | 0 |
| Icaritin                                                     | 1 | 0 | 0 | 0 |
| Syringic Acid                                                | 0 | 0 | 1 | 1 |
| 5Alpha-Cholestanol                                           | 0 | 0 | 0 | 0 |
| Mesaconic acid                                               | 1 | 1 | 1 | 1 |
| 3-(4-(2-methylbut-3-en-2-yl)pyrano[3,2-                      | 1 | 0 | 0 | 0 |
| 5-Hydroxytryptophan                                          | 0 | 1 | 0 | 1 |
| Noreugenin                                                   | 0 | 0 | 0 | 1 |
| 1-O-trans-cinnamoyl-beta-D-glucopyranose                     | 0 | 0 | 1 | 1 |
| Paracetamol                                                  | 0 | 0 | 1 | 0 |
| 3-(4-(hydroxymethyl)oxolan-2-yl]oxy-2,5a,6,6a-tetrahydro-1b  | 0 | 0 | 0 | 0 |
| 3-(4-Hydroxyphenyl)-1-propanol                               | 0 | 1 | 1 | 0 |
| Usnic acid                                                   | 1 | 0 | 1 | 1 |
| DiffRACTIC acid                                              | 0 | 0 | 1 | 1 |
| Diethyl-phthalate                                            | 1 | 1 | 0 | 0 |
| Pectolarin                                                   | 0 | 0 | 0 | 0 |
| Leucoside                                                    | 1 | 1 | 1 | 0 |
| Saikosaponin D                                               | 1 | 0 | 0 | 0 |
| Narcissoside                                                 | 0 | 1 | 0 | 0 |
| Geranic acid                                                 | 0 | 0 | 0 | 0 |
| DIMETHYLCAFFEIC ACID                                         | 0 | 0 | 0 | 0 |
| 4-Methoxysalicylic acid                                      | 1 | 1 | 1 | 1 |
| Geniposidic acid                                             | 1 | 0 | 1 | 1 |
| 3-(4-(hydroxymethyl)hept-3-en-2-yl]-6,10-dimethyl-16,17-diox | 0 | 0 | 0 | 0 |
| Ginkgolide A                                                 | 0 | 0 | 0 | 0 |
| Fraxetin                                                     | 0 | 0 | 0 | 0 |
| Alisol A 24-acetate                                          | 0 | 0 | 0 | 1 |
| 3-(4-(2-(7-propan-2-yl-2,3,4,4b,5,6,10,10a-octahydro         | 0 | 0 | 0 | 1 |
| 4S,5S,6R)-3,4,5-trihydroxy-6-(hydroxymethy                   | 0 | 0 | 1 | 0 |
| l-(4-(2-(4-hydroxyphenyl)prop-2-enyl]oxy-1,4,5-tri           | 1 | 0 | 1 | 1 |
| ALPHA-AMINOADIPATE                                           | 0 | 1 | 0 | 0 |
| Podophyllin Acetate                                          | 1 | 0 | 0 | 0 |
| 3-(4-(2-(4-(ethoxyphenyl)-4-(hydroxymethyl)oxolan-3-yl       | 0 | 1 | 1 | 1 |
| 1,4-bis(4-(2-(4-(dihydroxyphenyl)-3,7-dihydroxy-2,3-dihydro  | 1 | 0 | 1 | 0 |
| xy-4-prop-2-enylphenoxy)-1-hydroxypropyl]-                   | 1 | 0 | 1 | 1 |
| hydroxy-1,4a-dimethyl-2-oxo-7-propan-2-yl-1(                 | 0 | 1 | 0 | 1 |





|                                              |   |   |   |   |
|----------------------------------------------|---|---|---|---|
| ,3R,4R)-3,4-dihydroxy-4-(hydroxymethyl)tetr  | 0 | 0 | 0 | 1 |
| 8-Desoxygartanin                             | 1 | 1 | 1 | 1 |
| Paeoniflorin                                 | 1 | 0 | 1 | 1 |
| (-)-Syringaresinol di-O-glucoside            | 1 | 0 | 0 | 0 |
| Wedelolactone                                | 1 | 0 | 0 | 1 |
| Hematoxylin                                  | 0 | 0 | 0 | 0 |
| Methyl 3,4,5-trimethoxycinnamate             | 0 | 0 | 0 | 1 |
| )-5,8a-dimethyl-2-methylidene-3,4,4a,6,7,8-h | 0 | 0 | 1 | 0 |
| Dihydrocapsaicin                             | 1 | 1 | 1 | 1 |
| Pentadecanoic acid                           | 0 | 0 | 0 | 1 |
| 10-Deacetylbaecatins III                     | 0 | 1 | 0 | 0 |
| Bilobalide                                   | 0 | 0 | 0 | 0 |
| Quercetin-3-Arabinoside                      | 1 | 1 | 0 | 1 |
| 3,4-di-O-caffeoylquinic acid                 | 1 | 0 | 1 | 0 |
| phenyl)-3,5-dihydroxy-3,4-dihydro-2H-chrom   | 0 | 0 | 0 | 0 |
| Dihydroresveratrol                           | 1 | 1 | 0 | 1 |
| Flemiphilippinin A                           | 1 | 0 | 0 | 0 |
| Ingenol                                      | 1 | 0 | 0 | 1 |
| alternariol monomethyl ether                 | 0 | 0 | 0 | 0 |
| Forskolin                                    | 1 | 0 | 0 | 1 |
| Procyanidin B2                               | 0 | 0 | 0 | 0 |
| Astringin                                    | 0 | 0 | 1 | 1 |
| Taxifolin 7-rhamnoside                       | 0 | 0 | 0 | 0 |
| Stachyose                                    | 0 | 0 | 1 | 0 |
| 3-coumaric acid                              | 1 | 0 | 1 | 1 |
| Didymin                                      | 0 | 0 | 1 | 1 |
| Rotenone                                     | 1 | 1 | 1 | 1 |
| Valine                                       | 0 | 0 | 0 | 0 |
| Isoliquiritin                                | 0 | 0 | 0 | 0 |
| Tagatose                                     | 0 | 0 | 0 | 0 |
| Docosahexanoic acid                          | 0 | 0 | 0 | 0 |
| Prulaurasin                                  | 1 | 1 | 1 | 1 |
| 3,4-Dihydroxyphenylalanine                   | 0 | 1 | 0 | 0 |
| Coumarin base + 1O, 1MeO, O-Hex              | 1 | 1 | 1 | 1 |
| Oxyresveratrol                               | 0 | 0 | 0 | 0 |
| (+/-)-Jasmonic acid                          | 0 | 0 | 0 | 1 |
| 9(S)-HOTrE                                   | 1 | 1 | 1 | 1 |
| 3,5S,6R)-3,4,5-trihydroxy-6-(hydroxymethyl)  | 1 | 0 | 1 | 0 |
| Cefalexin                                    | 1 | 1 | 1 | 0 |
| Quercetin-3-O-glucose-6"-acetate             | 1 | 1 | 1 | 1 |
| Isopropyl 4-Hydroxybenzoate                  | 1 | 1 | 0 | 0 |
| Isorhamnetin-3-O-nehesperidine               | 1 | 1 | 0 | 1 |
| Camelliaside B                               | 0 | 1 | 0 | 0 |
| oxymethyl)-5,6-dimethyl-3,4,4a,6,7,8-hexahyc | 1 | 0 | 0 | 1 |
| Kushenol F                                   | 1 | 0 | 1 | 0 |
| Gossypetin-8-C-glucoside                     | 0 | 0 | 0 | 0 |
| Azadirachtin                                 | 1 | 0 | 0 | 0 |
| Procyanidin A2                               | 0 | 1 | 1 | 0 |
| Octyl gallate                                | 0 | 0 | 0 | 0 |
| gamma-mangostin                              | 0 | 1 | 1 | 0 |
| 9-HOTrE                                      | 0 | 1 | 0 | 0 |

|                                                            |   |   |   |   |
|------------------------------------------------------------|---|---|---|---|
| Cyasterone                                                 | 0 | 1 | 0 | 0 |
| Peucedanol                                                 | 0 | 0 | 0 | 1 |
| 1R,5R,6S)-3,4,5-trihydroxy-6-methyloxan-2-y                | 0 | 0 | 0 | 1 |
| D(-)-Gulono-gamma-lactone                                  | 1 | 1 | 1 | 1 |
| 17-Hydroxyisolathyrol                                      | 1 | 0 | 0 | 0 |
| Gedunin                                                    | 1 | 0 | 0 | 0 |
| hydroxyphenyl)ethoxy]-3,5-dihydroxy-6-(hyd                 | 1 | 0 | 1 | 1 |
| 13-alpha-(21)-Epoxyeurycomanone                            | 1 | 1 | 0 | 0 |
| Pristimerin                                                | 0 | 1 | 0 | 0 |
| abscisic acid                                              | 0 | 0 | 1 | 1 |
| PAEDEROSIDE                                                | 1 | 0 | 0 | 0 |
| Morellic acid                                              | 0 | 1 | 0 | 1 |
| Chikusetsusaponin IV                                       | 1 | 0 | 0 | 0 |
| Gibberellic acid                                           | 0 | 0 | 1 | 1 |
| Capsaicin                                                  | 1 | 1 | 0 | 1 |
| hirsutanone                                                | 1 | 0 | 0 | 0 |
| Farrerol                                                   | 1 | 0 | 0 | 0 |
| Momordin Ic                                                | 0 | 0 | 1 | 0 |
| Epicatechin                                                | 1 | 0 | 0 | 0 |
| methoxyphenyl)methyl]-3-(hydroxymethyl)o                   | 1 | 0 | 1 | 1 |
| Kukoamine B                                                | 0 | 0 | 0 | 0 |
| VERATRIC ACID                                              | 1 | 0 | 0 | 0 |
| Tenuifoliside A                                            | 0 | 0 | 1 | 0 |
| methoxy-10-(3,4,5-trihydroxyoxan-2-yl)oxy-1,3,             | 1 | 0 | 1 | 1 |
| Xylose                                                     | 0 | 1 | 0 | 0 |
| dihydroferulic acid                                        | 1 | 1 | 1 | 1 |
| Rhaponticin                                                | 0 | 0 | 0 | 0 |
| Phenethyl caffeate                                         | 0 | 0 | 0 | 1 |
| oxy- $\alpha$ -L-mannopyranosyl-(1->4)-[ $\beta$ -D-glucop | 0 | 1 | 0 | 0 |
| -(beta-D-glucopyranosyloxy)-3,4-dihydro-, al               | 0 | 1 | 0 | 1 |
| Hispidulin                                                 | 0 | 0 | 0 | 0 |
| Syringetin-3-O-galactoside                                 | 1 | 1 | 0 | 0 |
| Puerarin                                                   | 0 | 0 | 0 | 0 |
| Hastatoside                                                | 1 | 0 | 0 | 0 |
| 2-Chloro-DL-Phenylalanine                                  | 1 | 1 | 1 | 1 |

1 means that the ingredient was detected in the corresponding herb, 0 means that the ingredient was not detected in the corresponding herb

**Supplement table 3.**Compounds in HYJDF with OB > 30% and DL > 0.18.

| No | MOL ID    | Herbal Compound                                                                                                | OB    | DL   | Herb       |
|----|-----------|----------------------------------------------------------------------------------------------------------------|-------|------|------------|
| 1  | MOL000098 | quercetin                                                                                                      | 46.43 | 0.28 | EBM/PS/TAL |
| 2  | MOL000422 | kaempferol                                                                                                     | 41.88 | 0.24 | EBM/PS/TAL |
| 3  | MOL000359 | sitosterol                                                                                                     | 36.91 | 0.75 | EBM/PS/SC  |
| 4  | MOL000358 | beta-sitosterol                                                                                                | 36.91 | 0.75 | PS/SC/TAL  |
| 5  | MOL000006 | luteolin                                                                                                       | 36.16 | 0.25 | EBM/PS     |
| 6  | MOL001510 | 24-epicampesterol                                                                                              | 37.58 | 0.71 | EBM        |
| 7  | MOL001645 | Linoleyl acetate                                                                                               | 42.1  | 0.2  | EBM        |
| 8  | MOL001771 | poriferast-5-en-3beta-ol                                                                                       | 36.91 | 0.75 | EBM        |
| 9  | MOL001792 | DFV                                                                                                            | 32.76 | 0.18 | EBM        |
| 10 | MOL003044 | Chryseriol                                                                                                     | 35.85 | 0.27 | EBM        |
| 11 | MOL003542 | 8-Isopentenyl-kaempferol                                                                                       | 38.04 | 0.39 | EBM        |
| 12 | MOL004367 | olivil                                                                                                         | 62.23 | 0.41 | EBM        |
| 13 | MOL004373 | Anhydroicaritin                                                                                                | 45.41 | 0.44 | EBM        |
| 14 | MOL004380 | C-Homoerythrinan, 1,6-didehydro-3,15,16-trimethoxy-, (3.beta.)-                                                | 39.14 | 0.49 | EBM        |
| 15 | MOL004382 | Yinyanghuo A                                                                                                   | 56.96 | 0.77 | EBM        |
| 16 | MOL004384 | Yinyanghuo C                                                                                                   | 45.67 | 0.5  | EBM        |
| 17 | MOL004386 | Yinyanghuo E                                                                                                   | 51.63 | 0.55 | EBM        |
| 18 | MOL004388 | 6-hydroxy-11,12-dimethoxy-2,2-dimethyl-1,8-dioxo-2,3,4,8-tetrahydro-1H-<br>isochromeno[3,4-h]isoquinolin-2-ium | 60.64 | 0.66 | EBM        |
| 19 | MOL004391 | 8-(3-methylbut-2-enyl)-2-TALenyl-chromone                                                                      | 48.54 | 0.25 | EBM        |
| 20 | MOL004394 | Anhydroicaritin-3-O-alpha-L-rhamnoside                                                                         | 41.58 | 0.61 | EBM        |
| 21 | MOL004396 | 1,2-bis(4-hydroxy-3-methoxyTALenyl)propan-1,3-diol                                                             | 52.31 | 0.22 | EBM        |
| 22 | MOL004425 | Icariin                                                                                                        | 41.58 | 0.61 | EBM        |
| 23 | MOL004427 | Icariside A7                                                                                                   | 31.91 | 0.86 | EBM        |
| 24 | MOL000622 | Magnograndiolide                                                                                               | 63.71 | 0.19 | EBM        |
| 25 | MOL001677 | asperglaucide                                                                                                  | 58.02 | 0.52 | PS         |
| 26 | MOL001678 | bolusanthol B                                                                                                  | 39.94 | 0.41 | PS         |
| 27 | MOL001790 | Linarin                                                                                                        | 39.84 | 0.71 | PS         |
| 28 | MOL001689 | acacetin                                                                                                       | 34.97 | 0.24 | PS         |
| 29 | MOL002322 | isovitexin                                                                                                     | 31.29 | 0.72 | PS         |
| 30 | MOL001697 | Sinoacutine                                                                                                    | 63.39 | 0.53 | PS         |
| 31 | MOL000449 | Stigmasterol                                                                                                   | 43.83 | 0.76 | PS         |
| 32 | MOL007923 | 2-(4-hydroxyTALenyl)ethyl (E)-3-(4-hydroxyTALenyl)prop-2-enoate                                                | 93.36 | 0.21 | SC         |
| 33 | MOL000096 | (-)-catechin                                                                                                   | 49.68 | 0.24 | SC         |
| 34 | MOL001040 | (2R)-5,7-dihydroxy-2-(4-hydroxyTALenyl)chroman-4-one                                                           | 42.36 | 0.21 | TAL        |
| 35 | MOL001439 | arachidonic acid                                                                                               | 45.57 | 0.2  | TAL        |
| 36 | MOL000354 | isorhamnetin                                                                                                   | 49.6  | 0.31 | TAL        |

**Supplement table 4. EM related genes targeted by active compound of HYJDF.**

| <b>No.</b> | <b>UniProtKB</b> | <b>Gene Symbol</b> | <b>Protein Names</b>                                          | <b>Status</b> |
|------------|------------------|--------------------|---------------------------------------------------------------|---------------|
| 1          | O15439           | ABCC4              | ATP-binding cassette sub-family C member 4                    | reviewed      |
| 2          | Q9UNQ0           | ABCG2              | ad substrate specificity ATP-binding cassette transporter ABC | reviewed      |
| 3          | P35869           | AHR                | Aryl hydrocarbon receptor                                     | reviewed      |
| 4          | P15121           | AKR1B1             | Aldo-keto reductase family 1 member B1                        | reviewed      |
| 5          | P42330           | AKR1C3             | Aldo-keto reductase family 1 member C3                        | reviewed      |
| 6          | P31749           | AKT1               | RAC-alpha serine/threonine-protein kinase                     | reviewed      |
| 7          | P09917           | ALOX5              | Polyunsaturated fatty acid 5-lipoxygenase                     | reviewed      |
| 8          | P10275           | AR                 | Androgen receptor                                             | reviewed      |
| 9          | Q07812           | BAX                | Apoptosis regulator BAX                                       | reviewed      |
| 10         | P10415           | BCL2               | Apoptosis regulator Bcl-2                                     | reviewed      |
| 11         | Q07817           | BCL2L1             | Bcl-2-like protein 1                                          | reviewed      |
| 12         | O15392           | BIRC5              | Baculoviral IAP repeat-containing protein 5                   | reviewed      |
| 13         | P42574           | CASP3              | Caspase-3                                                     | reviewed      |
| 14         | Q14790           | CASP8              | Caspase-8                                                     | reviewed      |
| 15         | P55211           | CASP9              | Caspase-9                                                     | reviewed      |
| 16         | P13500           | CCL2               | C-C motif chemokine 2                                         | reviewed      |
| 17         | P20248           | CCNA2              | Cyclin-A2                                                     | reviewed      |
| 18         | P14635           | CCNB1              | G2/mitotic-specific cyclin-B1                                 | reviewed      |
| 19         | P24385           | CCND1              | G1/S-specific cyclin-D1                                       | reviewed      |
| 20         | P29965           | CD40LG             | CD40 ligand                                                   | reviewed      |
| 21         | P38936           | CDKN1A             | Cyclin-dependent kinase inhibitor 1                           | reviewed      |
| 22         | P42771           | CDKN2A             | Cyclin-dependent kinase inhibitor 2A                          | reviewed      |
| 23         | P11597           | CETP               | Cholesteryl ester transfer protein                            | reviewed      |
| 24         | P36544           | CHRNA7             | Neuronal acetylcholine receptor subunit alpha-7               | reviewed      |
| 25         | O15111           | CHUK               | Inhibitor of nuclear factor kappa-B kinase subunit alpha      | reviewed      |
| 26         | O14493           | CLDN4              | Claudin-4                                                     | reviewed      |
| 27         | P02452           | COL1A1             | Collagen alpha-1                                              | reviewed      |
| 28         | P02741           | CRP                | C-reactive protein [Cleaved into: C-reactive protein          | reviewed      |
| 29         | P07339           | CTSD               | Cathepsin D                                                   | reviewed      |
| 30         | P02778           | CXCL10             | C-X-C motif chemokine 10                                      | reviewed      |
| 31         | O14625           | CXCL11             | C-X-C motif chemokine 11                                      | reviewed      |
| 32         | P10145           | CXCL8              | Interleukin-8                                                 | reviewed      |
| 33         | P11511           | CYP19A1            | Aromatase                                                     | reviewed      |
| 34         | P04798           | CYP1A1             | Cytochrome P450 1A1                                           | reviewed      |

|    |        |        |                                                   |          |
|----|--------|--------|---------------------------------------------------|----------|
| 35 | P05177 | CYP1A2 | Cytochrome P450 1A2                               | reviewed |
| 36 | Q16678 | CYP1B1 | Cytochrome P450 1B1                               | reviewed |
| 37 | P08684 | CYP3A4 | Cytochrome P450 3A4                               | reviewed |
| 38 | P27487 | DPP4   | Dipeptidyl peptidase 4                            | reviewed |
| 39 | P14416 | DRD2   | Dopamine receptor D2                              | reviewed |
| 40 | P01133 | EGF    | Pro-epidermal growth factor                       | reviewed |
| 41 | P00533 | EGFR   | Epidermal growth factor receptor                  | reviewed |
| 42 | P56537 | EIF6   | Eukaryotic translation initiation factor 6        | reviewed |
| 43 | P19419 | ELK1   | ETS domain-containing protein Elk-1               | reviewed |
| 44 | P04626 | ERBB2  | Receptor tyrosine-protein kinase erbB-2           | reviewed |
| 45 | P03372 | ESR1   | Estrogen receptor                                 | reviewed |
| 46 | Q92731 | ESR2   | Estrogen receptor beta                            | reviewed |
| 47 | P00734 | F2     | Prothrombin                                       | reviewed |
| 48 | P13726 | F3     | Tissue factor                                     | reviewed |
| 49 | P48023 | FASLG  | Tumor necrosis factor ligand superfamily member 6 | reviewed |
| 50 | P01100 | FOS    | Proto-oncogene c-Fos                              | reviewed |
| 51 | P17302 | GJA1   | Gap junction alpha-1 protein                      | reviewed |
| 52 | P49841 | GSK3B  | Glycogen synthase kinase-3 beta                   | reviewed |
| 53 | P09488 | GSTM1  | Glutathione S-transferase Mu 1                    | reviewed |
| 54 | P09211 | GSTP1  | Glutathione S-transferase P                       | reviewed |
| 55 | Q16665 | HIF1A  | Hypoxia-inducible factor 1-alpha                  | reviewed |
| 56 | P09601 | HMOX1  | Heme oxygenase 1                                  | reviewed |
| 57 | P05362 | ICAM1  | Intercellular adhesion molecule 1                 | reviewed |
| 58 | P01579 | IFNG   | Interferon gamma                                  | reviewed |
| 59 | P01344 | IGF2   | Insulin-like growth factor II                     | reviewed |
| 60 | P17936 | IGFBP3 | Insulin-like growth factor-binding protein 3      | reviewed |
| 61 | P22301 | IL10   | Interleukin-10                                    | reviewed |
| 62 | P01583 | IL1A   | Interleukin-1 alpha                               | reviewed |
| 63 | P01584 | IL1B   | Interleukin-1 beta                                | reviewed |
| 64 | P60568 | IL2    | Interleukin-2                                     | reviewed |
| 65 | P05112 | IL4    | Interleukin-4                                     | reviewed |
| 66 | P05231 | IL6    | Interleukin-6                                     | reviewed |
| 67 | P05412 | JUN    | Transcription factor AP-1                         | reviewed |
| 68 | P35968 | KDR    | Vascular endothelial growth factor receptor 2     | reviewed |
| 69 | P11137 | MAP2   | Microtubule-associated protein 2                  | reviewed |
| 70 | P28482 | MAPK1  | Mitogen-activated protein kinase 1                | reviewed |

|     |        |        |                                                               |          |
|-----|--------|--------|---------------------------------------------------------------|----------|
| 71  | Q16539 | MAPK14 | Mitogen-activated protein kinase 14                           | reviewed |
| 72  | P45983 | MAPK8  | Mitogen-activated protein kinase 8                            | reviewed |
| 73  | Q07820 | MCL1   | Induced myeloid leukemia cell differentiation protein Mcl-1   | reviewed |
| 74  | Q00987 | MDM2   | E3 ubiquitin-protein ligase Mdm2                              | reviewed |
| 75  | P08581 | MET    | Hepatocyte growth factor receptor                             | reviewed |
| 76  | P03956 | MMP1   | Interstitial collagenase                                      | reviewed |
| 77  | P08253 | MMP2   | 72 kDa type IV collagenase                                    | reviewed |
| 78  | P08254 | MMP3   | Stromelysin-1                                                 | reviewed |
| 79  | P14780 | MMP9   | Matrix metalloproteinase-9                                    | reviewed |
| 80  | P05164 | MPO    | Myeloperoxidase                                               | reviewed |
| 81  | P01106 | MYC    | Myc proto-oncogene protein                                    | reviewed |
| 82  | Q15788 | NCOA1  | Nuclear receptor coactivator 1                                | reviewed |
| 83  | Q15596 | NCOA2  | Nuclear receptor coactivator 2                                | reviewed |
| 84  | Q16236 | NFE2L2 | Nuclear factor erythroid 2-related factor 2                   | reviewed |
| 85  | P25963 | NFKBIA | NF-kappa-B inhibitor alpha                                    | reviewed |
| 86  | P29475 | NOS1   | Nitric oxide synthase, brain                                  | reviewed |
| 87  | P35228 | NOS2   | Nitric oxide synthase, inducible                              | reviewed |
| 88  | P29474 | NOS3   | Nitric oxide synthase, endothelial                            | reviewed |
| 89  | P04150 | NR3C1  | Glucocorticoid receptor                                       | reviewed |
| 90  | P08235 | NR3C2  | Mineralocorticoid receptor                                    | reviewed |
| 91  | P35372 | OPRM1  | Mu-type opioid receptor                                       | reviewed |
| 92  | P12004 | PCNA   | Proliferating cell nuclear antigen                            | reviewed |
| 93  | P16284 | PECAM1 | Platelet endothelial cell adhesion molecule                   | reviewed |
| 94  | P06401 | PGR    | Progesterone receptor                                         | reviewed |
| 95  | P48736 | PIK3CG | dylinositol 4,5-bisphosphate 3-kinase catalytic subunit gamma | reviewed |
| 96  | P00750 | PLAT   | Tissue-type plasminogen activator                             | reviewed |
| 97  | P00749 | PLAU   | Urokinase-type plasminogen activator                          | reviewed |
| 98  | P27169 | PON1   | Serum paraoxonase/arylesterase 1                              | reviewed |
| 99  | Q07869 | PPARA  | Peroxisome proliferator-activated receptor alpha              | reviewed |
| 100 | P37231 | PPARG  | Peroxisome proliferator-activated receptor gamma              | reviewed |
| 101 | P05771 | PRKCB  | Protein kinase C beta type                                    | reviewed |
| 102 | P60484 | PTEN   | 3,4,5-trisphosphate 3-phosphatase and dual-specificity protei | reviewed |
| 103 | P43115 | PTGER3 | Prostaglandin E2 receptor EP3 subtype                         | reviewed |
| 104 | O14684 | PTGES  | Prostaglandin E synthase                                      | reviewed |
| 105 | P23219 | PTGS1  | Prostaglandin G/H synthase 1                                  | reviewed |
| 106 | P35354 | PTGS2  | Prostaglandin G/H synthase 2                                  | reviewed |

|     |        |          |                                                                                |          |
|-----|--------|----------|--------------------------------------------------------------------------------|----------|
| 107 | P04049 | RAF1     | RAF proto-oncogene serine/threonine-protein kinase                             | reviewed |
| 108 | P06400 | RB1      | Retinoblastoma-associated protein                                              | reviewed |
| 109 | Q04206 | RELA     | Transcription factor p65                                                       | reviewed |
| 110 | P19793 | RXRA     | Retinoic acid receptor RXR-alpha                                               | reviewed |
| 111 | P16581 | SELE     | E-selectin                                                                     | reviewed |
| 112 | P05121 | SERPINE1 | Plasminogen activator inhibitor 1                                              | reviewed |
| 113 | P14672 | SLC2A4   | Solute carrier family 2, facilitated glucose transporter member                | reviewed |
| 114 | P31645 | SLC6A4   | Sodium-dependent serotonin transporter                                         | reviewed |
| 115 | P03973 | SLPI     | Antileukoproteinase                                                            | reviewed |
| 116 | P00441 | SOD1     | Superoxide dismutase [Cu-Zn]                                                   | reviewed |
| 117 | P04179 | SOD2     | Superoxide dismutase [Mn], mitochondrial                                       | reviewed |
| 118 | Q9BX95 | SPP1     | Sphingosine-1-phosphate phosphatase 1                                          | reviewed |
| 119 | P01137 | TGFB1    | Transforming growth factor beta-1 proprotein [Cleaved into: Latency-associated | reviewed |
| 120 | P01375 | TNF      | Tumor necrosis factor                                                          | reviewed |
| 121 | P20333 | TNFRSF1B | Tumor necrosis factor receptor superfamily member 1B                           | reviewed |
| 122 | P11388 | TOP2A    | DNA topoisomerase 2-alpha                                                      | reviewed |
| 123 | Q02880 | TOP2B    | DNA topoisomerase 2-beta                                                       | reviewed |
| 124 | P04637 | TP53     | Cellular tumor antigen p53                                                     | reviewed |
| 125 | Q8NER1 | TRPV1    | Transient receptor potential cation channel subfamily V member 1               | reviewed |
| 126 | P19320 | VCAM1    | Vascular cell adhesion protein 1                                               | reviewed |
| 127 | P15692 | VEGFA    | Vascular endothelial growth factor A                                           | reviewed |
| 128 | P47989 | XDH      | Xanthine dehydrogenase/oxidase [Includes: Xanthine dehydrogenase]              | reviewed |

Supplement table 5. KEGG Analysis

| Term ID       | Term description                             | ListHit | ListTotal | PopHit | PopTotal | GeneRatio   | BgRatio     | enrichment scor | GeneIds                  | GeneSymbol | p-value     | FDR bh      | Classification level                 |
|---------------|----------------------------------------------|---------|-----------|--------|----------|-------------|-------------|-----------------|--------------------------|------------|-------------|-------------|--------------------------------------|
| path:hsa04657 | IL-17 signaling pathway                      | 23      | 124       | 93     | 7246     | 0.185483871 | 0.012834667 | 14.45178633     | 627;4318;4;XCL10;MM      |            | 3.95E-21    | 1.49E-19    | Organismal Systems                   |
| path:hsa04668 | TNF signaling pathway                        | 23      | 124       | 110    | 7246     | 0.185483871 | 0.015180789 | 12.21832845     | 3627;4318;4;CL10;MMF     |            | 2.45E-19    | 6.15E-18    | Environmental Information Processing |
| path:hsa01522 | Endocrine resistance                         | 21      | 124       | 96     | 7246     | 0.169354839 | 0.013248689 | 12.7827621      | 3725;5894;2;JUN;RAF1;    |            | 3.78E-18    | 6.58E-17    | Human Diseases                       |
| path:hsa04151 | PI3K-Akt signaling pathway                   | 32      | 124       | 353    | 7246     | 0.258064516 | 0.048716533 | 5.29726766      | 064;842;59B2;CASP9;(     |            | 1.99E-15    | 2.37E-14    | Environmental Information Processing |
| path:hsa04210 | Apoptosis                                    | 21      | 124       | 135    | 7246     | 0.169354839 | 0.018630969 | 9.089964158     | 5894;4170;1;MCL1;CA      |            | 5.84E-15    | 6.00E-14    | Cellular Processes                   |
| path:hsa04218 | Cellular senescence                          | 21      | 124       | 158    | 7246     | 0.169354839 | 0.021805134 | 7.766741527     | 5970;890;3;2;RELA;CC     |            | 1.48E-13    | 1.24E-12    | Cellular Processes                   |
| path:hsa04926 | Relaxin signaling pathway                    | 19      | 124       | 130    | 7246     | 0.153225806 | 0.017940933 | 8.54057072      | 3725;5894;4;UN;RAF1;A    |            | 4.15E-13    | 2.93E-12    | Organismal Systems                   |
| path:hsa04068 | FoxO signaling pathway                       | 19      | 124       | 132    | 7246     | 0.153225806 | 0.018216947 | 8.411168133     | 586;595;1021;IL10;CCN    |            | 5.51E-13    | 3.78E-12    | Environmental Information Processing |
| path:hsa04066 | HIF-1 signaling pathway                      | 17      | 124       | 100    | 7246     | 0.137096774 | 0.013800718 | 9.934032258     | 1956;3458;R;IFNG;EGF     |            | 6.16E-13    | 3.97E-12    | Environmental Information Processing |
| path:hsa04115 | p53 signaling pathway                        | 15      | 124       | 72     | 7246     | 0.120967742 | 0.009936517 | 12.17405914     | 157;842;102;SP9;CDKN     |            | 6.81E-13    | 4.27E-12    | Cellular Processes                   |
| path:hsa04620 | Toll-like receptor signaling pathway         | 17      | 124       | 102    | 7246     | 0.137096774 | 0.014076732 | 9.739247312     | 725;5599;3;6APK8;CXCI    |            | 8.63E-13    | 5.27E-12    | Organismal Systems                   |
| path:hsa04625 | C-type lectin receptor signaling pathway     | 17      | 124       | 104    | 7246     | 0.137096774 | 0.014352746 | 9.551954094     | 124;3725;5;8NF;JUN;RA    |            | 1.20E-12    | 7.15E-12    | Organismal Systems                   |
| path:hsa04659 | Th17 cell differentiation                    | 17      | 124       | 105    | 7246     | 0.137096774 | 0.014490754 | 9.460983103     | 599;3458;1;PK8;IFNG;     |            | 1.41E-12    | 8.19E-12    | Organismal Systems                   |
| path:hsa04010 | MAPK signaling pathway                       | 26      | 124       | 295    | 7246     | 0.209677419 | 0.040712117 | 5.150246036     | 40;7124;372;GFB1;TNF     |            | 2.61E-12    | 1.47E-11    | Environmental Information Processing |
| path:hsa04660 | T cell receptor signaling pathway            | 16      | 124       | 101    | 7246     | 0.129032258 | 0.013938725 | 9.257106356     | 4;3565;3586;IL1;IL4;IL10 |            | 9.57E-12    | 4.92E-11    | Organismal Systems                   |
| path:hsa04915 | Estrogen signaling pathway                   | 17      | 124       | 124    | 7246     | 0.137096774 | 0.018768976 | 7.304435484     | 318;1956;209;EGFR;ESR1   |            | 1.02E-10    | 4.73E-10    | Organismal Systems                   |
| path:hsa04064 | NF-kappa B signaling pathway                 | 14      | 124       | 93     | 7246     | 0.112903226 | 0.012834667 | 8.796739507     | 3383;3576;2;AM1;CXCI     |            | 4.17E-10    | 1.75E-09    | Environmental Information Processing |
| path:hsa04919 | Thyroid hormone signaling pathway            | 15      | 124       | 116    | 7246     | 0.120967742 | 0.016008832 | 7.55631257      | 609;2932;10;GSK3B;NC     |            | 8.64E-10    | 3.42E-09    | Organismal Systems                   |
| path:hsa04012 | ErbB signaling pathway                       | 13      | 124       | 85     | 7246     | 0.10483871  | 0.01173061  | 8.937191651     | 956;4609;1;MYC;EGF;      |            | 1.49E-09    | 5.82E-09    | Environmental Information Processing |
| path:hsa04917 | Prolactin signaling pathway                  | 11      | 124       | 70     | 7246     | 0.088709677 | 0.009660502 | 9.182718894     | 2932;2099;SSK3B;ESR1     |            | 2.17E-08    | 7.56E-08    | Organismal Systems                   |
| path:hsa04370 | VEGF signaling pathway                       | 10      | 124       | 59     | 7246     | 0.080645161 | 0.008142423 | 9.9043193       | 4;842;5;743;SP9;PTGS2    |            | 4.63E-08    | 1.56E-07    | Environmental Information Processing |
| path:hsa04215 | Apoptosis - multiple species                 | 8       | 124       | 33     | 7246     | 0.064516129 | 0.004554237 | 14.16617791     | 1;5599;842;APK8;CAS      |            | 5.69E-08    | 1.89E-07    | Cellular Processes                   |
| path:hsa04630 | Jak-STAT signaling pathway                   | 15      | 124       | 162    | 7246     | 0.120967742 | 0.022357163 | 5.410692951     | 1950;3458;3;GF;IFNG;JL   |            | 8.83E-08    | 2.85E-07    | Environmental Information Processing |
| path:hsa04722 | Neurotrophin signaling pathway               | 13      | 124       | 119    | 7246     | 0.10483871  | 0.016422854 | 6.383708322     | 5894;5599;2;APK8;GSK     |            | 9.67E-08    | 3.08E-07    | Organismal Systems                   |
| path:hsa04621 | NOD-like receptor signaling pathway          | 15      | 124       | 167    | 7246     | 0.120967742 | 0.023047198 | 5.248696156     | 170;7124;37;LA;TNF;JUL   |            | 1.32E-07    | 4.10E-07    | Organismal Systems                   |
| path:hsa04920 | Adipocytokine signaling pathway              | 10      | 124       | 69     | 7246     | 0.080645161 | 0.009522495 | 8.468910706     | 4;5599;207;K8;AKT1;T     |            | 2.17E-07    | 6.45E-07    | Organismal Systems                   |
| path:hsa04931 | Insulin resistance                           | 12      | 124       | 107    | 7246     | 0.096774194 | 0.014766768 | 6.55351221      | 6;5599;293;PK8;GSK3E     |            | 2.31E-07    | 6.79E-07    | Human Diseases                       |
| path:hsa04662 | B cell receptor signaling pathway            | 10      | 124       | 70     | 7246     | 0.080645161 | 0.009660502 | 8.347926267     | 4;2932;557;K3B;PRKCE     |            | 2.49E-07    | 7.22E-07    | Organismal Systems                   |
| path:hsa04658 | Th1 and Th2 cell differentiation             | 11      | 124       | 90     | 7246     | 0.088709677 | 0.012420646 | 7.142114695     | 599;4792;2;APK8;NFK      |            | 3.13E-07    | 8.84E-07    | Organismal Systems                   |
| path:hsa01523 | Antifolate resistance                        | 7       | 124       | 31     | 7246     | 0.056451613 | 0.004278222 | 13.19510926     | 69;5970;10;2;RELA;ABC    |            | 6.78E-07    | 1.87E-06    | Human Diseases                       |
| path:hsa04110 | Cell cycle                                   | 12      | 124       | 124    | 7246     | 0.096774194 | 0.01711289  | 5.655046826     | 4609;2932;YC;GSK3B;      |            | 1.16E-06    | 3.17E-06    | Cellular Processes                   |
| path:hsa05020 | Prion diseases                               | 7       | 124       | 34     | 7246     | 0.056451613 | 0.004692244 | 12.03083491     | 569;581;206;BAX;ELK      |            | 1.33E-06    | 3.58E-06    | Human Diseases                       |
| path:hsa05330 | Allograft rejection                          | 7       | 124       | 35     | 7246     | 0.056451613 | 0.004830251 | 11.68709677     | 586;3458;35;IL10;IFNG;J  |            | 1.64E-06    | 4.36E-06    | Human Diseases                       |
| path:hsa04014 | Ras signaling pathway                        | 16      | 124       | 232    | 7246     | 0.129032258 | 0.032017665 | 4.03003337      | 3;2002;195;ELK1;EGFR     |            | 1.82E-06    | 4.78E-06    | Environmental Information Processing |
| path:hsa05211 | Renal cell carcinoma                         | 9       | 124       | 69     | 7246     | 0.072580645 | 0.009522495 | 7.622019635     | 026;7040;3;TGFB1;HII     |            | 2.25E-06    | 5.83E-06    | Human Diseases                       |
| path:hsa05332 | Graft-versus-host disease                    | 7       | 124       | 37     | 7246     | 0.056451613 | 0.005106266 | 11.05536181     | 552;3458;35A;IFNG;FA     |            | 2.44E-06    | 6.26E-06    | Human Diseases                       |
| path:hsa04622 | RIG-I-like receptor signaling pathway        | 9       | 124       | 70     | 7246     | 0.072580645 | 0.009660502 | 7.513133641     | 70;5599;362A;MAPK8;C     |            | 2.54E-06    | 6.45E-06    | Organismal Systems                   |
| path:hsa05231 | Choline metabolism in cancer                 | 10      | 124       | 99     | 7246     | 0.080645161 | 0.01366271  | 5.902574128     | 6;1950;557;EGF;PRKCE     |            | 6.44E-06    | 1.62E-05    | Human Diseases                       |
| path:hsa05203 | Viral carcinogenesis                         | 14      | 124       | 200    | 7246     | 0.112903226 | 0.027601435 | 4.090483871     | 5;890;1026;3;CDKN1A;C    |            | 7.11E-06    | 1.77E-05    | Human Diseases                       |
| path:hsa04921 | Oxytocin signaling pathway                   | 12      | 124       | 152    | 7246     | 0.096774194 | 0.020977091 | 4.613327674     | 6;5743;557;2;PRKCB;C     |            | 9.91E-06    | 2.44E-05    | Organismal Systems                   |
| path:hsa05221 | Acute myeloid leukemia                       | 6       | 124       | 66     | 7246     | 0.064516129 | 0.009108474 | 7.083088954     | 4;4353;460;MPO;MYC;C     |            | 1.47E-05    | 3.57E-05    | Human Diseases                       |
| path:hsa04664 | Fc epsilon RI signaling pathway              | 8       | 124       | 67     | 7246     | 0.064516129 | 0.009246481 | 6.977371208     | 4;5894;5599;3;RAF1;MAI   |            | 1.64E-05    | 3.95E-05    | Organismal Systems                   |
| path:hsa04062 | Chemokine signaling pathway                  | 13      | 124       | 187    | 7246     | 0.10483871  | 0.025807342 | 4.062359841     | 347;2932;6;5;SK3B;CX     |            | 1.66E-05    | 3.95E-05    | Organismal Systems                   |
| path:hsa04371 | Apelin signaling pathway                     | 11      | 124       | 137    | 7246     | 0.088709677 | 0.018906983 | 4.691900165     | 595;5054;20;SERPINE1;    |            | 2.02E-05    | 4.76E-05    | Environmental Information Processing |
| path:hsa04912 | GnRH signaling pathway                       | 9       | 124       | 93     | 7246     | 0.072580645 | 0.012834667 | 5.655046826     | 599;2002;19;K8;ELK1;EC   |            | 2.70E-05    | 6.29E-05    | Organismal Systems                   |
| path:hsa04060 | Cytokine-cytokine receptor interaction       | 16      | 124       | 292    | 7246     | 0.129032258 | 0.040298096 | 3.201944322     | 7;3552;3586;IL1A;IL10;C  |            | 3.40E-05    | 7.83E-05    | Environmental Information Processing |
| path:hsa05204 | Chemical carcinogenesis                      | 8       | 124       | 80     | 7246     | 0.064516129 | 0.011040574 | 5.843548387     | 1;1545;5743;YPIB1;PTG    |            | 6.06E-05    | 0.00013845  | Human Diseases                       |
| path:hsa04940 | Type I diabetes mellitus                     | 6       | 124       | 41     | 7246     | 0.048387097 | 0.005658294 | 8.551534225     | 2;3458;356;3;IFNG;FASL   |            | 6.13E-05    | 0.000138457 | Human Diseases                       |
| path:hsa05131 | Shigellosis                                  | 7       | 124       | 65     | 7246     | 0.056451613 | 0.008970466 | 6.293052109     | 770;5599;35;MAPK8;C      |            | 0.000110874 | 0.000248094 | Human Diseases                       |
| path:hsa04672 | Intestinal immune network for IgA production | 6       | 124       | 46     | 7246     | 0.048387097 | 0.0063833   | 7.622019635     | 3586;7040;3;6;IL10;TG    |            | 0.000119015 | 0.000263701 | Organismal Systems                   |
| path:hsa04024 | cAMP signaling pathway                       | 12      | 124       | 199    | 7246     | 0.096774194 | 0.027463428 | 3.523747771     | 3;1813;2353;RD2;FOS;A    |            | 0.000141907 | 0.000311368 | Environmental Information Processing |
| path:hsa04913 | Ovarian steroidogenesis                      | 6       | 124       | 49     | 7246     | 0.048387097 | 0.006762352 | 7.155365372     | 1545;5743;7;PIB1;PTGS    |            | 0.000170394 | 0.000370279 | Organismal Systems                   |
| path:hsa04914 | Progesterone-mediated oocyte maturation      | 8       | 124       | 99     | 7246     | 0.064516129 | 0.01366271  | 4.722059303     | 1;5894;5599A;F1;MAPK     |            | 0.0002732   | 0.000588029 | Organismal Systems                   |
| path:hsa04140 | Autophagy - animal                           | 9       | 124       | 128    | 7246     | 0.072580645 | 0.017664919 | 4.10874496      | 894;5599;2;C1;MAPK8;A    |            | 0.000323889 | 0.000690556 | Cellular Processes                   |



|               |                                                         |    |     |     |      |             |             |             |                        |             |              |                                      |
|---------------|---------------------------------------------------------|----|-----|-----|------|-------------|-------------|-------------|------------------------|-------------|--------------|--------------------------------------|
| path:hsa04928 | Parathyroid hormone synthesis, secretion and action     | 8  | 124 | 106 | 7246 | 0.064516129 | 0.014628761 | 4.410225198 | 6;5579;2353KCB;FOS;C   | 0.00043561  | 0.000911553  | Organismal Systems                   |
| path:hsa00140 | Steroid hormone biosynthesis                            | 6  | 124 | 60  | 7246 | 0.048387097 | 0.008280431 | 5.843548387 | l;1545;1588;PIB1;CYP1  | 0.000523343 | 0.001085096  | Metabolism                           |
| path:hsa04623 | Cytosolic DNA-sensing pathway                           | 6  | 124 | 62  | 7246 | 0.048387097 | 0.008556445 | 5.655046826 | ;3;569;5970;6;RELA;CX  | 0.000624988 | 0.001283972  | Organismal Systems                   |
| path:hsa04670 | Leukocyte transendothelial migration                    | 8  | 124 | 112 | 7246 | 0.064516129 | 0.015456804 | 4.173963134 | l;4318;51754AMP9;PECA  | 0.000630623 | 0.001283972  | Organismal Systems                   |
| path:hsa04726 | Serotonergic synapse                                    | 8  | 124 | 113 | 7246 | 0.064516129 | 0.015594811 | 4.137025407 | l;5742;5743;TGS1;PTGS  | 0.000669089 | 0.001350125  | Organismal Systems                   |
| path:hsa04540 | Gap junction                                            | 7  | 124 | 88  | 7246 | 0.056451613 | 0.012144632 | 4.648277126 | 356;1950;18R;EGF;DRD   | 0.000730767 | 0.001461534  | Cellular Processes                   |
| path:hsa04015 | Rap1 signaling pathway                                  | 11 | 124 | 206 | 7246 | 0.088709677 | 0.028429478 | 3.120341372 | 956;1950;1R;EGF;DRD    | 0.000763346 | 0.001513299  | Environmental Information Processing |
| path:hsa04137 | Mitophagy - animal                                      | 6  | 124 | 65  | 7246 | 0.048387097 | 0.008970466 | 5.394044665 | ;5970;3725;RELA;JUN;   | 0.000805442 | 0.001582868  | Cellular Processes                   |
| path:hsa05310 | Asthma                                                  | 4  | 124 | 28  | 7246 | 0.032258065 | 0.003864201 | 8.347926267 | ;7124;3586;LG;TNF;IL1  | 0.001217053 | 0.002371155  | Human Diseases                       |
| path:hsa00980 | Metabolism of xenobiotics by cytochrome P450            | 6  | 124 | 72  | 7246 | 0.048387097 | 0.009936517 | 4.869623656 | l;1545;1544;PIB1;CYP1  | 0.00138238  | 0.002670238  | Metabolism                           |
| path:hsa04650 | Natural killer cell mediated cytotoxicity               | 8  | 124 | 127 | 7246 | 0.064516129 | 0.017526911 | 3.680975362 | l;3;3458;5579G;PRKCB;  | 0.001436461 | 0.002751187  | Organismal Systems                   |
| path:hsa05320 | Autoimmune thyroid disease                              | 5  | 124 | 50  | 7246 | 0.040322581 | 0.006900359 | 5.843548387 | 386;356;355;IL10;FASL  | 0.001549262 | 0.002942296  | Human Diseases                       |
| path:hsa04217 | Necroptosis                                             | 9  | 124 | 162 | 7246 | 0.072580645 | 0.022357163 | 3.246415771 | 599;3552;34PK8;IL1A;II | 0.001764533 | 0.003323204  | Cellular Processes                   |
| path:hsa00232 | Caffeine metabolism                                     | 2  | 124 | 5   | 7246 | 0.016129032 | 0.000690036 | 23.37419355 | 1544;7498 ;YPIA2;XD    | 0.002808655 | 0.005245918  | Metabolism                           |
| path:hsa04725 | Cholinergic synapse                                     | 7  | 124 | 112 | 7246 | 0.056451613 | 0.015456804 | 3.652217742 | 2353;207;590S;AKT1;B   | 0.00297603  | 0.005512974  | Organismal Systems                   |
| path:hsa04211 | Longevity regulating pathway                            | 6  | 124 | 89  | 7246 | 0.048387097 | 0.012282639 | 3.939470823 | ;5970;6648ELA;SOD2;    | 0.004063158 | 0.007465639  | Organismal Systems                   |
| path:hsa04150 | mTOR signaling pathway                                  | 8  | 124 | 151 | 7246 | 0.064516129 | 0.020839084 | 3.095919675 | 4;5894;2932F1;GSK3B;   | 0.004234255 | 0.007717272  | Environmental Information Processing |
| path:hsa00590 | Arachidonic acid metabolism                             | 5  | 124 | 63  | 7246 | 0.040322581 | 0.008694452 | 4.637736815 | 44;5742;574C3;PTGS1;   | 0.004308491 | 0.007789752  | Metabolism                           |
| path:hsa04934 | Cushing syndrome                                        | 8  | 124 | 154 | 7246 | 0.064516129 | 0.021253105 | 3.035609552 | l;595;1029;3D1;CDKN2   | 0.00476786  | 0.008551875  | Human Diseases                       |
| path:hsa04611 | Platelet activation                                     | 7  | 124 | 123 | 7246 | 0.056451613 | 0.016974883 | 3.325596643 | 846;5742;20S3;PTGS1;   | 0.005001203 | 0.008899778  | Organismal Systems                   |
| path:hsa00220 | Arginine biosynthesis                                   | 3  | 124 | 21  | 7246 | 0.024193548 | 0.002898151 | 8.347926267 | 346;4843;48S3;NOS2;N   | 0.005193879 | 0.009170442  | Metabolism                           |
| path:hsa05010 | Alzheimer disease                                       | 8  | 124 | 164 | 7246 | 0.064516129 | 0.022633177 | 2.850511408 | 4;842;4842;SP9;NOS1;C  | 0.006926634 | 0.012135033  | Human Diseases                       |
| path:hsa04728 | Dopaminergic synapse                                    | 7  | 124 | 131 | 7246 | 0.056451613 | 0.01807894  | 3.122506772 | 813;2932;58RD2;GSK3I   | 0.007026516 | 0.012215328  | Organismal Systems                   |
| path:hsa04930 | Type II diabetes mellitus                               | 4  | 124 | 46  | 7246 | 0.032258065 | 0.00634833  | 5.081346424 | ;7124;5599;TNF;MAPK    | 0.007657262 | 0.013210238  | Human Diseases                       |
| path:hsa04910 | Insulin signaling pathway                               | 7  | 124 | 137 | 7246 | 0.056451613 | 0.018906983 | 2.98575465  | 599;2002;29K8;ELK1;G   | 0.008905336 | 0.015247014  | Organismal Systems                   |
| path:hsa00983 | Drug metabolism - other enzymes                         | 5  | 124 | 77  | 7246 | 0.040322581 | 0.010626553 | 3.794511194 | 350;4353;74TP1;MPO;X   | 0.010025276 | 0.017035431  | Metabolism                           |
| path:hsa04610 | Complement and coagulation cascades                     | 5  | 124 | 79  | 7246 | 0.040322581 | 0.010902567 | 3.698448346 | 147;5054;21;SERPINE1   | 0.011132006 | 0.018774875  | Organismal Systems                   |
| path:hsa04072 | Phospholipase D signaling pathway                       | 7  | 124 | 145 | 7246 | 0.056451613 | 0.020011041 | 2.821023359 | 576;1950;2C8;EGF;AK1   | 0.011954515 | 0.0200112744 | Environmental Information Processing |
| path:hsa04310 | Wnt signaling pathway                                   | 7  | 124 | 146 | 7246 | 0.056451613 | 0.020149048 | 2.801701281 | 599;4609;25;MYC;GSK    | 0.012382865 | 0.020577407  | Environmental Information Processing |
| path:hsa04020 | Calcium signaling pathway                               | 8  | 124 | 182 | 7246 | 0.064516129 | 0.025117306 | 2.568592698 | l;5733;2064;TGER3;ERI  | 0.012580662 | 0.020753501  | Environmental Information Processing |
| path:hsa04923 | Regulation of lipolysis in adipocytes                   | 4  | 124 | 54  | 7246 | 0.032258065 | 0.007452388 | 4.328554361 | 2;5733;5743TGER3;PTC   | 0.013369021 | 0.021894194  | Organismal Systems                   |
| path:hsa04350 | TGF-beta signaling pathway                              | 5  | 124 | 84  | 7246 | 0.040322581 | 0.011592603 | 3.478302611 | 340;3458;55B1;IFNG;M   | 0.014257655 | 0.02318151   | Environmental Information Processing |
| path:hsa05016 | Huntington disease                                      | 8  | 124 | 187 | 7246 | 0.064516129 | 0.025807342 | 2.499913748 | l;7581;842;6AX;CASP9;  | 0.014626948 | 0.023612073  | Human Diseases                       |
| path:hsa04730 | Long-term depression                                    | 4  | 124 | 60  | 7246 | 0.032258065 | 0.008280431 | 3.895698925 | ;5579;4842;KCB2;NOS1   | 0.019067828 | 0.030562617  | Organismal Systems                   |
| path:hsa04640 | Hematopoietic cell lineage                              | 5  | 124 | 94  | 7246 | 0.040322581 | 0.012972675 | 3.108270419 | 369;3552;35IL6;IL1A;IL | 0.02217148  | 0.035287003  | Organismal Systems                   |
| path:hsa05217 | Basal cell carcinoma                                    | 4  | 124 | 63  | 7246 | 0.032258065 | 0.008694452 | 3.710189452 | 7;2932;1026K3B;CDKN    | 0.022403785 | 0.03540738   | Human Diseases                       |
| path:hsa04960 | Aldosterone-regulated sodium reabsorption               | 3  | 124 | 37  | 7246 | 0.024193548 | 0.005106266 | 4.738012206 | 306;5579;552;PRKCB;M   | 0.02489908  | 0.039077723  | Organismal Systems                   |
| path:hsa04750 | Inflammatory mediator regulation of TRP channels        | 5  | 124 | 99  | 7246 | 0.040322581 | 0.01366271  | 2.951287064 | 132;7442;554;TRPV1;M   | 0.027023216 | 0.042118944  | Organismal Systems                   |
| path:hsa00982 | Drug metabolism - cytochrome P450                       | 4  | 124 | 68  | 7246 | 0.032258065 | 0.009384488 | 3.437381404 | ;2950;1576;STP1;CYP3   | 0.028712421 | 0.044445255  | Metabolism                           |
| path:hsa00380 | Tryptophan metabolism                                   | 3  | 124 | 40  | 7246 | 0.024193548 | 0.005520287 | 4.38266129  | 345;1544;151;CYP1A2;C  | 0.030517254 | 0.046917683  | Metabolism                           |
| path:hsa04550 | signaling pathways regulating pluripotency of stem cell | 6  | 124 | 139 | 7246 | 0.048387097 | 0.019182998 | 2.522394987 | 4;4609;2932MYC;GSK3    | 0.031624376 | 0.048291276  | Cellular Processes                   |
| path:hsa04976 | Bile secretion                                          | 4  | 124 | 71  | 7246 | 0.032258065 | 0.00979851  | 3.292139936 | 7;9429;1576BCG2;CYP;   | 0.032956089 | 0.049987089  | Organismal Systems                   |
| path:hsa04520 | Adherens junction                                       | 4  | 124 | 72  | 7246 | 0.032258065 | 0.009936517 | 3.246415771 | ;2064;4233;RBB2;MET    | 0.034447959 | 0.051771358  | Cellular Processes                   |
| path:hsa04514 | Cell adhesion molecules (CAMs)                          | 6  | 124 | 142 | 7246 | 0.048387097 | 0.019597019 | 2.469104952 | ;1364;6401;L;LDN4;SEL  | 0.034590597 | 0.051771358  | Environmental Information Processing |
| path:hsa03320 | PPAR signaling pathway                                  | 4  | 124 | 74  | 7246 | 0.032258065 | 0.010212531 | 3.158674804 | ;4312;5465;AMP1;PPAF   | 0.037548243 | 0.055828308  | Organismal Systems                   |
| path:hsa04340 | Hedgehog signaling pathway                              | 3  | 124 | 47  | 7246 | 0.024193548 | 0.006486337 | 3.729924502 | 396;2932;592;GSK3B;C   | 0.045982828 | 0.067922348  | Environmental Information Processing |
| path:hsa04390 | Hippo signaling pathway                                 | 6  | 124 | 154 | 7246 | 0.048387097 | 0.021253105 | 2.276707164 | l;2932;595;53B;CCND1;  | 0.048229738 | 0.070778707  | Environmental Information Processing |
| path:hsa00330 | Arginine and proline metabolism                         | 3  | 124 | 49  | 7246 | 0.024193548 | 0.006762352 | 3.577682686 | 346;4843;48S3;NOS2;N   | 0.050992015 | 0.073873047  | Metabolism                           |
| path:hsa05030 | Cocaine addiction                                       | 3  | 124 | 49  | 7246 | 0.024193548 | 0.006762352 | 3.577682686 | 370;3725;18LA;JUN;DR   | 0.050992015 | 0.073873047  | Human Diseases                       |
| path:hsa04146 | Peroxisome                                              | 4  | 124 | 83  | 7246 | 0.032258065 | 0.011454596 | 2.816167897 | ;4843;7498;NOS2;XDH    | 0.053427626 | 0.076908558  | Cellular Processes                   |
| path:hsa04152 | AMPK signaling pathway                                  | 5  | 124 | 120 | 7246 | 0.040322581 | 0.016560861 | 2.434811828 | 890;595;207A2;CCND1;   | 0.054481933 | 0.077929853  | Environmental Information Processing |
| path:hsa04666 | Fc gamma R-mediated phagocytosis                        | 4  | 124 | 90  | 7246 | 0.032258065 | 0.012420646 | 2.597132616 | 4;5579;207;KCB;AKT1    | 0.067940525 | 0.096569551  | Organismal Systems                   |
| path:hsa04530 | Tight junction                                          | 6  | 124 | 170 | 7246 | 0.048387097 | 0.02346122  | 2.062428843 | 9;2064;136RBB2;CLDN    | 0.07098474  | 0.100265945  | Cellular Processes                   |
| path:hsa00790 | Folate biosynthesis                                     | 2  | 124 | 26  | 7246 | 0.016129032 | 0.003588187 | 4.495037221 | 231;8644 R1B1;AKR      | 0.072312615 | 0.101507149  | Metabolism                           |
| path:hsa04713 | Circadian entrainment                                   | 4  | 124 | 96  | 7246 | 0.032258065 | 0.013248689 | 2.434811828 | 4842;2353;NOS1;FOS;    | 0.081842754 | 0.114175694  | Organismal Systems                   |
| path:hsa00591 | Linoleic acid metabolism                                | 2  | 124 | 29  | 7246 | 0.016129032 | 0.004002208 | 4.03003337  | 1544;1576 P1A2;CYP3    | 0.08742772  | 0.121218802  | Metabolism                           |

|               |                                                           |   |     |     |      |             |             |             |                        |             |             |                                      |
|---------------|-----------------------------------------------------------|---|-----|-----|------|-------------|-------------|-------------|------------------------|-------------|-------------|--------------------------------------|
| path:hsa04723 | Retrograde endocannabinoid signaling                      | 5 | 124 | 141 | 7246 | 0.040322581 | 0.019459012 | 2.072180279 | 599;5743;55K8;PTGS2;I  | 0.093767771 | 0.128433432 | Organismal Systems                   |
| path:hsa04916 | Melanogenesis                                             | 4 | 124 | 101 | 7246 | 0.032258065 | 0.013938725 | 2.314276589 | ;2932;5579;K3B;PRKC    | 0.094418907 | 0.128546223 | Organismal Systems                   |
| path:hsa04261 | Adrenergic signaling in cardiomyocytes                    | 5 | 124 | 144 | 7246 | 0.040322581 | 0.019873033 | 2.029009857 | 207;596;529F1;BCL2;PII | 0.100322992 | 0.135766444 | Organismal Systems                   |
| path:hsa00830 | Retinol metabolism                                        | 3 | 124 | 67  | 7246 | 0.024193548 | 0.009246481 | 2.616514203 | 544;1576;152;CYP3A4;C  | 0.106739814 | 0.142740817 | Metabolism                           |
| path:hsa04720 | Long-term potentiation                                    | 3 | 124 | 67  | 7246 | 0.024193548 | 0.009246481 | 2.616514203 | 594;5579;55;PRKCB;M    | 0.106739814 | 0.142740817 | Organismal Systems                   |
| path:hsa05031 | Amphetamine addiction                                     | 3 | 124 | 68  | 7246 | 0.024193548 | 0.009384488 | 2.578036053 | 725;5579;23N;PRKCB;F   | 0.110341078 | 0.146688728 | Human Diseases                       |
| path:hsa04022 | cGMP-PKG signaling pathway                                | 5 | 124 | 163 | 7246 | 0.040322581 | 0.02249517  | 1.792499505 | 894;207;525;AKT1;PIK   | 0.146865297 | 0.194102673 | Environmental Information Processing |
| path:hsa04216 | Ferroptosis                                               | 2 | 124 | 40  | 7246 | 0.016129032 | 0.005520287 | 2.921774194 | 3162;7157 IMOX1;TP5    | 0.149163565 | 0.195993987 | Cellular Processes                   |
| path:hsa04114 | Oocyte meiosis                                            | 4 | 124 | 124 | 7246 | 0.032258065 | 0.01711289  | 1.885015609 | ;5241;891;5R;CCNB1;N   | 0.162589742 | 0.212400472 | Cellular Processes                   |
| path:hsa04973 | Carbohydrate digestion and absorption                     | 2 | 124 | 44  | 7246 | 0.016129032 | 0.006072316 | 2.656158358 | 5579;207 RKC           | 0.173350542 | 0.223869842 | Organismal Systems                   |
| path:hsa02010 | ABC transporters                                          | 2 | 124 | 44  | 7246 | 0.016129032 | 0.006072316 | 2.656158358 | 10257;9429BCC4;ABC     | 0.173350542 | 0.223869842 | Environmental Information Processing |
| path:hsa05410 | Hypertrophic cardiomyopathy (HCM)                         | 3 | 124 | 85  | 7246 | 0.024193548 | 0.01173061  | 2.062428843 | 569;7040;716;TGFB1;T   | 0.177840473 | 0.228363335 | Human Diseases                       |
| path:hsa05322 | Systemic lupus erythematosus                              | 4 | 124 | 130 | 7246 | 0.032258065 | 0.017940933 | 1.798014888 | ;7124;3586;G;TNF;IL1   | 0.182742489 | 0.233332218 | Human Diseases                       |
| path:hsa04961 | Endocrine and other factor-regulated calcium reabsorption | 2 | 124 | 47  | 7246 | 0.016129032 | 0.006486337 | 2.486616335 | 2099;5579;SR1;PRKC     | 0.191882255 | 0.243625784 | Organismal Systems                   |
| path:hsa05150 | Staphylococcus aureus infection                           | 2 | 124 | 52  | 7246 | 0.016129032 | 0.007176373 | 2.24751861  | 3586;3383 IL10;ICAM1   | 0.223283342 | 0.281910811 | Human Diseases                       |
| path:hsa00480 | Glutathione metabolism                                    | 2 | 124 | 53  | 7246 | 0.016129032 | 0.00731438  | 2.205112599 | 2950;2944 STP1;GST     | 0.229617337 | 0.288297323 | Metabolism                           |
| path:hsa04080 | Neuroactive ligand-receptor interaction                   | 7 | 124 | 305 | 7246 | 0.056451613 | 0.042092189 | 1.341142253 | 733;1813;21 GER3;DRD   | 0.266847967 | 0.333191384 | Environmental Information Processing |
| path:hsa04810 | Regulation of actin cytoskeleton                          | 5 | 124 | 213 | 7246 | 0.040322581 | 0.029395529 | 1.371724973 | 556;1950;21 GFR;EGF    | 0.300502062 | 0.373150912 | Cellular Processes                   |
| path:hsa04141 | Protein processing in endoplasmic reticulum               | 4 | 124 | 164 | 7246 | 0.032258065 | 0.022633177 | 1.425255704 | ;5599;4780;APK8;NFE    | 0.308578863 | 0.381086464 | Genetic Information Processing       |
| path:hsa03430 | Mismatch repair                                           | 1 | 124 | 23  | 7246 | 0.008064516 | 0.003174165 | 2.540673212 | 5111 PCNA              | 0.32807756  | 0.402964829 | Genetic Information Processing       |
| path:hsa04612 | Antigen processing and presentation                       | 2 | 124 | 69  | 7246 | 0.016129032 | 0.009522495 | 1.693782141 | 7124;3458 TNF;IFNG     | 0.331263879 | 0.404679117 | Organismal Systems                   |
| path:hsa04360 | Axon guidance                                             | 4 | 124 | 175 | 7246 | 0.032258065 | 0.024151256 | 1.335668203 | ;2932;4233;SK3B;MET    | 0.351504398 | 0.427096741 | Organismal Systems                   |
| path:hsa00562 | Inositol phosphate metabolism                             | 2 | 124 | 74  | 7246 | 0.016129032 | 0.010212531 | 1.579337402 | 5294;5728 IK3CG;PTE    | 0.362487692 | 0.438086729 | Metabolism                           |
| path:hsa05012 | Parkinson disease                                         | 3 | 124 | 129 | 7246 | 0.024193548 | 0.017802926 | 1.358964741 | 1813;842;832;CASP9;C   | 0.380247645 | 0.457106212 | Human Diseases                       |
| path:hsa04270 | Vascular smooth muscle contraction                        | 3 | 124 | 131 | 7246 | 0.024193548 | 0.01807894  | 1.338217188 | 594;5579;55;PRKCB;M    | 0.389570925 | 0.465836132 | Organismal Systems                   |
| path:hsa04512 | ECM-receptor interaction                                  | 2 | 124 | 82  | 7246 | 0.016129032 | 0.011316588 | 1.425255704 | 6696;1277 PPI;COL1A    | 0.411254319 | 0.48917619  | Environmental Information Processing |
| path:hsa00052 | Galactose metabolism                                      | 1 | 124 | 31  | 7246 | 0.008064516 | 0.004278222 | 1.885015609 | 231 AKR1B1             | 0.415039948 | 0.491094388 | Metabolism                           |
| path:hsa03410 | Base excision repair                                      | 1 | 124 | 33  | 7246 | 0.008064516 | 0.004554237 | 1.770772239 | 5111 PCNA              | 0.434975271 | 0.509349281 | Genetic Information Processing       |
| path:hsa00051 | Fructose and mannose metabolism                           | 1 | 124 | 33  | 7246 | 0.008064516 | 0.004554237 | 1.770772239 | 231 AKR1B1             | 0.434975271 | 0.509349281 | Metabolism                           |
| path:hsa00040 | Pentose and glucuronate interconversions                  | 1 | 124 | 34  | 7246 | 0.008064516 | 0.004692244 | 1.718690702 | 231 AKR1B1             | 0.444688714 | 0.51803943  | Metabolism                           |
| path:hsa05414 | Dilated cardiomyopathy (DCM)                              | 2 | 124 | 89  | 7246 | 0.016129032 | 0.012282639 | 1.313156941 | 7040;7124 TGFB1;TNF    | 0.452405132 | 0.524168393 | Human Diseases                       |
| path:hsa04974 | Protein digestion and absorption                          | 2 | 124 | 90  | 7246 | 0.016129032 | 0.012420646 | 1.298566308 | 1803;1277 PPA;COL1A    | 0.458152738 | 0.524168393 | Organismal Systems                   |
| path:hsa04970 | Salivary secretion                                        | 2 | 124 | 90  | 7246 | 0.016129032 | 0.012420646 | 1.298566308 | 5579;4842 RKC          | 0.458152738 | 0.524168393 | Organismal Systems                   |
| path:hsa05340 | Primary immunodeficiency                                  | 1 | 124 | 36  | 7246 | 0.008064516 | 0.004968258 | 1.623207885 | 959 CD40LG             | 0.463621418 | 0.524168393 | Human Diseases                       |
| path:hsa03030 | DNA replication                                           | 1 | 124 | 36  | 7246 | 0.008064516 | 0.004968258 | 1.623207885 | 5111 PCNA              | 0.463621418 | 0.524168393 | Genetic Information Processing       |
| path:hsa05032 | Morphine addiction                                        | 2 | 124 | 91  | 7246 | 0.016129032 | 0.012558653 | 1.284296349 | 4988;5579 PRM1;PRKC    | 0.463865834 | 0.524168393 | Human Diseases                       |
| path:hsa05033 | Nicotine addiction                                        | 1 | 124 | 40  | 7246 | 0.008064516 | 0.005520287 | 1.460887097 | 1139 CHRNA7            | 0.499586941 | 0.56172462  | Human Diseases                       |
| path:hsa04070 | Phosphatidylinositol signaling system                     | 2 | 124 | 99  | 7246 | 0.016129032 | 0.01366271  | 1.180514826 | 5579;5728 RKC          | 0.508272835 | 0.568661687 | Environmental Information Processing |
| path:hsa00860 | Porphyrin and chlorophyll metabolism                      | 1 | 124 | 42  | 7246 | 0.008064516 | 0.005796301 | 1.391321045 | 3162 HMOX1             | 0.516662036 | 0.575200099 | Metabolism                           |
| path:hsa04922 | Glucagon signaling pathway                                | 2 | 124 | 103 | 7246 | 0.016129032 | 0.014214739 | 1.13466959  | 5465;207 PARA;AKT      | 0.5295721   | 0.586682816 | Organismal Systems                   |
| path:hsa03050 | Proteasome                                                | 1 | 124 | 45  | 7246 | 0.008064516 | 0.006210323 | 1.298566308 | 3458 IFNG              | 0.54119684  | 0.596636516 | Genetic Information Processing       |
| path:hsa03420 | Nucleotide excision repair                                | 1 | 124 | 46  | 7246 | 0.008064516 | 0.00634833  | 1.270336606 | 5111 PCNA              | 0.549097352 | 0.602407775 | Genetic Information Processing       |
| path:hsa04979 | Cholesterol metabolism                                    | 1 | 124 | 50  | 7246 | 0.008064516 | 0.006900359 | 1.168709677 | 1071 CETP              | 0.579372413 | 0.632551524 | Organismal Systems                   |
| path:hsa04724 | Glutamatergic synapse                                     | 2 | 124 | 114 | 7246 | 0.016129032 | 0.015732818 | 1.025183928 | 5579;5594 RKC          | 0.58488014  | 0.634336131 | Organismal Systems                   |
| path:hsa04978 | Mineral absorption                                        | 1 | 124 | 51  | 7246 | 0.008064516 | 0.007038366 | 1.145793801 | 3162 HMOX1             | 0.586620582 | 0.634336131 | Organismal Systems                   |
| path:hsa05034 | Alcoholism                                                | 3 | 124 | 180 | 7246 | 0.024193548 | 0.024841292 | 0.973924731 | 313;5894;552;RAF1;M    | 0.595366666 | 0.64521565  | Human Diseases                       |
| path:hsa00561 | Glycerolipid metabolism                                   | 1 | 124 | 61  | 7246 | 0.008064516 | 0.008418438 | 0.957958752 | 231 AKR1B1             | 0.652622597 | 0.699017568 | Metabolism                           |
| path:hsa05412 | Arrhythmogenic right ventricular cardiomyopathy (ARVC)    | 1 | 124 | 72  | 7246 | 0.008064516 | 0.009936517 | 0.811603943 | 2697 GJA1              | 0.713201448 | 0.760299657 | Human Diseases                       |
| path:hsa05100 | Bacterial invasion of epithelial cells                    | 1 | 124 | 74  | 7246 | 0.008064516 | 0.010212531 | 0.789668701 | 4233 MET               | 0.723030862 | 0.761514856 | Human Diseases                       |
| path:hsa04918 | Thyroid hormone synthesis                                 | 1 | 124 | 74  | 7246 | 0.008064516 | 0.010212531 | 0.789668701 | 5579 PRKCB             | 0.723030862 | 0.761514856 | Organismal Systems                   |
| path:hsa04145 | Phagosome                                                 | 2 | 124 | 148 | 7246 | 0.016129032 | 0.020425062 | 0.789668701 | 4353;4842 MPO;NOS1     | 0.725167022 | 0.761514856 | Cellular Processes                   |
| path:hsa04971 | Gastric acid secretion                                    | 1 | 124 | 75  | 7246 | 0.008064516 | 0.010350538 | 0.779139785 | 5579 PRKCB             | 0.727819509 | 0.761514856 | Organismal Systems                   |
| path:hsa03008 | Ribosome biogenesis in eukaryotes                         | 1 | 124 | 81  | 7246 | 0.008064516 | 0.011178581 | 0.721425727 | 3692 EIF6              | 0.754874612 | 0.786182776 | Genetic Information Processing       |
| path:hsa04911 | Insulin secretion                                         | 1 | 124 | 85  | 7246 | 0.008064516 | 0.01173061  | 0.687476281 | 5579 PRKCB             | 0.771411443 | 0.79972012  | Organismal Systems                   |
| path:hsa04727 | GABAergic synapse                                         | 1 | 124 | 88  | 7246 | 0.008064516 | 0.012144632 | 0.664039589 | 5579 PRKCB             | 0.783083339 | 0.8081134   | Organismal Systems                   |
| path:hsa04925 | Aldosterone synthesis and secretion                       | 1 | 124 | 96  | 7246 | 0.008064516 | 0.013248689 | 0.608702957 | 5579 PRKCB             | 0.811397128 | 0.833526141 | Organismal Systems                   |

|               |                                |   |     |     |      |             |             |             |           |           |             |             |                                |
|---------------|--------------------------------|---|-----|-----|------|-------------|-------------|-------------|-----------|-----------|-------------|-------------|--------------------------------|
| path:hsa04142 | Lysosome                       | 1 | 124 | 123 | 7246 | 0.008064516 | 0.016974883 | 0.475085235 | 1509      | CTSD      | 0.882502699 | 0.898403649 | Cellular Processes             |
| path:hsa04714 | Thermogenesis                  | 2 | 124 | 216 | 7246 | 0.016129032 | 0.02980955  | 0.541069295 | 5468;1432 | ARG;MAPK  | 0.889265227 | 0.901228436 | Organismal Systems             |
| path:hsa04120 | Ubiquitin mediated proteolysis | 1 | 124 | 136 | 7246 | 0.008064516 | 0.018768976 | 0.429672676 | 4193      | MDM2      | 0.906503969 | 0.914597755 | Genetic Information Processing |
| path:hsa04144 | Endocytosis                    | 2 | 124 | 244 | 7246 | 0.016129032 | 0.033673751 | 0.478979376 | 4193;1956 | MDM2;EGF1 | 0.925613818 | 0.929727657 | Cellular Processes             |
| path:hsa00230 | Purine metabolism              | 1 | 124 | 174 | 7246 | 0.008064516 | 0.024013249 | 0.335836114 | 7498      | XDH       | 0.952173398 | 0.952173398 | Metabolism                     |

Supplement table 6. GO Analysis

| Term ID    | Term description                                        | ListHit | ListTotal | PopHit | PopTotal | GeneRatio | BgRatio     | enrichment scor | GeneIds             | GeneSymbo | p-value     | FDR bh      | Category           |
|------------|---------------------------------------------------------|---------|-----------|--------|----------|-----------|-------------|-----------------|---------------------|-----------|-------------|-------------|--------------------|
| GO:0045944 | regulation of transcription from RNA polymerase II p    | 9       | 25        | 588    | 13332    | 0.36      | 0.04410441  | 8.16244898      | 6;1813;104;DRD2;N   |           | 6.44E-07    | 0.000232314 | biological_process |
| GO:0035924 | lar response to vascular endothelial growth factor stim | 3       | 25        | 13     | 13332    | 0.12      | 0.000975098 | 123.0646154     | 32;7422;37.14;VEGF/ |           | 1.65E-06    | 0.000251687 | biological_process |
| GO:0043536 | itive regulation of blood vessel endothelial cell migra | 3       | 25        | 14     | 13332    | 0.12      | 0.001050105 | 114.2742857     | 91;7422;47;VEGFA;N  |           | 2.09E-06    | 0.000251687 | biological_process |
| GO:0045766 | positive regulation of angiogenesis                     | 4       | 25        | 59     | 13332    | 0.16      | 0.004425443 | 36.15457627     | ;1139;4780NA7;NFE2  |           | 4.08E-06    | 0.000368434 | biological_process |
| GO:0032526 | response to retinoic acid                               | 3       | 25        | 20     | 13332    | 0.12      | 0.00150015  | 79.992          | 68;2697;95G;GJA1;P  |           | 6.50E-06    | 0.00046945  | biological_process |
| GO:0042752 | regulation of circadian rhythm                          | 3       | 25        | 29     | 13332    | 0.12      | 0.002175218 | 55.16689655     | 68;7153;55;TOP2A;M  |           | 2.06E-05    | 0.001240032 | biological_process |
| GO:0032922 | circadian regulation of gene expression                 | 3       | 25        | 33     | 13332    | 0.12      | 0.002475248 | 48.48           | 6;1813;104;DRD2;NC  |           | 3.06E-05    | 0.001310261 | biological_process |
| GO:0003158 | endothelium development                                 | 2       | 25        | 5      | 13332    | 0.08      | 0.000375038 | 213.312         | 3791;2697KDR;GJA1   |           | 3.36E-05    | 0.001310261 | biological_process |
| GO:0009416 | response to light stimulus                              | 2       | 25        | 5      | 13332    | 0.08      | 0.000375038 | 213.312         | 1813;2002RD2;ELK    |           | 3.36E-05    | 0.001310261 | biological_process |
| GO:0048010 | ular endothelial growth factor receptor signaling pat   | 3       | 25        | 35     | 13332    | 0.12      | 0.002625263 | 45.70971429     | 32;7422;37.14;VEGF/ |           | 3.66E-05    | 0.001310261 | biological_process |
| GO:0048511 | rhythmic process                                        | 3       | 25        | 36     | 13332    | 0.12      | 0.00270027  | 44.44           | 68;7153;55;TOP2A;M  |           | 3.99E-05    | 0.001310261 | biological_process |
| GO:0006265 | DNA topological change                                  | 2       | 25        | 6      | 13332    | 0.08      | 0.000450045 | 177.76          | 7155;7153P2B;TOP    |           | 5.04E-05    | 0.001399746 | biological_process |
| GO:0051247 | positive regulation of protein metabolic process        | 2       | 25        | 6      | 13332    | 0.08      | 0.000450045 | 177.76          | 1139;5599NA7;MA     |           | 5.04E-05    | 0.001399746 | biological_process |
| GO:0000712 | resolution of meiotic recombination intermediates       | 2       | 25        | 10     | 13332    | 0.08      | 0.000750075 | 106.656         | 7155;7153P2B;TOP    |           | 0.000150525 | 0.003440277 | biological_process |
| GO:0002042 | cell migration involved in sprouting angiogenesis       | 2       | 25        | 10     | 13332    | 0.08      | 0.000750075 | 106.656         | 3791;7422DR;VEGF    |           | 0.000150525 | 0.003440277 | biological_process |
| GO:0043066 | negative regulation of apoptotic process                | 5       | 25        | 284    | 13332    | 0.2       | 0.02130213  | 9.388732394     | 31;5599;33;MAPK8;I  |           | 0.000158564 | 0.003440277 | biological_process |
| GO:0001525 | angiogenesis                                            | 4       | 25        | 150    | 13332    | 0.16      | 0.011251125 | 14.2208         | ;3791;5294DR;PIK3C  |           | 0.000162008 | 0.003440277 | biological_process |
| GO:0003682 | chromatin binding                                       | 5       | 25        | 266    | 12391    | 0.2       | 0.021467194 | 9.316541353     | ;2;7153;10;TOP2A;N  |           | 0.000164035 | 0.017475883 | molecular_function |
| GO:2000352 | egative regulation of endothelial cell apoptotic proce  | 2       | 25        | 11     | 13332    | 0.08      | 0.000825083 | 96.96           | 3791;4780DR;NFE2I   |           | 0.000183763 | 0.003529243 | biological_process |
| GO:0001666 | response to hypoxia                                     | 3       | 25        | 60     | 13332    | 0.12      | 0.00450045  | 26.664          | 13;1139;74CHRNA7;V  |           | 0.00018575  | 0.003529243 | biological_process |
| GO:0042629 | mast cell granule                                       | 2       | 25        | 13     | 14857    | 0.08      | 0.000875008 | 91.42769231     | 231;5294R1B1;PIK    |           | 0.000209643 | 0.017190758 | cellular_component |
| GO:0032496 | response to lipopolysaccharide                          | 3       | 25        | 67     | 13332    | 0.12      | 0.005025503 | 23.87820896     | 97;6590;95I;SLPI;PT |           | 0.000257791 | 0.004227722 | biological_process |
| GO:2000379 | ve regulation of reactive oxygen species metabolic pr   | 2       | 25        | 13     | 13332    | 0.08      | 0.000975098 | 82.04307692     | 1432;4780PK14;NFE   |           | 0.000260011 | 0.004227722 | biological_process |
| GO:1900273 | positive regulation of long-term synaptic potentiation  | 2       | 25        | 13     | 13332    | 0.08      | 0.000975098 | 82.04307692     | 1813;1139;D2;CHRN   |           | 0.000260011 | 0.004227722 | biological_process |
| GO:0010468 | regulation of gene expression                           | 3       | 25        | 68     | 13332    | 0.12      | 0.00510051  | 23.52705882     | ;6;1432;55MAPK14;N  |           | 0.000269356 | 0.004227722 | biological_process |
| GO:0001934 | positive regulation of protein phosphorylation          | 3       | 25        | 70     | 13332    | 0.12      | 0.005250525 | 22.85485714     | 91;1139;74CHRNA7;V  |           | 0.000293482 | 0.004414456 | biological_process |
| GO:0001764 | neuron migration                                        | 3       | 25        | 73     | 13332    | 0.12      | 0.005475548 | 21.91561644     | 55;2697;55B;GJA1;M  |           | 0.000332221 | 0.004797278 | biological_process |
| GO:0002092 | positive regulation of receptor internalization         | 2       | 25        | 15     | 13332    | 0.08      | 0.001125113 | 71.104          | 1813;7422RD2;VEGF   |           | 0.000349211 | 0.004484866 | biological_process |
| GO:0043491 | protein kinase B signaling                              | 2       | 25        | 16     | 13332    | 0.08      | 0.00120012  | 66.66           | 3791;5728DR;PTEN    |           | 0.00039864  | 0.00532996  | biological_process |
| GO:0046326 | positive regulation of glucose import                   | 2       | 25        | 17     | 13332    | 0.08      | 0.001275128 | 62.73882353     | 1432;4780PK14;NFE   |           | 0.000451273 | 0.005818193 | biological_process |
| GO:0042826 | histone deacetylase binding                             | 3       | 25        | 77     | 12391    | 0.12      | 0.006214188 | 19.31064935     | 53;7155;55;TOP2B;N  |           | 0.000480934 | 0.017475883 | molecular_function |
| GO:0051894 | positive regulation of focal adhesion assembly          | 2       | 25        | 18     | 13332    | 0.08      | 0.001350135 | 59.25333333     | 3791;7422DR;VEGF    |           | 0.000507098 | 0.006312502 | biological_process |
| GO:0051898 | negative regulation of protein kinase B signaling       | 2       | 25        | 19     | 13332    | 0.08      | 0.001425143 | 56.13473684     | 1813;5728RD2;PTEI   |           | 0.000566106 | 0.006592397 | biological_process |
| GO:0035094 | response to nicotine                                    | 2       | 25        | 19     | 13332    | 0.08      | 0.001425143 | 56.13473684     | 1813;1139;D2;CHRN   |           | 0.000566106 | 0.006592397 | biological_process |
| GO:0046982 | protein heterodimerization activity                     | 5       | 25        | 357    | 12391    | 0.2       | 0.028811234 | 6.941736695     | ;6;1813;71R;DRD2;T  |           | 0.000637377 | 0.017475883 | molecular_function |
| GO:0019899 | enzyme binding                                          | 4       | 25        | 203    | 12391    | 0.16      | 0.016382859 | 9.766305419     | ;7155;5599OP2B;MA   |           | 0.000675386 | 0.017475883 | molecular_function |
| GO:0070374 | positive regulation of ERK1 and ERK2 cascade            | 3       | 25        | 95     | 13332    | 0.12      | 0.007125713 | 16.84042105     | 91;1139;18CHRNA7;I  |           | 0.00071951  | 0.008116969 | biological_process |
| GO:0004879 | nuclear receptor activity                               | 2       | 25        | 21     | 12391    | 0.08      | 0.001694778 | 47.20380952     | 5468;196PARG;AH     |           | 0.000801646 | 0.017475883 | molecular_function |
| GO:0010595 | positive regulation of endothelial cell migration       | 2       | 25        | 24     | 13332    | 0.08      | 0.00180018  | 44.44           | 3791;7422DR;VEGF    |           | 0.000908481 | 0.009938229 | biological_process |
| GO:0051879 | Hsp90 protein binding                                   | 2       | 25        | 24     | 12391    | 0.08      | 0.00193689  | 41.30333333     | 196;3791AHR;KDR     |           | 0.001049692 | 0.019069409 | molecular_function |
| GO:0070301 | cellular response to hydrogen peroxide                  | 2       | 25        | 28     | 13332    | 0.08      | 0.00210021  | 38.09142857     | 5599;4780PK8;NFE    |           | 0.001238521 | 0.013150175 | biological_process |
| GO:0001938 | positive regulation of endothelial cell proliferation   | 2       | 25        | 30     | 13332    | 0.08      | 0.002250225 | 35.552          | 3791;7422DR;VEGF    |           | 0.001422012 | 0.014259623 | biological_process |
| GO:0043406 | positive regulation of MAP kinase activity              | 2       | 25        | 30     | 13332    | 0.08      | 0.002250225 | 35.552          | 7422;5294GFA;PIK3   |           | 0.001422012 | 0.014259623 | biological_process |
| GO:0016328 | lateral plasma membrane                                 | 2       | 25        | 35     | 14857    | 0.08      | 0.002355792 | 33.95885714     | 1813;2697RD2;GJA    |           | 0.001563339 | 0.05033177  | cellular_component |
| GO:0043679 | axon terminus                                           | 2       | 25        | 38     | 14857    | 0.08      | 0.002557717 | 31.27789474     | 1813;2002RD2;ELK    |           | 0.001841406 | 0.05033177  | cellular_component |
| GO:0009636 | response to toxic substance                             | 2       | 25        | 35     | 13332    | 0.08      | 0.002625263 | 30.47314286     | 196;1813AHR;DRD     |           | 0.00193392  | 0.018372237 | biological_process |
| GO:0032147 | activation of protein kinase activity                   | 2       | 25        | 35     | 13332    | 0.08      | 0.002625263 | 30.47314286     | 1813;7422RD2;VEGF   |           | 0.00193392  | 0.018372237 | biological_process |
| GO:0005080 | protein kinase C binding                                | 2       | 25        | 25     | 12391    | 0.08      | 0.002824621 | 28.22228571     | 7155;7153P2B;TOP    |           | 0.002222284 | 0.02850172  | molecular_function |

|            |                                                                   |    |    |      |       |      |             |             |                      |             |             |                    |
|------------|-------------------------------------------------------------------|----|----|------|-------|------|-------------|-------------|----------------------|-------------|-------------|--------------------|
| GO:0003707 | steroid hormone receptor activity                                 | 2  | 25 | 36   | 12391 | 0.08 | 0.002905335 | 27.53555556 | 5468;6256;ARG;RXR    | 0.002360784 | 0.02859172  | molecular_function |
| GO:0008144 | drug binding                                                      | 2  | 25 | 36   | 12391 | 0.08 | 0.002905335 | 27.53555556 | 1813;7153;RD2;TOP2   | 0.002360784 | 0.02859172  | molecular_function |
| GO:0044212 | transcription regulatory region DNA binding                       | 3  | 25 | 143  | 12391 | 0.12 | 0.011540634 | 10.39804196 | 168;196;47;G;AHR;NI  | 0.002873887 | 0.028820408 | molecular_function |
| GO:0030374 | dependent nuclear receptor transcription coactivator              | 2  | 25 | 40   | 12391 | 0.08 | 0.003228149 | 24.782      | 5468;1049;ARG;NCO    | 0.002908481 | 0.028820408 | molecular_function |
| GO:0006915 | apoptotic process                                                 | 4  | 25 | 336  | 13332 | 0.16 | 0.02520252  | 6.348571429 | 1432;2697;APK14;GJ   | 0.003297613 | 0.029979837 | biological_process |
| GO:0006874 | cellular calcium ion homeostasis                                  | 2  | 25 | 46   | 13332 | 0.08 | 0.003450345 | 23.18608696 | 1813;1139;D2;CHRN    | 0.003321866 | 0.029979837 | biological_process |
| GO:0005737 | cytoplasm                                                         | 12 | 25 | 3289 | 14857 | 0.48 | 0.221377129 | 2.168245667 | );332;196;IIRC5;AHR  | 0.003789997 | 0.07769494  | cellular_component |
| GO:0010628 | positive regulation of gene expression                            | 3  | 25 | 176  | 13332 | 0.12 | 0.01320132  | 9.09        | 97;5599;47;MAPK8;N   | 0.004201212 | 0.036833704 | biological_process |
| GO:0071356 | cellular response to tumor necrosis factor                        | 2  | 25 | 53   | 13332 | 0.08 | 0.003975398 | 20.12377358 | 1432;4780;PK14;NFE   | 0.004387394 | 0.036833704 | biological_process |
| GO:0032091 | negative regulation of protein binding                            | 2  | 25 | 53   | 13332 | 0.08 | 0.003975398 | 20.12377358 | 5599;6590;APK8;SLI   | 0.004387394 | 0.036833704 | biological_process |
| GO:0016301 | kinase activity                                                   | 2  | 25 | 50   | 12391 | 0.08 | 0.004035187 | 19.8256     | 5294;5599;3;CG;MAF   | 0.004511816 | 0.040982325 | molecular_function |
| GO:0016925 | protein sumoylation                                               | 2  | 25 | 54   | 13332 | 0.08 | 0.004050405 | 19.75111111 | 7155;7153;P2B;TOP    | 0.004550923 | 0.037338255 | biological_process |
| GO:0007059 | chromosome segregation                                            | 2  | 25 | 55   | 13332 | 0.08 | 0.004125413 | 19.392      | 332;7153;RC5;TOP     | 0.004717249 | 0.037842818 | biological_process |
| GO:0071456 | cellular response to hypoxia                                      | 2  | 25 | 56   | 13332 | 0.08 | 0.00420042  | 19.04571429 | 7422;4780;GFA;NFE    | 0.004886361 | 0.038347313 | biological_process |
| GO:0007409 | axonogenesis                                                      | 2  | 25 | 66   | 13332 | 0.08 | 0.004950495 | 16.16       | 7155;1813;P2B;DRI    | 0.006728525 | 0.039071008 | biological_process |
| GO:0030336 | negative regulation of cell migration                             | 2  | 25 | 66   | 13332 | 0.08 | 0.004950495 | 16.16       | 1813;5728;RD2;PTE    | 0.006728525 | 0.039071008 | biological_process |
| GO:0007204 | positive regulation of cytosolic calcium ion concentration        | 2  | 25 | 68   | 13332 | 0.08 | 0.00510051  | 15.68470588 | 2697;5294;AI1;PIK3C  | 0.00712939  | 0.039071008 | biological_process |
| GO:0003700 | DNA binding transcription factor activity                         | 5  | 25 | 642  | 12391 | 0.2  | 0.051811799 | 3.860124611 | 302;196;54;K1;AHR;PI | 0.008228598 | 0.050505078 | molecular_function |
| GO:0097441 | basal dendrite                                                    | 1  | 25 | 5    | 14857 | 0.04 | 0.000336542 | 118.856     | 5599;MAPK8           | 0.0083864   | 0.087382327 | cellular_component |
| GO:1903169 | regulation of calcium ion transmembrane transport                 | 1  | 25 | 5    | 13332 | 0.04 | 0.000375038 | 106.656     | 5294;PIK3CG          | 0.009342237 | 0.039071008 | biological_process |
| GO:0071803 | positive regulation of podosome assembly                          | 1  | 25 | 5    | 13332 | 0.04 | 0.000375038 | 106.656     | 5599;MAPK8           | 0.009342237 | 0.039071008 | biological_process |
| GO:0015867 | ATP transport                                                     | 1  | 25 | 5    | 13332 | 0.04 | 0.000375038 | 106.656     | 2697;GJA1            | 0.009342237 | 0.039071008 | biological_process |
| GO:0035815 | positive regulation of renal sodium excretion                     | 1  | 25 | 5    | 13332 | 0.04 | 0.000375038 | 106.656     | 1813;DRD2            | 0.009342237 | 0.039071008 | biological_process |
| GO:0071467 | cellular response to pH                                           | 1  | 25 | 5    | 13332 | 0.04 | 0.000375038 | 106.656     | 2697;GJA1            | 0.009342237 | 0.039071008 | biological_process |
| GO:0048149 | behavioral response to ethanol                                    | 1  | 25 | 5    | 13332 | 0.04 | 0.000375038 | 106.656     | 1813;DRD2            | 0.009342237 | 0.039071008 | biological_process |
| GO:0035148 | tube formation                                                    | 1  | 25 | 5    | 13332 | 0.04 | 0.000375038 | 106.656     | 7422;VEGFA           | 0.009342237 | 0.039071008 | biological_process |
| GO:0071732 | cellular response to nitric oxide                                 | 1  | 25 | 5    | 13332 | 0.04 | 0.000375038 | 106.656     | 5599;MAPK8           | 0.009342237 | 0.039071008 | biological_process |
| GO:0140059 | dendrite arborization                                             | 1  | 25 | 5    | 13332 | 0.04 | 0.000375038 | 106.656     | 1139;CHRNA7          | 0.009342237 | 0.039071008 | biological_process |
| GO:0051146 | striated muscle cell differentiation                              | 1  | 25 | 5    | 13332 | 0.04 | 0.000375038 | 106.656     | 1432;MAPK14          | 0.009342237 | 0.039071008 | biological_process |
| GO:0002070 | epithelial cell maturation                                        | 1  | 25 | 5    | 13332 | 0.04 | 0.000375038 | 106.656     | 2697;GJA1            | 0.009342237 | 0.039071008 | biological_process |
| GO:0051823 | regulation of synapse structural plasticity                       | 1  | 25 | 5    | 13332 | 0.04 | 0.000375038 | 106.656     | 1813;DRD2            | 0.009342237 | 0.039071008 | biological_process |
| GO:0071276 | cellular response to cadmium ion                                  | 1  | 25 | 5    | 13332 | 0.04 | 0.000375038 | 106.656     | 5599;MAPK8           | 0.009342237 | 0.039071008 | biological_process |
| GO:0060754 | positive regulation of mast cell chemotaxis                       | 1  | 25 | 5    | 13332 | 0.04 | 0.000375038 | 106.656     | 7422;VEGFA           | 0.009342237 | 0.039071008 | biological_process |
| GO:0035162 | embryonic hemopoiesis                                             | 1  | 25 | 5    | 13332 | 0.04 | 0.000375038 | 106.656     | 3791;KDR             | 0.009342237 | 0.039071008 | biological_process |
| GO:0051770 | positive regulation of nitric-oxide synthase biosynthetic process | 1  | 25 | 5    | 13332 | 0.04 | 0.000375038 | 106.656     | 3791;KDR             | 0.009342237 | 0.039071008 | biological_process |
| GO:0030522 | intracellular receptor signaling pathway                          | 1  | 25 | 5    | 13332 | 0.04 | 0.000375038 | 106.656     | 10499;NCOA2          | 0.009342237 | 0.039071008 | biological_process |
| GO:0021853 | cerebral cortex GABAergic interneuron migration                   | 1  | 25 | 5    | 13332 | 0.04 | 0.000375038 | 106.656     | 1813;DRD2            | 0.009342237 | 0.039071008 | biological_process |
| GO:0002526 | acute inflammatory response                                       | 1  | 25 | 5    | 13332 | 0.04 | 0.000375038 | 106.656     | 9536;PTGES           | 0.009342237 | 0.039071008 | biological_process |
| GO:0010818 | T cell chemotaxis                                                 | 1  | 25 | 5    | 13332 | 0.04 | 0.000375038 | 106.656     | 5294;PIK3CG          | 0.009342237 | 0.039071008 | biological_process |
| GO:0030529 | intracellular ribonucleoprotein complex                           | 2  | 25 | 88   | 14857 | 0.08 | 0.005923134 | 13.50636364 | 7155;7153;P2B;TOP    | 0.009524666 | 0.087382327 | cellular_component |
| GO:0005021 | vascular endothelial growth factor-activated receptor activity    | 1  | 25 | 5    | 12391 | 0.04 | 0.000403519 | 99.128      | 3791;KDR             | 0.010048958 | 0.050505078 | molecular_function |
| GO:0004032 | aldol:NADP+ 1-oxidoreductase activity                             | 1  | 25 | 5    | 12391 | 0.04 | 0.000403519 | 99.128      | 231;AKR1B1           | 0.010048958 | 0.050505078 | molecular_function |
| GO:0043184 | vascular endothelial growth factor receptor 2 binding             | 1  | 25 | 5    | 12391 | 0.04 | 0.000403519 | 99.128      | 7422;VEGFA           | 0.010048958 | 0.050505078 | molecular_function |
| GO:0035005 | 1-phosphatidylinositol-4-phosphate 3-kinase activity              | 1  | 25 | 5    | 12391 | 0.04 | 0.000403519 | 99.128      | 5294;PIK3CG          | 0.010048958 | 0.050505078 | molecular_function |
| GO:0048273 | mitogen-activated protein kinase p38 binding                      | 1  | 25 | 5    | 12391 | 0.04 | 0.000403519 | 99.128      | 1432;MAPK14          | 0.010048958 | 0.050505078 | molecular_function |
| GO:0071253 | connexin binding                                                  | 1  | 25 | 5    | 12391 | 0.04 | 0.000403519 | 99.128      | 2697;GJA1            | 0.010048958 | 0.050505078 | molecular_function |
| GO:0015643 | toxic substance binding                                           | 1  | 25 | 5    | 12391 | 0.04 | 0.000403519 | 99.128      | 1139;CHRNA7          | 0.010048958 | 0.050505078 | molecular_function |
| GO:0043220 | Schmidt-Lanterman incisure                                        | 1  | 25 | 6    | 14857 | 0.04 | 0.00040385  | 99.04666667 | 231;AKR1B1           | 0.010055559 | 0.087382327 | cellular_component |
| GO:0008285 | negative regulation of cell proliferation                         | 3  | 25 | 243  | 13332 | 0.12 | 0.018226823 | 6.583703704 | 13;9536;572;PTGES;I  | 0.010229884 | 0.039071008 | biological_process |
| GO:0030165 | PDZ domain binding                                                | 2  | 25 | 77   | 12391 | 0.08 | 0.006214188 | 12.87376622 | 2607;5728;IA1;PTEN   | 0.010424461 | 0.050505078 | molecular_function |

|            |                                                                    |    |    |      |       |      |             |             |                     |             |             |                    |                    |
|------------|--------------------------------------------------------------------|----|----|------|-------|------|-------------|-------------|---------------------|-------------|-------------|--------------------|--------------------|
| GO:0005125 | cytokine activity                                                  | 2  | 25 | 79   | 12391 | 0.08 | 0.006375595 | 12.5478481  | 7422;3565/EGFA;IL-  | 0.010949724 | 0.050505078 | molecular_function |                    |
| GO:0060044 | negative regulation of cardiac muscle cell proliferation           | 1  | 25 | 6    | 13332 | 0.04 | 0.000450045 | 88.88       | 2697                | GJA1        | 0.011200603 | 0.039071008        | biological_process |
| GO:1903206 | positive regulation of hydrogen peroxide-induced cell death        | 1  | 25 | 6    | 13332 | 0.04 | 0.000450045 | 88.88       | 4780                | NFE2L2      | 0.011200603 | 0.039071008        | biological_process |
| GO:0035994 | response to muscle stretch                                         | 1  | 25 | 6    | 13332 | 0.04 | 0.000450045 | 88.88       | 1432                | MAPK14      | 0.011200603 | 0.039071008        | biological_process |
| GO:0010831 | positive regulation of myotube differentiation                     | 1  | 25 | 6    | 13332 | 0.04 | 0.000450045 | 88.88       | 1432                | MAPK14      | 0.011200603 | 0.039071008        | biological_process |
| GO:0032495 | response to muramyl dipeptide                                      | 1  | 25 | 6    | 13332 | 0.04 | 0.000450045 | 88.88       | 1432                | MAPK14      | 0.011200603 | 0.039071008        | biological_process |
| GO:0071223 | cellular response to lipoteichoic acid                             | 1  | 25 | 6    | 13332 | 0.04 | 0.000450045 | 88.88       | 1432                | MAPK14      | 0.011200603 | 0.039071008        | biological_process |
| GO:0042770 | signal transduction in response to DNA damage                      | 1  | 25 | 6    | 13332 | 0.04 | 0.000450045 | 88.88       | 1432                | MAPK14      | 0.011200603 | 0.039071008        | biological_process |
| GO:0060373 | influx of ventricular cardiac muscle cell membrane depolarization  | 1  | 25 | 6    | 13332 | 0.04 | 0.000450045 | 88.88       | 2697                | GJA1        | 0.011200603 | 0.039071008        | biological_process |
| GO:0042304 | regulation of fatty acid biosynthetic process                      | 1  | 25 | 6    | 13332 | 0.04 | 0.000450045 | 88.88       | 3692                | EIF6        | 0.011200603 | 0.039071008        | biological_process |
| GO:0009410 | response to xenobiotic stimulus                                    | 1  | 25 | 6    | 13332 | 0.04 | 0.000450045 | 88.88       | 196                 | AHR         | 0.011200603 | 0.039071008        | biological_process |
| GO:0051272 | positive regulation of cellular component movement                 | 1  | 25 | 6    | 13332 | 0.04 | 0.000450045 | 88.88       | 7422                | VEGFA       | 0.011200603 | 0.039071008        | biological_process |
| GO:0002031 | G-protein coupled receptor internalization                         | 1  | 25 | 6    | 13332 | 0.04 | 0.000450045 | 88.88       | 1813                | DRD2        | 0.011200603 | 0.039071008        | biological_process |
| GO:0060158 | lipase C-activating dopamine receptor signaling pathway            | 1  | 25 | 6    | 13332 | 0.04 | 0.000450045 | 88.88       | 1813                | DRD2        | 0.011200603 | 0.039071008        | biological_process |
| GO:0060124 | positive regulation of growth hormone secretion                    | 1  | 25 | 6    | 13332 | 0.04 | 0.000450045 | 88.88       | 1813                | DRD2        | 0.011200603 | 0.039071008        | biological_process |
| GO:1901653 | cellular response to peptide                                       | 1  | 25 | 6    | 13332 | 0.04 | 0.000450045 | 88.88       | 231                 | AKR1B1      | 0.011200603 | 0.039071008        | biological_process |
| GO:0055118 | negative regulation of cardiac muscle contraction                  | 1  | 25 | 6    | 13332 | 0.04 | 0.000450045 | 88.88       | 5294                | PIK3CG      | 0.011200603 | 0.039071008        | biological_process |
| GO:0095500 | acetylcholine receptor signaling pathway                           | 1  | 25 | 6    | 13332 | 0.04 | 0.000450045 | 88.88       | 1139                | CHRNA7      | 0.011200603 | 0.039071008        | biological_process |
| GO:0031223 | auditory behavior                                                  | 1  | 25 | 6    | 13332 | 0.04 | 0.000450045 | 88.88       | 1813                | DRD2        | 0.011200603 | 0.039071008        | biological_process |
| GO:0071374 | cellular response to parathyroid hormone stimulus                  | 1  | 25 | 6    | 13332 | 0.04 | 0.000450045 | 88.88       | 2697                | GJA1        | 0.011200603 | 0.039071008        | biological_process |
| GO:0001516 | prostaglandin biosynthetic process                                 | 1  | 25 | 6    | 13332 | 0.04 | 0.000450045 | 88.88       | 9536                | PTGES       | 0.011200603 | 0.039071008        | biological_process |
| GO:0005654 | nucleoplasm                                                        | 9  | 25 | 2356 | 14857 | 0.36 | 0.158578448 | 2.270169779 | 32;4780;206;NFE2L2; | 0.01138367  | 0.087382327 | cellular_component |                    |
| GO:0006357 | inhibition of transcription from RNA polymerase II promoter        | 3  | 25 | 254  | 13332 | 0.12 | 0.019051905 | 6.298582677 | 348;196;142;AHR;MA  | 0.011532131 | 0.039071008 | biological_process |                    |
| GO:0005634 | nucleus                                                            | 13 | 25 | 4252 | 14857 | 0.52 | 0.28619506  | 1.816942615 | 780;2002;3;L2;ELK1; | 0.011548356 | 0.087382327 | cellular_component |                    |
| GO:0005916 | fascia adherens                                                    | 1  | 25 | 7    | 14857 | 0.04 | 0.000471158 | 84.89714286 | 2697                | GJA1        | 0.011722019 | 0.087382327        | cellular_component |
| GO:0033010 | paranodal junction                                                 | 1  | 25 | 7    | 14857 | 0.04 | 0.000471158 | 84.89714286 | 231                 | AKR1B1      | 0.011722019 | 0.087382327        | cellular_component |
| GO:0008083 | growth factor activity                                             | 2  | 25 | 82   | 12391 | 0.08 | 0.006617706 | 12.08878049 | 7422;3565/EGFA;IL-  | 0.011759236 | 0.050505078 | molecular_function |                    |
| GO:0043023 | ribosomal large subunit binding                                    | 1  | 25 | 6    | 12391 | 0.04 | 0.000484222 | 82.60666667 | 3692                | EIF6        | 0.012047083 | 0.050505078        | molecular_function |
| GO:0017081 | chloride channel regulator activity                                | 1  | 25 | 6    | 12391 | 0.04 | 0.000484222 | 82.60666667 | 1139                | CHRNA7      | 0.012047083 | 0.050505078        | molecular_function |
| GO:0001162 | intronic transcription regulatory region sequence-specific binding | 1  | 25 | 6    | 12391 | 0.04 | 0.000484222 | 82.60666667 | 10499               | NCOA2       | 0.012047083 | 0.050505078        | molecular_function |
| GO:0010629 | negative regulation of gene expression                             | 2  | 25 | 93   | 13332 | 0.08 | 0.006975698 | 11.4683871  | 3791;2697;KDR;GJA1  | 0.013011614 | 0.039071008 | biological_process |                    |
| GO:0001963 | synaptic transmission, dopaminergic                                | 1  | 25 | 7    | 13332 | 0.04 | 0.000525053 | 76.18285714 | 1813                | DRD2        | 0.013055622 | 0.039071008        | biological_process |
| GO:2000810 | regulation of bicellular tight junction assembly                   | 1  | 25 | 7    | 13332 | 0.04 | 0.000525053 | 76.18285714 | 2697                | GJA1        | 0.013055622 | 0.039071008        | biological_process |
| GO:0006693 | prostaglandin metabolic process                                    | 1  | 25 | 7    | 13332 | 0.04 | 0.000525053 | 76.18285714 | 9536                | PTGES       | 0.013055622 | 0.039071008        | biological_process |
| GO:0090050 | regulation of cell migration involved in sprouting angiogenesis    | 1  | 25 | 7    | 13332 | 0.04 | 0.000525053 | 76.18285714 | 7422                | VEGFA       | 0.013055622 | 0.039071008        | biological_process |
| GO:0042417 | dopamine metabolic process                                         | 1  | 25 | 7    | 13332 | 0.04 | 0.000525053 | 76.18285714 | 1813                | DRD2        | 0.013055622 | 0.039071008        | biological_process |
| GO:0010759 | positive regulation of macrophage chemotaxis                       | 1  | 25 | 7    | 13332 | 0.04 | 0.000525053 | 76.18285714 | 1432                | MAPK14      | 0.013055622 | 0.039071008        | biological_process |
| GO:0019395 | fatty acid oxidation                                               | 1  | 25 | 7    | 13332 | 0.04 | 0.000525053 | 76.18285714 | 1432                | MAPK14      | 0.013055622 | 0.039071008        | biological_process |
| GO:0061045 | negative regulation of wound healing                               | 1  | 25 | 7    | 13332 | 0.04 | 0.000525053 | 76.18285714 | 2697                | GJA1        | 0.013055622 | 0.039071008        | biological_process |
| GO:0006700 | C21-steroid hormone biosynthetic process                           | 1  | 25 | 7    | 13332 | 0.04 | 0.000525053 | 76.18285714 | 231                 | AKR1B1      | 0.013055622 | 0.039071008        | biological_process |
| GO:0044597 | daunorubicin metabolic process                                     | 1  | 25 | 7    | 13332 | 0.04 | 0.000525053 | 76.18285714 | 231                 | AKR1B1      | 0.013055622 | 0.039071008        | biological_process |
| GO:0043666 | regulation of phosphoprotein phosphatase activity                  | 1  | 25 | 7    | 13332 | 0.04 | 0.000525053 | 76.18285714 | 1813                | DRD2        | 0.013055622 | 0.039071008        | biological_process |
| GO:0051967 | positive regulation of synaptic transmission, glutamatergic        | 1  | 25 | 7    | 13332 | 0.04 | 0.000525053 | 76.18285714 | 1813                | DRD2        | 0.013055622 | 0.039071008        | biological_process |
| GO:0035767 | endothelial cell chemotaxis                                        | 1  | 25 | 7    | 13332 | 0.04 | 0.000525053 | 76.18285714 | 7422                | VEGFA       | 0.013055622 | 0.039071008        | biological_process |
| GO:0016264 | gap junction assembly                                              | 1  | 25 | 7    | 13332 | 0.04 | 0.000525053 | 76.18285714 | 2697                | GJA1        | 0.013055622 | 0.039071008        | biological_process |
| GO:1903071 | inhibition of ER-associated ubiquitin-dependent protein catabolism | 1  | 25 | 7    | 13332 | 0.04 | 0.000525053 | 76.18285714 | 4780                | NFE2L2      | 0.013055622 | 0.039071008        | biological_process |
| GO:0046697 | decidualization                                                    | 1  | 25 | 7    | 13332 | 0.04 | 0.000525053 | 76.18285714 | 2697                | GJA1        | 0.013055622 | 0.039071008        | biological_process |
| GO:0002675 | positive regulation of acute inflammatory response                 | 1  | 25 | 7    | 13332 | 0.04 | 0.000525053 | 76.18285714 | 5294                | PIK3CG      | 0.013055622 | 0.039071008        | biological_process |
| GO:0007614 | short-term memory                                                  | 1  | 25 | 7    | 13332 | 0.04 | 0.000525053 | 76.18285714 | 1139                | CHRNA7      | 0.013055622 | 0.039071008        | biological_process |
| GO:0030278 | regulation of ossification                                         | 1  | 25 | 7    | 13332 | 0.04 | 0.000525053 | 76.18285714 | 1432                | MAPK14      | 0.013055622 | 0.039071008        | biological_process |

|            |                                                                     |   |    |     |       |      |             |             |            |           |             |             |                    |
|------------|---------------------------------------------------------------------|---|----|-----|-------|------|-------------|-------------|------------|-----------|-------------|-------------|--------------------|
| GO:1902004 | positive regulation of amyloid-beta formation                       | 1 | 25 | 7   | 13332 | 0.04 | 0.000525053 | 76.18285714 | 1139       | CHRNA7    | 0.013055622 | 0.039071008 | biological_process |
| GO:0030432 | peristalsis                                                         | 1 | 25 | 7   | 13332 | 0.04 | 0.000525053 | 76.18285714 | 1813       | DRD2      | 0.013055622 | 0.039071008 | biological_process |
| GO:0044598 | doxorubicin metabolic process                                       | 1 | 25 | 7   | 13332 | 0.04 | 0.000525053 | 76.18285714 | 231        | AKR1B1    | 0.013055622 | 0.039071008 | biological_process |
| GO:0048263 | determination of dorsal identity                                    | 1 | 25 | 7   | 13332 | 0.04 | 0.000525053 | 76.18285714 | 5599       | MAPK8     | 0.013055622 | 0.039071008 | biological_process |
| GO:2001214 | positive regulation of vasculogenesis                               | 1 | 25 | 7   | 13332 | 0.04 | 0.000525053 | 76.18285714 | 3791       | KDR       | 0.013055622 | 0.039071008 | biological_process |
| GO:0030225 | macrophage differentiation                                          | 1 | 25 | 7   | 13332 | 0.04 | 0.000525053 | 76.18285714 | 7422       | VEGFA     | 0.013055622 | 0.039071008 | biological_process |
| GO:0005243 | gap junction channel activity                                       | 1 | 25 | 7   | 12391 | 0.04 | 0.000564926 | 70.80571429 | 2697       | GJA1      | 0.014041336 | 0.05460806  | molecular_function |
| GO:0008094 | DNA-dependent ATPase activity                                       | 1 | 25 | 7   | 12391 | 0.04 | 0.000564926 | 70.80571429 | 7153       | TOP2A     | 0.014041336 | 0.05460806  | molecular_function |
| GO:0008284 | positive regulation of cell proliferation                           | 3 | 25 | 279 | 13332 | 0.12 | 0.020927093 | 5.734193548 | 91;1139;74 | CHRNA7;V  | 0.014836595 | 0.039071008 | biological_process |
| GO:0086014 | atrial cardiac muscle cell action potential                         | 1 | 25 | 8   | 13332 | 0.04 | 0.00060006  | 66.66       | 2697       | GJA1      | 0.0149073   | 0.039071008 | biological_process |
| GO:0060371 | inactivation of atrial cardiac muscle cell membrane depolarization  | 1 | 25 | 8   | 13332 | 0.04 | 0.00060006  | 66.66       | 2697       | GJA1      | 0.0149073   | 0.039071008 | biological_process |
| GO:0035810 | positive regulation of urine volume                                 | 1 | 25 | 8   | 13332 | 0.04 | 0.00060006  | 66.66       | 1813       | DRD2      | 0.0149073   | 0.039071008 | biological_process |
| GO:0045475 | locomotor rhythm                                                    | 1 | 25 | 8   | 13332 | 0.04 | 0.00060006  | 66.66       | 10499      | NCOA2     | 0.0149073   | 0.039071008 | biological_process |
| GO:0045745 | regulation of G-protein coupled receptor protein signaling          | 1 | 25 | 8   | 13332 | 0.04 | 0.00060006  | 66.66       | 1813       | DRD2      | 0.0149073   | 0.039071008 | biological_process |
| GO:0007178 | invariant receptor protein serine/threonine kinase signaling        | 1 | 25 | 8   | 13332 | 0.04 | 0.00060006  | 66.66       | 1432       | MAPK14    | 0.0149073   | 0.039071008 | biological_process |
| GO:0048148 | behavioral response to cocaine                                      | 1 | 25 | 8   | 13332 | 0.04 | 0.00060006  | 66.66       | 1813       | DRD2      | 0.0149073   | 0.039071008 | biological_process |
| GO:0033628 | regulation of cell adhesion mediated by integrin                    | 1 | 25 | 8   | 13332 | 0.04 | 0.00060006  | 66.66       | 5294       | PIK3CG    | 0.0149073   | 0.039071008 | biological_process |
| GO:1901386 | positive regulation of voltage-gated calcium channel activation     | 1 | 25 | 8   | 13332 | 0.04 | 0.00060006  | 66.66       | 1813       | DRD2      | 0.0149073   | 0.039071008 | biological_process |
| GO:0050872 | white fat cell differentiation                                      | 1 | 25 | 8   | 13332 | 0.04 | 0.00060006  | 66.66       | 5468       | PPARG     | 0.0149073   | 0.039071008 | biological_process |
| GO:2000279 | negative regulation of DNA biosynthetic process                     | 1 | 25 | 8   | 13332 | 0.04 | 0.00060006  | 66.66       | 2697       | GJA1      | 0.0149073   | 0.039071008 | biological_process |
| GO:0021756 | striatum development                                                | 1 | 25 | 8   | 13332 | 0.04 | 0.00060006  | 66.66       | 1813       | DRD2      | 0.0149073   | 0.039071008 | biological_process |
| GO:0051481 | negative regulation of cytosolic calcium ion concentration          | 1 | 25 | 8   | 13332 | 0.04 | 0.00060006  | 66.66       | 1813       | DRD2      | 0.0149073   | 0.039071008 | biological_process |
| GO:0030949 | inhibition of vascular endothelial growth factor receptor signaling | 1 | 25 | 8   | 13332 | 0.04 | 0.00060006  | 66.66       | 7422       | VEGFA     | 0.0149073   | 0.039071008 | biological_process |
| GO:0010039 | response to iron ion                                                | 1 | 25 | 8   | 13332 | 0.04 | 0.00060006  | 66.66       | 1813       | DRD2      | 0.0149073   | 0.039071008 | biological_process |
| GO:0060134 | prepulse inhibition                                                 | 1 | 25 | 8   | 13332 | 0.04 | 0.00060006  | 66.66       | 1813       | DRD2      | 0.0149073   | 0.039071008 | biological_process |
| GO:0046855 | inositol phosphate dephosphorylation                                | 1 | 25 | 8   | 13332 | 0.04 | 0.00060006  | 66.66       | 5728       | PTEN      | 0.0149073   | 0.039071008 | biological_process |
| GO:0071498 | cellular response to fluid shear stress                             | 1 | 25 | 8   | 13332 | 0.04 | 0.00060006  | 66.66       | 4780       | NFE2L2    | 0.0149073   | 0.039071008 | biological_process |
| GO:0046686 | response to cadmium ion                                             | 1 | 25 | 8   | 13332 | 0.04 | 0.00060006  | 66.66       | 5599       | MAPK8     | 0.0149073   | 0.039071008 | biological_process |
| GO:0008360 | regulation of cell shape                                            | 2 | 25 | 100 | 13332 | 0.08 | 0.00750075  | 10.6656     | 3791;7422  | DR;VEGF   | 0.014935732 | 0.039071008 | biological_process |
| GO:0018105 | peptidyl-serine phosphorylation                                     | 2 | 25 | 103 | 13332 | 0.08 | 0.007725773 | 10.35495146 | 1432;5599  | PK14;MAPK | 0.015795837 | 0.039534555 | biological_process |
| GO:0043295 | glutathione binding                                                 | 1 | 25 | 8   | 12391 | 0.04 | 0.00064563  | 61.955      | 9536       | PTGES     | 0.016031724 | 0.05460806  | molecular_function |
| GO:0001223 | transcription coactivator binding                                   | 1 | 25 | 8   | 12391 | 0.04 | 0.00064563  | 61.955      | 196        | AHR       | 0.016031724 | 0.05460806  | molecular_function |
| GO:0005161 | platelet-derived growth factor receptor binding                     | 1 | 25 | 8   | 12391 | 0.04 | 0.00064563  | 61.955      | 7422       | VEGFA     | 0.016031724 | 0.05460806  | molecular_function |
| GO:1990782 | protein tyrosine kinase binding                                     | 1 | 25 | 8   | 12391 | 0.04 | 0.00064563  | 61.955      | 2697       | GJA1      | 0.016031724 | 0.05460806  | molecular_function |
| GO:0007507 | heart development                                                   | 2 | 25 | 104 | 13332 | 0.08 | 0.00780078  | 10.25538462 | 2697;5728  | GJA1;PTEN | 0.016087204 | 0.039534555 | biological_process |
| GO:0001894 | tissue homeostasis                                                  | 1 | 25 | 9   | 13332 | 0.04 | 0.000675068 | 59.25333333 | 231        | AKR1B1    | 0.016755642 | 0.039534555 | biological_process |
| GO:0030224 | monocyte differentiation                                            | 1 | 25 | 9   | 13332 | 0.04 | 0.000675068 | 59.25333333 | 7422       | VEGFA     | 0.016755642 | 0.039534555 | biological_process |
| GO:0071310 | cellular response to organic substance                              | 1 | 25 | 9   | 13332 | 0.04 | 0.000675068 | 59.25333333 | 5599       | MAPK8     | 0.016755642 | 0.039534555 | biological_process |
| GO:0007625 | grooming behavior                                                   | 1 | 25 | 9   | 13332 | 0.04 | 0.000675068 | 59.25333333 | 1813       | DRD2      | 0.016755642 | 0.039534555 | biological_process |
| GO:0050918 | positive chemotaxis                                                 | 1 | 25 | 9   | 13332 | 0.04 | 0.000675068 | 59.25333333 | 7422       | VEGFA     | 0.016755642 | 0.039534555 | biological_process |
| GO:0050930 | induction of positive chemotaxis                                    | 1 | 25 | 9   | 13332 | 0.04 | 0.000675068 | 59.25333333 | 7422       | VEGFA     | 0.016755642 | 0.039534555 | biological_process |
| GO:0043303 | mast cell degranulation                                             | 1 | 25 | 9   | 13332 | 0.04 | 0.000675068 | 59.25333333 | 5294       | PIK3CG    | 0.016755642 | 0.039534555 | biological_process |
| GO:0042098 | T cell proliferation                                                | 1 | 25 | 9   | 13332 | 0.04 | 0.000675068 | 59.25333333 | 5294       | PIK3CG    | 0.016755642 | 0.039534555 | biological_process |
| GO:0035195 | gene silencing by miRNA                                             | 1 | 25 | 9   | 13332 | 0.04 | 0.000675068 | 59.25333333 | 3692       | EIF6      | 0.016755642 | 0.039534555 | biological_process |
| GO:0097755 | positive regulation of blood vessel diameter                        | 1 | 25 | 9   | 13332 | 0.04 | 0.000675068 | 59.25333333 | 2697       | GJA1      | 0.016755642 | 0.039534555 | biological_process |
| GO:0071480 | cellular response to gamma radiation                                | 1 | 25 | 9   | 13332 | 0.04 | 0.000675068 | 59.25333333 | 2002       | ELK1      | 0.016755642 | 0.039534555 | biological_process |
| GO:0007512 | adult heart development                                             | 1 | 25 | 9   | 13332 | 0.04 | 0.000675068 | 59.25333333 | 2697       | GJA1      | 0.016755642 | 0.039534555 | biological_process |
| GO:0014059 | regulation of dopamine secretion                                    | 1 | 25 | 9   | 13332 | 0.04 | 0.000675068 | 59.25333333 | 1813       | DRD2      | 0.016755642 | 0.039534555 | biological_process |
| GO:0045121 | membrane raft                                                       | 2 | 25 | 121 | 14857 | 0.08 | 0.008144309 | 9.822809917 | 3791;2697  | KDR;GJA1  | 0.017463711 | 0.110542274 | cellular_component |
| GO:0015075 | ion transmembrane transporter activity                              | 1 | 25 | 0   | 12301 | 0.04 | 0.000726334 | 55.07111111 | 2697       | GJA1      | 0.018018754 | 0.058872405 | molecular_function |

|            |                                                                     |   |    |     |       |      |             |             |           |          |             |             |                    |
|------------|---------------------------------------------------------------------|---|----|-----|-------|------|-------------|-------------|-----------|----------|-------------|-------------|--------------------|
| GO:0048514 | blood vessel morphogenesis                                          | 1 | 25 | 10  | 13332 | 0.04 | 0.000750075 | 53.328      | 2697      | GJA1     | 0.018600655 | 0.041449609 | biological_process |
| GO:0032228 | regulation of synaptic transmission, GABAergic                      | 1 | 25 | 10  | 13332 | 0.04 | 0.000750075 | 53.328      | 1813      | DRD2     | 0.018600655 | 0.041449609 | biological_process |
| GO:0051403 | stress-activated FAK cascade                                        | 1 | 25 | 10  | 13332 | 0.04 | 0.000750075 | 53.328      | 5599      | MAPK8    | 0.018600655 | 0.041449609 | biological_process |
| GO:0051895 | negative regulation of focal adhesion assembly                      | 1 | 25 | 10  | 13332 | 0.04 | 0.000750075 | 53.328      | 5728      | PTEN     | 0.018600655 | 0.041449609 | biological_process |
| GO:0048169 | regulation of long-term neuronal synaptic plasticity                | 1 | 25 | 10  | 13332 | 0.04 | 0.000750075 | 53.328      | 1813      | DRD2     | 0.018600655 | 0.041449609 | biological_process |
| GO:0050709 | negative regulation of protein secretion                            | 1 | 25 | 10  | 13332 | 0.04 | 0.000750075 | 53.328      | 1813      | DRD2     | 0.018600655 | 0.041449609 | biological_process |
| GO:0032793 | positive regulation of CREB transcription factor activation         | 1 | 25 | 10  | 13332 | 0.04 | 0.000750075 | 53.328      | 7422      | VEGFA    | 0.018600655 | 0.041449609 | biological_process |
| GO:0045824 | negative regulation of innate immune response                       | 1 | 25 | 10  | 13332 | 0.04 | 0.000750075 | 53.328      | 1813      | DRD2     | 0.018600655 | 0.041449609 | biological_process |
| GO:0086064 | communication by electrical coupling involved in cardiac conduction | 1 | 25 | 10  | 13332 | 0.04 | 0.000750075 | 53.328      | 2697      | GJA1     | 0.018600655 | 0.041449609 | biological_process |
| GO:0035257 | nuclear hormone receptor binding                                    | 1 | 25 | 10  | 12391 | 0.04 | 0.000807037 | 49.564      | 10499     | NCOA2    | 0.020000934 | 0.058873495 | molecular_function |
| GO:0042166 | acetylcholine binding                                               | 1 | 25 | 10  | 12391 | 0.04 | 0.000807037 | 49.564      | 1139      | CHRNA7   | 0.020000934 | 0.058873495 | molecular_function |
| GO:0005921 | gap junction                                                        | 1 | 25 | 12  | 14857 | 0.04 | 0.0008077   | 49.52333333 | 2697      | GJA1     | 0.020014008 | 0.110542274 | cellular_component |
| GO:0051209 | release of sequestered calcium ion into cytosol                     | 1 | 25 | 11  | 13332 | 0.04 | 0.000825083 | 48.48       | 1813      | DRD2     | 0.020442345 | 0.04340992  | biological_process |
| GO:0060307 | recovery of ventricular cardiac muscle cell membrane repolarization | 1 | 25 | 11  | 13332 | 0.04 | 0.000825083 | 48.48       | 2697      | GJA1     | 0.020442345 | 0.04340992  | biological_process |
| GO:0042307 | positive regulation of protein import into nucleus                  | 1 | 25 | 11  | 13332 | 0.04 | 0.000825083 | 48.48       | 1432      | MAPK14   | 0.020442345 | 0.04340992  | biological_process |
| GO:0001659 | temperature homeostasis                                             | 1 | 25 | 11  | 13332 | 0.04 | 0.000825083 | 48.48       | 1813      | DRD2     | 0.020442345 | 0.04340992  | biological_process |
| GO:0002052 | positive regulation of neuroblast proliferation                     | 1 | 25 | 11  | 13332 | 0.04 | 0.000825083 | 48.48       | 1813      | DRD2     | 0.020442345 | 0.04340992  | biological_process |
| GO:0001816 | cytokine production                                                 | 1 | 25 | 11  | 13332 | 0.04 | 0.000825083 | 48.48       | 5294      | PIK3CG   | 0.020442345 | 0.04340992  | biological_process |
| GO:1901216 | positive regulation of neuron death                                 | 1 | 25 | 11  | 13332 | 0.04 | 0.000825083 | 48.48       | 2002      | ELK1     | 0.020442345 | 0.04340992  | biological_process |
| GO:0006801 | superoxide metabolic process                                        | 1 | 25 | 11  | 13332 | 0.04 | 0.000825083 | 48.48       | 6648      | SOD2     | 0.020442345 | 0.04340992  | biological_process |
| GO:0044853 | plasma membrane raft                                                | 1 | 25 | 13  | 14857 | 0.04 | 0.000875008 | 45.71384615 | 1139      | CHRNA7   | 0.021664372 | 0.110542274 | cellular_component |
| GO:0035326 | enhancer binding                                                    | 1 | 25 | 11  | 12391 | 0.04 | 0.000887741 | 45.05818182 | 196       | AHR      | 0.021979771 | 0.058873495 | molecular_function |
| GO:0015464 | acetylcholine receptor activity                                     | 1 | 25 | 11  | 12391 | 0.04 | 0.000887741 | 45.05818182 | 1139      | CHRNA7   | 0.021979771 | 0.058873495 | molecular_function |
| GO:0043403 | skeletal muscle tissue regeneration                                 | 1 | 25 | 12  | 13332 | 0.04 | 0.00090009  | 44.44       | 2697      | GJA1     | 0.022280716 | 0.044194167 | biological_process |
| GO:2001235 | positive regulation of apoptotic signaling pathway                  | 1 | 25 | 12  | 13332 | 0.04 | 0.00090009  | 44.44       | 5599      | MAPK8    | 0.022280716 | 0.044194167 | biological_process |
| GO:0035584 | calcium-mediated signaling using intracellular calcium source       | 1 | 25 | 12  | 13332 | 0.04 | 0.00090009  | 44.44       | 3791      | KDR      | 0.022280716 | 0.044194167 | biological_process |
| GO:1901741 | positive regulation of myoblast fusion                              | 1 | 25 | 12  | 13332 | 0.04 | 0.00090009  | 44.44       | 1432      | MAPK14   | 0.022280716 | 0.044194167 | biological_process |
| GO:0090141 | positive regulation of mitochondrial fission                        | 1 | 25 | 12  | 13332 | 0.04 | 0.00090009  | 44.44       | 3791      | KDR      | 0.022280716 | 0.044194167 | biological_process |
| GO:0060045 | positive regulation of cardiac muscle cell proliferation            | 1 | 25 | 12  | 13332 | 0.04 | 0.00090009  | 44.44       | 1432      | MAPK14   | 0.022280716 | 0.044194167 | biological_process |
| GO:0043434 | response to peptide hormone                                         | 1 | 25 | 12  | 13332 | 0.04 | 0.00090009  | 44.44       | 2697      | GJA1     | 0.022280716 | 0.044194167 | biological_process |
| GO:0097150 | neuronal stem cell population maintenance                           | 1 | 25 | 12  | 13332 | 0.04 | 0.00090009  | 44.44       | 5599      | MAPK8    | 0.022280716 | 0.044194167 | biological_process |
| GO:0043278 | response to morphine                                                | 1 | 25 | 12  | 13332 | 0.04 | 0.00090009  | 44.44       | 1813      | DRD2     | 0.022280716 | 0.044194167 | biological_process |
| GO:0010906 | regulation of glucose metabolic process                             | 1 | 25 | 12  | 13332 | 0.04 | 0.00090009  | 44.44       | 10499     | NCOA2    | 0.022280716 | 0.044194167 | biological_process |
| GO:2000377 | regulation of reactive oxygen species metabolic process             | 1 | 25 | 12  | 13332 | 0.04 | 0.00090009  | 44.44       | 3692      | EIF6     | 0.022280716 | 0.044194167 | biological_process |
| GO:0035278 | miRNA mediated inhibition of translation                            | 1 | 25 | 12  | 13332 | 0.04 | 0.00090009  | 44.44       | 3692      | EIF6     | 0.022280716 | 0.044194167 | biological_process |
| GO:0034220 | ion transmembrane transport                                         | 2 | 25 | 126 | 13332 | 0.08 | 0.009450945 | 8.464761905 | 1139;2697 | IRNA7;GJ | 0.023067841 | 0.04487523  | biological_process |
| GO:0043027 | peptidase inhibitor activity involved in apoptosis                  | 1 | 25 | 12  | 12391 | 0.04 | 0.000968445 | 41.30333333 | 332       | BIRC5    | 0.023954772 | 0.058873495 | molecular_function |
| GO:0048037 | cofactor binding                                                    | 1 | 25 | 12  | 12391 | 0.04 | 0.000968445 | 41.30333333 | 332       | BIRC5    | 0.023954772 | 0.058873495 | molecular_function |
| GO:0008301 | DNA binding, bending                                                | 1 | 25 | 12  | 12391 | 0.04 | 0.000968445 | 41.30333333 | 7153      | TOP2A    | 0.023954772 | 0.058873495 | molecular_function |
| GO:0042056 | chemoattractant activity                                            | 1 | 25 | 12  | 12391 | 0.04 | 0.000968445 | 41.30333333 | 7422      | VEGFA    | 0.023954772 | 0.058873495 | molecular_function |
| GO:0001975 | response to amphetamine                                             | 1 | 25 | 13  | 13332 | 0.04 | 0.000975098 | 41.02153846 | 1813      | DRD2     | 0.024115774 | 0.04487523  | biological_process |
| GO:1901214 | regulation of neuron death                                          | 1 | 25 | 13  | 13332 | 0.04 | 0.000975098 | 41.02153846 | 1139      | CHRNA7   | 0.024115774 | 0.04487523  | biological_process |
| GO:0001502 | cartilage condensation                                              | 1 | 25 | 13  | 13332 | 0.04 | 0.000975098 | 41.02153846 | 1432      | MAPK14   | 0.024115774 | 0.04487523  | biological_process |
| GO:0031954 | positive regulation of protein autophosphorylation                  | 1 | 25 | 13  | 13332 | 0.04 | 0.000975098 | 41.02153846 | 7422      | VEGFA    | 0.024115774 | 0.04487523  | biological_process |
| GO:0070371 | ERK1 and ERK2 cascade                                               | 1 | 25 | 13  | 13332 | 0.04 | 0.000975098 | 41.02153846 | 3791      | KDR      | 0.024115774 | 0.04487523  | biological_process |
| GO:0045648 | positive regulation of erythrocyte differentiation                  | 1 | 25 | 13  | 13332 | 0.04 | 0.000975098 | 41.02153846 | 1432      | MAPK14   | 0.024115774 | 0.04487523  | biological_process |
| GO:0000470 | maturation of LSU-rRNA                                              | 1 | 25 | 13  | 13332 | 0.04 | 0.000975098 | 41.02153846 | 3692      | EIF6     | 0.024115774 | 0.04487523  | biological_process |
| GO:0045995 | regulation of embryonic development                                 | 1 | 25 | 13  | 13332 | 0.04 | 0.000975098 | 41.02153846 | 4780      | NFE2L2   | 0.024115774 | 0.04487523  | biological_process |
| GO:0000460 | maturation of 5.8S rRNA                                             | 1 | 25 | 13  | 13332 | 0.04 | 0.000975098 | 41.02153846 | 3692      | EIF6     | 0.024115774 | 0.04487523  | biological_process |
| GO:0000077 | DNA damage checkpoint                                               | 1 | 25 | 13  | 13332 | 0.04 | 0.000975098 | 41.02153846 | 1432      | MAPK14   | 0.024115774 | 0.04487523  | biological_process |



|            |                                                              |   |    |      |       |      |             |             |                       |             |             |                    |                    |
|------------|--------------------------------------------------------------|---|----|------|-------|------|-------------|-------------|-----------------------|-------------|-------------|--------------------|--------------------|
| GO:0031663 | lipopolysaccharide-mediated signaling pathway                | 1 | 25 | 13   | 13332 | 0.04 | 0.000975098 | 41.02153846 | 1432                  | MAPK14      | 0.024115774 | 0.04487523         | biological_process |
| GO:0005524 | ATP binding                                                  | 6 | 25 | 1153 | 12391 | 0.24 | 0.093051408 | 2.579219428 | 7155;5599P2B;MAPI     | 0.024271031 | 0.058873495 | molecular_function |                    |
| GO:0042803 | protein homodimerization activity                            | 4 | 25 | 559  | 12391 | 0.16 | 0.045113389 | 3.546618962 | 1813;1139;D2;CHRN     | 0.024391969 | 0.058873495 | molecular_function |                    |
| GO:0045893 | positive regulation of transcription, DNA-templated          | 3 | 25 | 339  | 13332 | 0.12 | 0.025427543 | 4.719292035 | 168;196;20RG;AHR;E    | 0.024772012 | 0.045471151 | biological_process |                    |
| GO:0004672 | protein kinase activity                                      | 2 | 25 | 122  | 12391 | 0.08 | 0.009845856 | 8.125245902 | 5294;5599;3CG;MAF     | 0.024884109 | 0.058873495 | molecular_function |                    |
| GO:0030660 | Golgi-associated vesicle membrane                            | 1 | 25 | 15   | 14857 | 0.04 | 0.001009625 | 39.61866667 | 2697                  | GJA1        | 0.024957099 | 0.110542274        | cellular_component |
| GO:0046983 | protein dimerization activity                                | 2 | 25 | 123  | 12391 | 0.08 | 0.00992656  | 8.059186992 | 196;10499HR;NCOA      | 0.025264481 | 0.058873495 | molecular_function |                    |
| GO:0004438 | phosphatidylinositol-3-phosphatase activity                  | 1 | 25 | 133  | 12391 | 0.04 | 0.001049149 | 38.12615385 | 5728                  | PTEN        | 0.025925943 | 0.058873495        | molecular_function |
| GO:0004714 | transmembrane receptor protein tyrosine kinase activity      | 1 | 25 | 13   | 12391 | 0.04 | 0.001049149 | 38.12615385 | 3791                  | KDR         | 0.025925943 | 0.058873495        | molecular_function |
| GO:0005216 | ion channel activity                                         | 1 | 25 | 13   | 12391 | 0.04 | 0.001049149 | 38.12615385 | 1139                  | CHRNA7      | 0.025925943 | 0.058873495        | molecular_function |
| GO:0043473 | pigmentation                                                 | 1 | 25 | 14   | 13332 | 0.04 | 0.001050105 | 38.09142857 | 1813                  | DRD2        | 0.025947526 | 0.045471151        | biological_process |
| GO:0008306 | associative learning                                         | 1 | 25 | 14   | 13332 | 0.04 | 0.001050105 | 38.09142857 | 1813                  | DRD2        | 0.025947526 | 0.045471151        | biological_process |
| GO:0098586 | cellular response to virus                                   | 1 | 25 | 14   | 13332 | 0.04 | 0.001050105 | 38.09142857 | 1432                  | MAPK14      | 0.025947526 | 0.045471151        | biological_process |
| GO:0030316 | osteoclast differentiation                                   | 1 | 25 | 14   | 13332 | 0.04 | 0.001050105 | 38.09142857 | 1432                  | MAPK14      | 0.025947526 | 0.045471151        | biological_process |
| GO:0034614 | cellular response to reactive oxygen species                 | 1 | 25 | 14   | 13332 | 0.04 | 0.001050105 | 38.09142857 | 5599                  | MAPK8       | 0.025947526 | 0.045471151        | biological_process |
| GO:0045907 | positive regulation of vasoconstriction                      | 1 | 25 | 14   | 13332 | 0.04 | 0.001050105 | 38.09142857 | 2697                  | GJA1        | 0.025947526 | 0.045471151        | biological_process |
| GO:0010667 | positive regulation of cardiac muscle cell apoptotic process | 1 | 25 | 14   | 13332 | 0.04 | 0.001050105 | 38.09142857 | 4780                  | NFE2L2      | 0.025947526 | 0.045471151        | biological_process |
| GO:0016310 | phosphorylation                                              | 1 | 25 | 14   | 13332 | 0.04 | 0.001050105 | 38.09142857 | 5294                  | PIK3CG      | 0.025947526 | 0.045471151        | biological_process |
| GO:0051924 | regulation of calcium ion transport                          | 1 | 25 | 14   | 13332 | 0.04 | 0.001050105 | 38.09142857 | 2697                  | GJA1        | 0.025947526 | 0.045471151        | biological_process |
| GO:0030500 | regulation of bone mineralization                            | 1 | 25 | 14   | 13332 | 0.04 | 0.001050105 | 38.09142857 | 2697                  | GJA1        | 0.025947526 | 0.045471151        | biological_process |
| GO:0010975 | regulation of neuron projection development                  | 1 | 25 | 14   | 13332 | 0.04 | 0.001050105 | 38.09142857 | 5728                  | PTEN        | 0.025947526 | 0.045471151        | biological_process |
| GO:0000793 | condensed chromosome                                         | 1 | 25 | 16   | 14857 | 0.04 | 0.001076933 | 37.1425     | 7153                  | TOP2A       | 0.02659947  | 0.110542274        | cellular_component |
| GO:0005892 | acetylcholine-gated channel complex                          | 1 | 25 | 16   | 14857 | 0.04 | 0.001076933 | 37.1425     | 1139                  | CHRNA7      | 0.02659947  | 0.110542274        | cellular_component |
| GO:0008022 | protein C-terminus binding                                   | 2 | 25 | 129  | 12391 | 0.08 | 0.010410782 | 7.684341085 | 7155;7153P2B;TOP2A    | 0.027596727 | 0.059615076 | molecular_function |                    |
| GO:0015721 | bile acid and bile salt transport                            | 1 | 25 | 15   | 13332 | 0.04 | 0.001125113 | 35.552      | 10499                 | NCOA2       | 0.027775978 | 0.047075718        | biological_process |
| GO:0045931 | positive regulation of mitotic cell cycle                    | 1 | 25 | 15   | 13332 | 0.04 | 0.001125113 | 35.552      | 332                   | BIRC5       | 0.027775978 | 0.047075718        | biological_process |
| GO:0031334 | positive regulation of protein complex assembly              | 1 | 25 | 15   | 13332 | 0.04 | 0.001125113 | 35.552      | 7422                  | VEGFA       | 0.027775978 | 0.047075718        | biological_process |
| GO:0050482 | arachidonic acid secretion                                   | 1 | 25 | 15   | 13332 | 0.04 | 0.001125113 | 35.552      | 1813                  | DRD2        | 0.027775978 | 0.047075718        | biological_process |
| GO:0060135 | maternal process involved in female pregnancy                | 1 | 25 | 15   | 13332 | 0.04 | 0.001125113 | 35.552      | 231                   | AKR1B1      | 0.027775978 | 0.047075718        | biological_process |
| GO:0001937 | negative regulation of endothelial cell proliferation        | 1 | 25 | 15   | 13332 | 0.04 | 0.001125113 | 35.552      | 2697                  | GJA1        | 0.027775978 | 0.047075718        | biological_process |
| GO:0002028 | regulation of sodium ion transport                           | 1 | 25 | 15   | 13332 | 0.04 | 0.001125113 | 35.552      | 1813                  | DRD2        | 0.027775978 | 0.047075718        | biological_process |
| GO:0043234 | protein complex                                              | 3 | 25 | 395  | 14857 | 0.12 | 0.026586794 | 4.513518987 | 6;7153;104TOP2A;NCOA2 | 0.027810367 | 0.110542274 | cellular_component |                    |
| GO:0097718 | disordered domain specific binding                           | 1 | 25 | 14   | 12391 | 0.04 | 0.001129852 | 35.40285714 | 2697                  | GJA1        | 0.027893292 | 0.059615076        | molecular_function |
| GO:0004033 | aldo-keto reductase (NADP) activity                          | 1 | 25 | 14   | 12391 | 0.04 | 0.001129852 | 35.40285714 | 231                   | AKR1B1      | 0.027893292 | 0.059615076        | molecular_function |
| GO:0005922 | connexin complex                                             | 1 | 25 | 17   | 14857 | 0.04 | 0.001144242 | 34.95764706 | 2697                  | GJA1        | 0.028239185 | 0.110542274        | cellular_component |
| GO:0005771 | multivesicular body                                          | 1 | 25 | 17   | 14857 | 0.04 | 0.001144242 | 34.95764706 | 2697                  | GJA1        | 0.028239185 | 0.110542274        | cellular_component |
| GO:0045663 | positive regulation of myoblast differentiation              | 1 | 25 | 16   | 13332 | 0.04 | 0.00120012  | 33.33       | 1432                  | MAPK14      | 0.029601133 | 0.049472265        | biological_process |
| GO:0014065 | phosphatidylinositol 3-kinase signaling                      | 1 | 25 | 16   | 13332 | 0.04 | 0.00120012  | 33.33       | 5294                  | PIK3CG      | 0.029601133 | 0.049472265        | biological_process |
| GO:0042220 | response to cocaine                                          | 1 | 25 | 16   | 13332 | 0.04 | 0.00120012  | 33.33       | 1813                  | DRD2        | 0.029601133 | 0.049472265        | biological_process |
| GO:0001968 | fibronectin binding                                          | 1 | 25 | 15   | 12391 | 0.04 | 0.001210556 | 33.04266667 | 7422                  | VEGFA       | 0.029856827 | 0.060266558        | molecular_function |
| GO:0022848 | acetylcholine-gated cation-selective channel activity        | 1 | 25 | 15   | 12391 | 0.04 | 0.001210556 | 33.04266667 | 1139                  | CHRNA7      | 0.029856827 | 0.060266558        | molecular_function |
| GO:0016922 | ligand-dependent nuclear receptor binding                    | 1 | 25 | 15   | 12391 | 0.04 | 0.001210556 | 33.04266667 | 10499                 | NCOA2       | 0.029856827 | 0.060266558        | molecular_function |
| GO:0097730 | non-motile cilium                                            | 1 | 25 | 18   | 14857 | 0.04 | 0.00121155  | 33.01555556 | 1813                  | DRD2        | 0.029876248 | 0.110542274        | cellular_component |
| GO:0016239 | positive regulation of macroautophagy                        | 1 | 25 | 17   | 13332 | 0.04 | 0.001275128 | 31.36941176 | 3791                  | KDR         | 0.031423    | 0.052035334        | biological_process |
| GO:0042113 | B cell activation                                            | 1 | 25 | 17   | 13332 | 0.04 | 0.001275128 | 31.36941176 | 3565                  | IL4         | 0.031423    | 0.052035334        | biological_process |
| GO:0019838 | growth factor binding                                        | 1 | 25 | 16   | 12391 | 0.04 | 0.00129126  | 30.9775     | 3791                  | KDR         | 0.031816554 | 0.063054625        | molecular_function |
| GO:0098794 | postsynapse                                                  | 1 | 25 | 20   | 14857 | 0.04 | 0.001346167 | 29.714      | 1139                  | CHRNA7      | 0.033142436 | 0.110542274        | cellular_component |
| GO:0005876 | spindle microtubule                                          | 1 | 25 | 20   | 14857 | 0.04 | 0.001346167 | 29.714      | 332                   | BIRC5       | 0.033142436 | 0.110542274        | cellular_component |
| GO:0030593 | neutrophil chemotaxis                                        | 1 | 25 | 18   | 13332 | 0.04 | 0.001350135 | 29.62666667 | 5294                  | PIK3CG      | 0.033241582 | 0.053098279        | biological_process |
| GO:0010731 | antibacterial humoral response                               | 1 | 25 | 18   | 13332 | 0.04 | 0.001350135 | 29.62666667 | 6500                  | STP1        | 0.033241582 | 0.053098279        | biological_process |

|            |                                                           |   |    |      |       |      |             |             |                     |             |             |                    |                    |
|------------|-----------------------------------------------------------|---|----|------|-------|------|-------------|-------------|---------------------|-------------|-------------|--------------------|--------------------|
| GO:0060079 | excitatory postsynaptic potential                         | 1 | 25 | 18   | 13332 | 0.04 | 0.001350135 | 29.62666667 | 1813                | DRD2        | 0.033241582 | 0.053098279        | biological_process |
| GO:0007194 | negative regulation of adenylate cyclase activity         | 1 | 25 | 18   | 13332 | 0.04 | 0.001350135 | 29.62666667 | 1813                | DRD2        | 0.033241582 | 0.053098279        | biological_process |
| GO:0007628 | adult walking behavior                                    | 1 | 25 | 18   | 13332 | 0.04 | 0.001350135 | 29.62666667 | 1813                | DRD2        | 0.033241582 | 0.053098279        | biological_process |
| GO:0046856 | phosphatidylinositol dephosphorylation                    | 1 | 25 | 18   | 13332 | 0.04 | 0.001350135 | 29.62666667 | 5728                | PTEN        | 0.033241582 | 0.053098279        | biological_process |
| GO:2000463 | positive regulation of excitatory postsynaptic potential  | 1 | 25 | 18   | 13332 | 0.04 | 0.001350135 | 29.62666667 | 1139                | CHRNA7      | 0.033241582 | 0.053098279        | biological_process |
| GO:0048678 | response to axon injury                                   | 1 | 25 | 18   | 13332 | 0.04 | 0.001350135 | 29.62666667 | 1813                | DRD2        | 0.033241582 | 0.053098279        | biological_process |
| GO:0030054 | cell junction                                             | 3 | 25 | 429  | 14857 | 0.12 | 0.028875278 | 4.155804196 | 91;2697;11;GJA1;CHI | 0.034341636 | 0.110542274 | cellular_component |                    |
| GO:0045070 | positive regulation of viral genome replication           | 1 | 25 | 19   | 13332 | 0.04 | 0.001425143 | 28.06736842 | 7153                | TOP2A       | 0.035056886 | 0.055506737        | biological_process |
| GO:0045776 | negative regulation of blood pressure                     | 1 | 25 | 19   | 13332 | 0.04 | 0.001425143 | 28.06736842 | 1813                | DRD2        | 0.035056886 | 0.055506737        | biological_process |
| GO:0048018 | receptor ligand activity                                  | 1 | 25 | 18   | 12391 | 0.04 | 0.001452667 | 27.53555556 | 7422                | VEGFA       | 0.035724612 | 0.069247943        | molecular_function |
| GO:0005769 | early endosome                                            | 2 | 25 | 179  | 14857 | 0.08 | 0.012048193 | 6.64        | 3791;2697KDR;GJA1   | 0.036119894 | 0.110542274 | cellular_component |                    |
| GO:0003677 | DNA binding                                               | 6 | 25 | 1264 | 12391 | 0.24 | 0.102009523 | 2.352721519 | 1;196;7153;AHR;TOP  | 0.036212227 | 0.069247943 | molecular_function |                    |
| GO:0002102 | podosome                                                  | 1 | 25 | 22   | 14857 | 0.04 | 0.001480783 | 27.01272727 | 5599                | MAPK8       | 0.036398066 | 0.110542274        | cellular_component |
| GO:0030687 | preribosome, large subunit precursor                      | 1 | 25 | 22   | 14857 | 0.04 | 0.001480783 | 27.01272727 | 3692                | EIF6        | 0.036398066 | 0.110542274        | cellular_component |
| GO:0040018 | positive regulation of multicellular organism growth      | 1 | 25 | 20   | 13332 | 0.04 | 0.00150015  | 26.664      | 1813                | DRD2        | 0.036868918 | 0.056636934        | biological_process |
| GO:0007616 | long-term memory                                          | 1 | 25 | 20   | 13332 | 0.04 | 0.00150015  | 26.664      | 1813                | DRD2        | 0.036868918 | 0.056636934        | biological_process |
| GO:0046676 | negative regulation of insulin secretion                  | 1 | 25 | 20   | 13332 | 0.04 | 0.00150015  | 26.664      | 1813                | DRD2        | 0.036868918 | 0.056636934        | biological_process |
| GO:0003091 | renal water homeostasis                                   | 1 | 25 | 20   | 13332 | 0.04 | 0.00150015  | 26.664      | 231                 | AKR1B1      | 0.036868918 | 0.056636934        | biological_process |
| GO:0001890 | placenta development                                      | 1 | 25 | 20   | 13332 | 0.04 | 0.00150015  | 26.664      | 1432                | MAPK14      | 0.036868918 | 0.056636934        | biological_process |
| GO:0051482 | ion concentration involved in phospholipase C-activated   | 1 | 25 | 20   | 13332 | 0.04 | 0.00150015  | 26.664      | 1813                | DRD2        | 0.036868918 | 0.056636934        | biological_process |
| GO:0048661 | positive regulation of smooth muscle cell proliferation   | 1 | 25 | 20   | 13332 | 0.04 | 0.00150015  | 26.664      | 231                 | AKR1B1      | 0.036868918 | 0.056636934        | biological_process |
| GO:0035255 | ionotropic glutamate receptor binding                     | 1 | 25 | 19   | 12391 | 0.04 | 0.001533371 | 26.08631579 | 1813                | DRD2        | 0.037672958 | 0.070799181        | molecular_function |
| GO:0007608 | sensory perception of smell                               | 1 | 25 | 21   | 13332 | 0.04 | 0.001575158 | 25.39428571 | 1813                | DRD2        | 0.038677683 | 0.05793628         | biological_process |
| GO:0002931 | response to ischemia                                      | 1 | 25 | 21   | 13332 | 0.04 | 0.001575158 | 25.39428571 | 2697                | GJA1        | 0.038677683 | 0.05793628         | biological_process |
| GO:0071479 | cellular response to ionizing radiation                   | 1 | 25 | 21   | 13332 | 0.04 | 0.001575158 | 25.39428571 | 1432                | MAPK14      | 0.038677683 | 0.05793628         | biological_process |
| GO:0032720 | negative regulation of tumor necrosis factor production   | 1 | 25 | 21   | 13332 | 0.04 | 0.001575158 | 25.39428571 | 1139                | CHRNA7      | 0.038677683 | 0.05793628         | biological_process |
| GO:0009411 | response to UV                                            | 1 | 25 | 21   | 13332 | 0.04 | 0.001575158 | 25.39428571 | 5599                | MAPK8       | 0.038677683 | 0.05793628         | biological_process |
| GO:0002027 | regulation of heart rate                                  | 1 | 25 | 21   | 13332 | 0.04 | 0.001575158 | 25.39428571 | 1813                | DRD2        | 0.038677683 | 0.05793628         | biological_process |
| GO:0046875 | ephrin receptor binding                                   | 1 | 25 | 20   | 12391 | 0.04 | 0.001614075 | 24.782      | 5294                | PIK3CG      | 0.039617525 | 0.071902488        | molecular_function |
| GO:0001205 | activity, RNA polymerase II distal enhancer sequence      | 1 | 25 | 20   | 12391 | 0.04 | 0.001614075 | 24.782      | 4780                | NFE2L2      | 0.039617525 | 0.071902488        | molecular_function |
| GO:0000287 | magnesium ion binding                                     | 2 | 25 | 159  | 12391 | 0.08 | 0.012831894 | 6.234465409 | 7153;5728OP2A;PTE   | 0.040476668 | 0.071902488 | molecular_function |                    |
| GO:0042110 | T cell activation                                         | 1 | 25 | 22   | 13332 | 0.04 | 0.001650165 | 24.24       | 5294                | PIK3CG      | 0.040483186 | 0.059895206        | biological_process |
| GO:0050808 | synapse organization                                      | 1 | 25 | 22   | 13332 | 0.04 | 0.001650165 | 24.24       | 1139                | CHRNA7      | 0.040483186 | 0.059895206        | biological_process |
| GO:0018108 | peptidyl-tyrosine phosphorylation                         | 1 | 25 | 22   | 13332 | 0.04 | 0.001650165 | 24.24       | 3791                | KDR         | 0.040483186 | 0.059895206        | biological_process |
| GO:0032993 | protein-DNA complex                                       | 1 | 25 | 25   | 14857 | 0.04 | 0.001682708 | 23.7712     | 4780                | NFE2L2      | 0.041261785 | 0.120838085        | cellular_component |
| GO:0006955 | immune response                                           | 2 | 25 | 173  | 13332 | 0.08 | 0.012976298 | 6.165086705 | 6590;3565           | SLPI;IL4    | 0.041316898 | 0.060879184        | biological_process |
| GO:0016303 | 1-phosphatidylinositol-3-kinase activity                  | 1 | 25 | 21   | 12391 | 0.04 | 0.001694778 | 23.60190476 | 5294                | PIK3CG      | 0.041558319 | 0.071902488        | molecular_function |
| GO:0017025 | TBP-class protein binding                                 | 1 | 25 | 21   | 12391 | 0.04 | 0.001694778 | 23.60190476 | 196                 | AHR         | 0.041558319 | 0.071902488        | molecular_function |
| GO:0032870 | cellular response to hormone stimulus                     | 1 | 25 | 23   | 13332 | 0.04 | 0.001725173 | 23.18608696 | 10499               | NCOA2       | 0.042285434 | 0.061552588        | biological_process |
| GO:0002088 | lens development in camera-type eye                       | 1 | 25 | 23   | 13332 | 0.04 | 0.001725173 | 23.18608696 | 2697                | GJA1        | 0.042285434 | 0.061552588        | biological_process |
| GO:0034097 | response to cytokine                                      | 1 | 25 | 23   | 13332 | 0.04 | 0.001725173 | 23.18608696 | 9536                | PTGES       | 0.042285434 | 0.061552588        | biological_process |
| GO:0005615 | extracellular space                                       | 4 | 25 | 802  | 14857 | 0.16 | 0.053981288 | 2.963990025 | 7422;6590;1;VEGFA;1 | 0.043174955 | 0.122080906 | cellular_component |                    |
| GO:0046966 | thyroid hormone receptor binding                          | 1 | 25 | 22   | 12391 | 0.04 | 0.001775482 | 22.52909091 | 6256                | RXRA        | 0.043495347 | 0.072938352        | molecular_function |
| GO:0048487 | beta-tubulin binding                                      | 1 | 25 | 22   | 12391 | 0.04 | 0.001775482 | 22.52909091 | 2697                | GJA1        | 0.043495347 | 0.072938352        | molecular_function |
| GO:0002062 | chondrocyte differentiation                               | 1 | 25 | 24   | 13332 | 0.04 | 0.00180018  | 22.22       | 1432                | MAPK14      | 0.044084432 | 0.063404303        | biological_process |
| GO:0001568 | blood vessel development                                  | 1 | 25 | 24   | 13332 | 0.04 | 0.00180018  | 22.22       | 196                 | AHR         | 0.044084432 | 0.063404303        | biological_process |
| GO:0070527 | platelet aggregation                                      | 1 | 25 | 24   | 13332 | 0.04 | 0.00180018  | 22.22       | 5294                | PIK3CG      | 0.044084432 | 0.063404303        | biological_process |
| GO:0007186 | G-protein coupled receptor signaling pathway              | 3 | 25 | 427  | 13332 | 0.12 | 0.032028203 | 3.746697892 | 33;1813;523;DRD2;P  | 0.044530058 | 0.063791076 | biological_process |                    |
| GO:0030424 | axon                                                      | 2 | 25 | 203  | 14857 | 0.08 | 0.013663593 | 5.854975369 | 1813;5599RD2;MAPK   | 0.045365574 | 0.123999235 | cellular_component |                    |
| GO:0001102 | RNA polymerase II activating transcription factor binding | 1 | 25 | 22   | 12391 | 0.04 | 0.001856186 | 21.54056522 | 4780                | NFE2L2      | 0.045478617 | 0.07502605         | molecular_function |

|            |                                                                |   |    |     |       |      |             |             |           |               |             |             |                    |
|------------|----------------------------------------------------------------|---|----|-----|-------|------|-------------|-------------|-----------|---------------|-------------|-------------|--------------------|
| GO:0008219 | cell death                                                     | 1 | 25 | 25  | 13332 | 0.04 | 0.001875188 | 21.3312     | 5733      | PTGER3        | 0.045880186 | 0.065465404 | biological_process |
| GO:0006954 | inflammatory response                                          | 2 | 25 | 185 | 13332 | 0.08 | 0.013876388 | 5.765189189 | 5294;4780 | 3CG;NFE2L2    | 0.046627648 | 0.066270003 | biological_process |
| GO:0004866 | endopeptidase inhibitor activity                               | 1 | 25 | 24  | 12391 | 0.04 | 0.00193689  | 20.65166667 | 6590      | SLPI          | 0.047358136 | 0.076335937 | molecular_function |
| GO:0019904 | protein domain specific binding                                | 2 | 25 | 174 | 12391 | 0.08 | 0.01404245  | 5.697011494 | 10499;478 | (COA2;NFE2L2) | 0.047622419 | 0.076335937 | molecular_function |
| GO:0000910 | cytokinesis                                                    | 1 | 25 | 26  | 13332 | 0.04 | 0.001950195 | 20.51076923 | 332       | BIRC5         | 0.047672701 | 0.066964377 | biological_process |
| GO:0014068 | positive regulation of phosphatidylinositol 3-kinase signaling | 1 | 25 | 26  | 13332 | 0.04 | 0.001950195 | 20.51076923 | 3791      | KDR           | 0.047672701 | 0.066964377 | biological_process |
| GO:0032467 | positive regulation of cytokinesis                             | 1 | 25 | 26  | 13332 | 0.04 | 0.001950195 | 20.51076923 | 1813      | DRD2          | 0.047672701 | 0.066964377 | biological_process |
| GO:0036126 | sperm flagellum                                                | 1 | 25 | 29  | 14857 | 0.04 | 0.001951942 | 20.49241379 | 1813      | DRD2          | 0.047710096 | 0.126200899 | cellular_component |
| GO:0001046 | core promoter sequence-specific DNA binding                    | 1 | 25 | 25  | 12391 | 0.04 | 0.002017593 | 19.8256     | 5468      | PPARG         | 0.04928391  | 0.076742088 | molecular_function |
| GO:0015276 | ligand-gated ion channel activity                              | 1 | 25 | 25  | 12391 | 0.04 | 0.002017593 | 19.8256     | 1139      | CHRNA7        | 0.04928391  | 0.076742088 | molecular_function |
| GO:0030139 | endocytic vesicle                                              | 1 | 25 | 30  | 14857 | 0.04 | 0.00201925  | 19.80933333 | 1813      | DRD2          | 0.049315656 | 0.126371369 | cellular_component |
| GO:0051781 | positive regulation of cell division                           | 1 | 25 | 27  | 13332 | 0.04 | 0.002025203 | 19.75111111 | 7422      | VEGFA         | 0.049461983 | 0.068151816 | biological_process |
| GO:0051592 | response to calcium ion                                        | 1 | 25 | 27  | 13332 | 0.04 | 0.002025203 | 19.75111111 | 9536      | PTGES         | 0.049461983 | 0.068151816 | biological_process |
| GO:0045785 | positive regulation of cell adhesion                           | 1 | 25 | 27  | 13332 | 0.04 | 0.002025203 | 19.75111111 | 7422      | VEGFA         | 0.049461983 | 0.068151816 | biological_process |
| GO:0007631 | feeding behavior                                               | 1 | 25 | 27  | 13332 | 0.04 | 0.002025203 | 19.75111111 | 1813      | DRD2          | 0.049461983 | 0.068151816 | biological_process |
| GO:0014070 | response to organic cyclic compound                            | 1 | 25 | 27  | 13332 | 0.04 | 0.002025203 | 19.75111111 | 9536      | PTGES         | 0.049461983 | 0.068151816 | biological_process |
| GO:0046934 | phosphatidylinositol-4,5-bisphosphate 3-kinase activity        | 1 | 25 | 26  | 12391 | 0.04 | 0.002098297 | 19.06307692 | 5294      | PIK3CG        | 0.051205946 | 0.077520113 | molecular_function |
| GO:0070888 | E-box binding                                                  | 1 | 25 | 26  | 12391 | 0.04 | 0.002098297 | 19.06307692 | 196       | AHR           | 0.051205946 | 0.077520113 | molecular_function |
| GO:0032024 | positive regulation of insulin secretion                       | 1 | 25 | 28  | 13332 | 0.04 | 0.00210021  | 19.04571429 | 2697      | GJA1          | 0.051248037 | 0.070344263 | biological_process |
| GO:0006366 | transcription from RNA polymerase II promoter                  | 2 | 25 | 198 | 13332 | 0.08 | 0.014851485 | 5.386666667 | 196;4780  | HR;NFE2L2     | 0.052650521 | 0.071995599 | biological_process |
| GO:0008542 | visual learning                                                | 1 | 25 | 29  | 13332 | 0.04 | 0.002175218 | 18.38896552 | 1813      | DRD2          | 0.053030869 | 0.072242052 | biological_process |
| GO:0005881 | cytoplasmic microtubule                                        | 1 | 25 | 33  | 14857 | 0.04 | 0.002221175 | 18.00848485 | 332       | BIRC5         | 0.05411676  | 0.134471949 | cellular_component |
| GO:0006110 | regulation of glycolytic process                               | 1 | 25 | 30  | 13332 | 0.04 | 0.002250225 | 17.776      | 3692      | EIF6          | 0.054810485 | 0.073013229 | biological_process |
| GO:0042149 | cellular response to glucose starvation                        | 1 | 25 | 30  | 13332 | 0.04 | 0.002250225 | 17.776      | 4780      | NFE2L2        | 0.054810485 | 0.073013229 | biological_process |
| GO:0007611 | learning or memory                                             | 1 | 25 | 30  | 13332 | 0.04 | 0.002250225 | 17.776      | 1139      | CHRNA7        | 0.054810485 | 0.073013229 | biological_process |
| GO:0045600 | positive regulation of fat cell differentiation                | 1 | 25 | 30  | 13332 | 0.04 | 0.002250225 | 17.776      | 5468      | PPARG         | 0.054810485 | 0.073013229 | biological_process |
| GO:0071320 | cellular response to cAMP                                      | 1 | 25 | 30  | 13332 | 0.04 | 0.002250225 | 17.776      | 5294      | PIK3CG        | 0.054810485 | 0.073013229 | biological_process |
| GO:0009612 | response to mechanical stimulus                                | 1 | 25 | 30  | 13332 | 0.04 | 0.002250225 | 17.776      | 5599      | MAPK8         | 0.054810485 | 0.073013229 | biological_process |
| GO:0043021 | ribonucleoprotein complex binding                              | 1 | 25 | 28  | 12391 | 0.04 | 0.002259705 | 17.70142857 | 7155      | TOP2B         | 0.055038834 | 0.082181273 | molecular_function |
| GO:0048813 | dendrite morphogenesis                                         | 1 | 25 | 31  | 13332 | 0.04 | 0.002325233 | 17.20258065 | 5599      | MAPK8         | 0.05658689  | 0.074283153 | biological_process |
| GO:0038083 | peptidyl-tyrosine autophosphorylation                          | 1 | 25 | 31  | 13332 | 0.04 | 0.002325233 | 17.20258065 | 3791      | KDR           | 0.05658689  | 0.074283153 | biological_process |
| GO:0031098 | stress-activated protein kinase signaling cascade              | 1 | 25 | 31  | 13332 | 0.04 | 0.002325233 | 17.20258065 | 231       | AKR1B1        | 0.05658689  | 0.074283153 | biological_process |
| GO:0030900 | forebrain development                                          | 1 | 25 | 31  | 13332 | 0.04 | 0.002325233 | 17.20258065 | 7155      | TOP2B         | 0.05658689  | 0.074283153 | biological_process |
| GO:0050890 | cognition                                                      | 1 | 25 | 32  | 13332 | 0.04 | 0.00240024  | 16.665      | 1139      | CHRNA7        | 0.058360089 | 0.076057733 | biological_process |
| GO:0006950 | response to stress                                             | 1 | 25 | 32  | 13332 | 0.04 | 0.00240024  | 16.665      | 231       | AKR1B1        | 0.058360089 | 0.076057733 | biological_process |
| GO:0060170 | ciliary membrane                                               | 1 | 25 | 36  | 14857 | 0.04 | 0.0024231   | 16.50777778 | 1813      | DRD2          | 0.058894582 | 0.141700768 | cellular_component |
| GO:0045071 | negative regulation of viral genome replication                | 1 | 25 | 33  | 13332 | 0.04 | 0.002475248 | 16.16       | 6590      | SLPI          | 0.060130089 | 0.077802732 | biological_process |
| GO:0034198 | cellular response to amino acid starvation                     | 1 | 25 | 33  | 13332 | 0.04 | 0.002475248 | 16.16       | 5599      | MAPK8         | 0.060130089 | 0.077802732 | biological_process |
| GO:0014704 | intercalated disc                                              | 1 | 25 | 37  | 14857 | 0.04 | 0.002490409 | 16.06162162 | 2697      | GJA1          | 0.060482035 | 0.141700768 | cellular_component |
| GO:0001085 | RNA polymerase II transcription factor binding                 | 1 | 25 | 31  | 12391 | 0.04 | 0.002501816 | 15.9883871  | 2002      | ELK1          | 0.060760308 | 0.089498291 | molecular_function |
| GO:0045669 | positive regulation of osteoblast differentiation              | 1 | 25 | 34  | 13332 | 0.04 | 0.002550255 | 15.68470588 | 2697      | GJA1          | 0.061896895 | 0.079802782 | biological_process |
| GO:0008138 | protein tyrosine/serine/threoninephosphatase activity          | 1 | 25 | 32  | 12391 | 0.04 | 0.00258252  | 15.48875    | 5728      | PTEN          | 0.062660064 | 0.09106596  | molecular_function |
| GO:0001570 | vasculogenesis                                                 | 1 | 25 | 35  | 13332 | 0.04 | 0.002625263 | 15.23657143 | 3791      | KDR           | 0.063660511 | 0.08092058  | biological_process |
| GO:0006006 | glucose metabolic process                                      | 1 | 25 | 35  | 13332 | 0.04 | 0.002625263 | 15.23657143 | 1432      | MAPK14        | 0.063660511 | 0.08092058  | biological_process |
| GO:0032868 | response to insulin                                            | 1 | 25 | 35  | 13332 | 0.04 | 0.002625263 | 15.23657143 | 3692      | EIF6          | 0.063660511 | 0.08092058  | biological_process |
| GO:0071260 | cellular response to mechanical stimulus                       | 1 | 25 | 35  | 13332 | 0.04 | 0.002625263 | 15.23657143 | 2697      | GJA1          | 0.063660511 | 0.08092058  | biological_process |
| GO:0015459 | potassium channel regulator activity                           | 1 | 25 | 33  | 12391 | 0.04 | 0.002663223 | 15.01939394 | 1813      | DRD2          | 0.064556132 | 0.091384654 | molecular_function |
| GO:0000976 | transcription regulatory region sequence-specific DNA binding  | 1 | 25 | 33  | 12391 | 0.04 | 0.002663223 | 15.01939394 | 4780      | NFE2L2        | 0.064556132 | 0.091384654 | molecular_function |
| GO:0035580 | specific granule lumen                                         | 1 | 25 | 40  | 14857 | 0.04 | 0.002692334 | 14.857      | 6590      | SLPI          | 0.065228984 | 0.148577131 | cellular_component |
| GO:0030968 | endoplasmic reticulum unfolded protein response                | 1 | 25 | 36  | 13332 | 0.04 | 0.00270027  | 14.81333333 | 4780      | NFE2L2        | 0.065470045 | 0.087003338 | biological_process |

|            |                                                                |    |    |      |       |      |             |             |             |          |             |             |                    |
|------------|----------------------------------------------------------------|----|----|------|-------|------|-------------|-------------|-------------|----------|-------------|-------------|--------------------|
| GO:0007254 | JNK cascade                                                    | 1  | 25 | 36   | 13332 | 0.04 | 0.00270027  | 14.81333333 | 5599        | MAPK8    | 0.065420945 | 0.082003338 | biological_process |
| GO:0033138 | positive regulation of peptidyl-serine phosphorylation         | 1  | 25 | 36   | 13332 | 0.04 | 0.00270027  | 14.81333333 | 7422        | VEGFA    | 0.065420945 | 0.082003338 | biological_process |
| GO:0007519 | skeletal muscle tissue development                             | 1  | 25 | 36   | 13332 | 0.04 | 0.00270027  | 14.81333333 | 1432        | MAPK14   | 0.065420945 | 0.082003338 | biological_process |
| GO:0000980 | polymerase II distal enhancer sequence-specific DNA            | 1  | 25 | 34   | 12391 | 0.04 | 0.002743927 | 14.57764706 | 4780        | NFE2L2   | 0.066448517 | 0.092857543 | molecular_function |
| GO:0007613 | memory                                                         | 1  | 25 | 37   | 13332 | 0.04 | 0.002775278 | 14.41297297 | 1139        | CHRNA7   | 0.067178201 | 0.083337906 | biological_process |
| GO:0043154 | inhibition of cysteine-type endopeptidase activity involved in | 1  | 25 | 37   | 13332 | 0.04 | 0.002775278 | 14.41297297 | 332         | BIRC5    | 0.067178201 | 0.083337906 | biological_process |
| GO:0009749 | response to glucose                                            | 1  | 25 | 37   | 13332 | 0.04 | 0.002775278 | 14.41297297 | 2697        | GJA1     | 0.067178201 | 0.083337906 | biological_process |
| GO:0045727 | positive regulation of translation                             | 1  | 25 | 38   | 13332 | 0.04 | 0.002850285 | 14.03368421 | 3692        | EIF6     | 0.068932285 | 0.084930222 | biological_process |
| GO:0048812 | neuron projection morphogenesis                                | 1  | 25 | 38   | 13332 | 0.04 | 0.002850285 | 14.03368421 | 2697        | GJA1     | 0.068932285 | 0.084930222 | biological_process |
| GO:0042733 | embryonic digit morphogenesis                                  | 1  | 25 | 39   | 13332 | 0.04 | 0.002925293 | 13.67384615 | 2697        | GJA1     | 0.070683202 | 0.086204851 | biological_process |
| GO:0045652 | regulation of megakaryocyte differentiation                    | 1  | 25 | 39   | 13332 | 0.04 | 0.002925293 | 13.67384615 | 3692        | EIF6     | 0.070683202 | 0.086204851 | biological_process |
| GO:0032880 | regulation of protein localization                             | 1  | 25 | 39   | 13332 | 0.04 | 0.002925293 | 13.67384615 | 5599        | MAPK8    | 0.070683202 | 0.086204851 | biological_process |
| GO:0030425 | dendrite                                                       | 2  | 25 | 261  | 14857 | 0.08 | 0.017567477 | 4.553869732 | 1813;2002   | DRD2;ELK | 0.070792221 | 0.153040498 | cellular_component |
| GO:0006468 | protein phosphorylation                                        | 2  | 25 | 235  | 13332 | 0.08 | 0.017626763 | 4.538553191 | 332;5599    | RC5;MAP1 | 0.07119272  | 0.086533912 | biological_process |
| GO:0030145 | manganese ion binding                                          | 1  | 25 | 37   | 12391 | 0.04 | 0.002986038 | 13.39567568 | 6648        | SOD2     | 0.072103648 | 0.09948478  | molecular_function |
| GO:0002244 | hematopoietic progenitor cell differentiation                  | 1  | 25 | 40   | 13332 | 0.04 | 0.0030003   | 13.332      | 7153        | TOP2A    | 0.072430958 | 0.087743543 | biological_process |
| GO:0015631 | tubulin binding                                                | 1  | 25 | 38   | 12391 | 0.04 | 0.003066742 | 13.04315789 | 332         | BIRC5    | 0.073981372 | 0.10079962  | molecular_function |
| GO:0000902 | cell morphogenesis                                             | 1  | 25 | 41   | 13332 | 0.04 | 0.003075308 | 13.00682927 | 1432        | MAPK14   | 0.074175558 | 0.089257922 | biological_process |
| GO:0050731 | positive regulation of peptidyl-tyrosine phosphorylation       | 1  | 25 | 41   | 13332 | 0.04 | 0.003075308 | 13.00682927 | 7422        | VEGFA    | 0.074175558 | 0.089257922 | biological_process |
| GO:0005829 | cytosol                                                        | 10 | 25 | 3743 | 14857 | 0.4  | 0.251935115 | 1.587710393 | 1;3692;5599 | EIF6;MAI | 0.074432014 | 0.153040498 | cellular_component |
| GO:0030141 | secretory granule                                              | 1  | 25 | 46   | 14857 | 0.04 | 0.003096184 | 12.91913043 | 7422        | VEGFA    | 0.074653901 | 0.153040498 | cellular_component |
| GO:0000775 | chromosome, centromeric region                                 | 1  | 25 | 46   | 14857 | 0.04 | 0.003096184 | 12.91913043 | 332         | BIRC5    | 0.074653901 | 0.153040498 | cellular_component |
| GO:0001540 | amyloid-beta binding                                           | 1  | 25 | 39   | 12391 | 0.04 | 0.003147446 | 12.70871795 | 1139        | CHRNA7   | 0.075855449 | 0.100832243 | molecular_function |
| GO:0097110 | scaffold protein binding                                       | 1  | 25 | 39   | 12391 | 0.04 | 0.003147446 | 12.70871795 | 2697        | GJA1     | 0.075855449 | 0.100832243 | molecular_function |
| GO:0007200 | inhibitory G-protein coupled receptor signaling pathway        | 1  | 25 | 42   | 13332 | 0.04 | 0.003150315 | 12.69714286 | 5733        | PTGER3   | 0.075917008 | 0.090748477 | biological_process |
| GO:0006805 | xenobiotic metabolic process                                   | 1  | 25 | 42   | 13332 | 0.04 | 0.003150315 | 12.69714286 | 196         | AHR      | 0.075917008 | 0.090748477 | biological_process |
| GO:0001947 | heart looping                                                  | 1  | 25 | 43   | 13332 | 0.04 | 0.003225323 | 12.40186047 | 2697        | GJA1     | 0.077655313 | 0.092520027 | biological_process |
| GO:0003743 | translation initiation factor activity                         | 1  | 25 | 40   | 12391 | 0.04 | 0.003228149 | 12.391      | 3692        | EIF6     | 0.077725884 | 0.102073751 | molecular_function |
| GO:0043410 | positive regulation of MAPK cascade                            | 1  | 25 | 44   | 13332 | 0.04 | 0.00330033  | 12.12       | 3791        | KDR      | 0.079390479 | 0.094276194 | biological_process |
| GO:0004722 | protein serine/threonine phosphatase activity                  | 1  | 25 | 43   | 12391 | 0.04 | 0.003470261 | 11.52651163 | 5728        | PTEN     | 0.083315409 | 0.107949729 | molecular_function |
| GO:0051259 | protein oligomerization                                        | 1  | 25 | 47   | 13332 | 0.04 | 0.003525353 | 11.34638298 | 2697        | GJA1     | 0.084577194 | 0.099778978 | biological_process |
| GO:0031647 | regulation of protein stability                                | 1  | 25 | 47   | 13332 | 0.04 | 0.003525353 | 11.34638298 | 5728        | PTEN     | 0.084577194 | 0.099778978 | biological_process |
| GO:0019903 | protein phosphatase binding                                    | 1  | 25 | 44   | 12391 | 0.04 | 0.003550964 | 11.26454545 | 1432        | MAPK14   | 0.085171346 | 0.107949729 | molecular_function |
| GO:0043022 | ribosome binding                                               | 1  | 25 | 44   | 12391 | 0.04 | 0.003550964 | 11.26454545 | 3692        | EIF6     | 0.085171346 | 0.107949729 | molecular_function |
| GO:0005887 | integral component of plasma membrane                          | 4  | 25 | 1018 | 14857 | 0.16 | 0.06851989  | 2.335088409 | 1;2697;5733 | A1;PTGEF | 0.087932722 | 0.174863086 | cellular_component |
| GO:0006816 | calcium ion transport                                          | 1  | 25 | 49   | 13332 | 0.04 | 0.003675368 | 10.88326531 | 1139        | CHRNA7   | 0.088019407 | 0.103165603 | biological_process |
| GO:0018107 | peptidyl-threonine phosphorylation                             | 1  | 25 | 49   | 13332 | 0.04 | 0.003675368 | 10.88326531 | 5599        | MAPK8    | 0.088019407 | 0.103165603 | biological_process |
| GO:0034599 | cellular response to oxidative stress                          | 1  | 25 | 50   | 13332 | 0.04 | 0.003750375 | 10.6656     | 4780        | NFE2L2   | 0.08973585  | 0.104837029 | biological_process |
| GO:0005739 | mitochondrion                                                  | 4  | 25 | 1031 | 14857 | 0.16 | 0.069394898 | 2.305645005 | 1;2697;5599 | GJA1;MAI | 0.091170159 | 0.174863086 | cellular_component |
| GO:0001503 | ossification                                                   | 1  | 25 | 51   | 13332 | 0.04 | 0.003825383 | 10.45647059 | 5599        | MAPK8    | 0.091449192 | 0.105811404 | biological_process |
| GO:0045732 | positive regulation of protein catabolic process               | 1  | 25 | 51   | 13332 | 0.04 | 0.003825383 | 10.45647059 | 2697        | GJA1     | 0.091449192 | 0.105811404 | biological_process |
| GO:0007626 | locomotory behavior                                            | 1  | 25 | 51   | 13332 | 0.04 | 0.003825383 | 10.45647059 | 1813        | DRD2     | 0.091449192 | 0.105811404 | biological_process |
| GO:0030672 | synaptic vesicle membrane                                      | 1  | 25 | 57   | 14857 | 0.04 | 0.003836575 | 10.42596491 | 1813        | DRD2     | 0.091696497 | 0.174863086 | cellular_component |
| GO:0000978 | polymerase II proximal promoter sequence-specific DNA          | 2  | 25 | 254  | 12391 | 0.08 | 0.020498749 | 3.902677165 | 10499;2002  | COA2;ELK | 0.092273357 | 0.115606849 | molecular_function |
| GO:0045454 | cell redox homeostasis                                         | 1  | 25 | 52   | 13332 | 0.04 | 0.00390039  | 10.25538462 | 4780        | NFE2L2   | 0.093159437 | 0.107103684 | biological_process |
| GO:0008104 | protein localization                                           | 1  | 25 | 52   | 13332 | 0.04 | 0.00390039  | 10.25538462 | 1813        | DRD2     | 0.093159437 | 0.107103684 | biological_process |
| GO:0009055 | electron transfer activity                                     | 1  | 25 | 49   | 12391 | 0.04 | 0.003954483 | 10.11510204 | 231         | AKR1B1   | 0.094397054 | 0.116923623 | molecular_function |
| GO:0000785 | chromatin                                                      | 1  | 25 | 59   | 14857 | 0.04 | 0.003971192 | 10.07254237 | 4780        | NFE2L2   | 0.094762601 | 0.17660303  | cellular_component |
| GO:0007416 | synapse assembly                                               | 1  | 25 | 53   | 13332 | 0.04 | 0.003975398 | 10.06188679 | 1813        | DRD2     | 0.094866592 | 0.108720126 | biological_process |
| GO:0005262 | calcium channel activity                                       | 1  | 25 | 51   | 12391 | 0.04 | 0.004115891 | 9.718431372 | 1139        | CHRNA7   | 0.098062777 | 0.120008737 | molecular_function |

|            |                                                             |   |    |      |       |      |             |             |                     |             |             |                    |                    |
|------------|-------------------------------------------------------------|---|----|------|-------|------|-------------|-------------|---------------------|-------------|-------------|--------------------|--------------------|
| GO:0030168 | platelet activation                                         | 1 | 25 | 56   | 13332 | 0.04 | 0.00420042  | 9.522857143 | 5294                | PIK3CG      | 0.099969564 | 0.114205737        | biological_process |
| GO:0043130 | ubiquitin binding                                           | 1 | 25 | 53   | 12391 | 0.04 | 0.004277298 | 9.351698113 | 7153                | TOP2A       | 0.101713246 | 0.123186043        | molecular_function |
| GO:0016605 | PML body                                                    | 1 | 25 | 64   | 14857 | 0.04 | 0.004307734 | 9.285625    | 5728                | PTEN        | 0.102384454 | 0.186567228        | cellular_component |
| GO:0007169 | membrane receptor protein tyrosine kinase signaling pathway | 1 | 25 | 59   | 13332 | 0.04 | 0.004425443 | 9.038644068 | 3791                | KDR         | 0.105044912 | 0.119625278        | biological_process |
| GO:0071222 | cellular response to lipopolysaccharide                     | 1 | 25 | 60   | 13332 | 0.04 | 0.00450045  | 8.888       | 5599                | MAPK8       | 0.106730581 | 0.120782883        | biological_process |
| GO:0019216 | regulation of lipid metabolic process                       | 1 | 25 | 60   | 13332 | 0.04 | 0.00450045  | 8.888       | 10499               | NCOA2       | 0.106730581 | 0.120782883        | biological_process |
| GO:0005794 | Golgi apparatus                                             | 3 | 25 | 688  | 14857 | 0.12 | 0.046308138 | 2.591337209 | 91;2697;47;GJA1;NF  | 0.107011862 | 0.190760275 | cellular_component |                    |
| GO:0004674 | protein serine/threonine kinase activity                    | 2 | 25 | 281  | 12391 | 0.08 | 0.02267775  | 3.527686833 | 5294;5599;3CG;MAF   | 0.109362111 | 0.130994177 | molecular_function |                    |
| GO:0045087 | innate immune response                                      | 2 | 25 | 303  | 13332 | 0.08 | 0.022727273 | 3.52        | 5294;6590;IK3CG;SL  | 0.109770587 | 0.123834943 | biological_process |                    |
| GO:0007165 | signal transduction                                         | 3 | 25 | 628  | 13332 | 0.12 | 0.04710471  | 2.547515924 | 39;2697;95A7;GJA1;J | 0.111181097 | 0.124918649 | biological_process |                    |
| GO:0007568 | aging                                                       | 1 | 25 | 63   | 13332 | 0.04 | 0.004725473 | 8.464761905 | 4780                | NFE2L2      | 0.111769318 | 0.124918649        | biological_process |
| GO:0000187 | activation of MAPK activity                                 | 1 | 25 | 63   | 13332 | 0.04 | 0.004725473 | 8.464761905 | 1139                | CHRNA7      | 0.111769318 | 0.124918649        | biological_process |
| GO:0035556 | intracellular signal transduction                           | 2 | 25 | 308  | 13332 | 0.08 | 0.02310231  | 3.462857143 | 1432;1813;APK14;DR  | 0.112797695 | 0.125678914 | biological_process |                    |
| GO:0006661 | phosphatidylinositol biosynthetic process                   | 1 | 25 | 64   | 13332 | 0.04 | 0.00480048  | 8.3325      | 5294                | PIK3CG      | 0.113442825 | 0.126008799        | biological_process |
| GO:0005882 | intermediate filament                                       | 1 | 25 | 72   | 14857 | 0.04 | 0.0048462   | 8.253888889 | 2697                | GJA1        | 0.114451433 | 0.199681223        | cellular_component |
| GO:0004713 | protein tyrosine kinase activity                            | 1 | 25 | 62   | 12391 | 0.04 | 0.005003632 | 7.994193548 | 3791                | KDR         | 0.117967793 | 0.139766189        | molecular_function |
| GO:0001649 | osteoblast differentiation                                  | 1 | 25 | 67   | 13332 | 0.04 | 0.005025503 | 7.959402985 | 2697                | GJA1        | 0.118445205 | 0.131161714        | biological_process |
| GO:0051897 | positive regulation of protein kinase B signaling           | 1 | 25 | 68   | 13332 | 0.04 | 0.00510051  | 7.842352941 | 5294                | PIK3CG      | 0.120106635 | 0.132594786        | biological_process |
| GO:0001669 | acrosomal vesicle                                           | 1 | 25 | 79   | 14857 | 0.04 | 0.005317359 | 7.522531646 | 1813                | DRD2        | 0.124882154 | 0.213340347        | cellular_component |
| GO:0006470 | protein dephosphorylation                                   | 1 | 25 | 71   | 13332 | 0.04 | 0.005325533 | 7.510985915 | 5728                | PTEN        | 0.125072908 | 0.137656463        | biological_process |
| GO:0005178 | integrin binding                                            | 1 | 25 | 67   | 12391 | 0.04 | 0.00540715  | 7.39761194  | 3791                | KDR         | 0.126875696 | 0.148703773        | molecular_function |
| GO:0030308 | negative regulation of cell growth                          | 1 | 25 | 73   | 13332 | 0.04 | 0.005475548 | 7.305205479 | 2697                | GJA1        | 0.128368796 | 0.140854515        | biological_process |
| GO:0043197 | dendritic spine                                             | 1 | 25 | 83   | 14857 | 0.04 | 0.005586592 | 7.16        | 1813                | DRD2        | 0.130789504 | 0.216906972        | cellular_component |
| GO:0008270 | zinc ion binding                                            | 3 | 25 | 629  | 12391 | 0.12 | 0.05076265  | 2.363942766 | 12;5468;625;PPARG;I | 0.131211306 | 0.15214928  | molecular_function |                    |
| GO:0010976 | positive regulation of neuron projection development        | 1 | 25 | 75   | 13332 | 0.04 | 0.005625563 | 7.1104      | 4780                | NFE2L2      | 0.131652763 | 0.144020143        | biological_process |
| GO:0000777 | condensed chromosome kinetochore                            | 1 | 25 | 84   | 14857 | 0.04 | 0.005653901 | 7.074761905 | 332                 | BIRC5       | 0.132260349 | 0.216906972        | cellular_component |
| GO:0004725 | protein tyrosine phosphatase activity                       | 1 | 25 | 72   | 12391 | 0.04 | 0.005810669 | 6.883888889 | 5728                | PTEN        | 0.1356972   | 0.155694682        | molecular_function |
| GO:0007417 | central nervous system development                          | 1 | 25 | 79   | 13332 | 0.04 | 0.005925593 | 6.750379747 | 5728                | PTEN        | 0.138185098 | 0.149804266        | biological_process |
| GO:0006936 | muscle contraction                                          | 1 | 25 | 79   | 13332 | 0.04 | 0.005925593 | 6.750379747 | 2697                | GJA1        | 0.138185098 | 0.149804266        | biological_process |
| GO:0005975 | carbohydrate metabolic process                              | 1 | 25 | 79   | 13332 | 0.04 | 0.005925593 | 6.750379747 | 231                 | AKR1B1      | 0.138185098 | 0.149804266        | biological_process |
| GO:0004867 | serine-type endopeptidase inhibitor activity                | 1 | 25 | 74   | 12391 | 0.04 | 0.005972077 | 6.697837838 | 6590                | SLPI        | 0.13920179  | 0.158052032        | molecular_function |
| GO:0043204 | perikaryon                                                  | 1 | 25 | 89   | 14857 | 0.04 | 0.005990442 | 6.677303371 | 1813                | DRD2        | 0.139578805 | 0.224420823        | cellular_component |
| GO:0000922 | spindle pole                                                | 1 | 25 | 91   | 14857 | 0.04 | 0.006125059 | 6.530549451 | 1432                | MAPK14      | 0.142489564 | 0.224695082        | cellular_component |
| GO:0045892 | negative regulation of transcription, DNA-templated         | 2 | 25 | 358  | 13332 | 0.08 | 0.026852685 | 2.979217877 | 332;196             | BIRC5;AHI   | 0.144206341 | 0.15586374         | biological_process |
| GO:0000086 | G2/M transition of mitotic cell cycle                       | 1 | 25 | 83   | 13332 | 0.04 | 0.006225623 | 6.425060241 | 332                 | BIRC5       | 0.144670245 | 0.155898383        | biological_process |
| GO:0006811 | ion transport                                               | 1 | 25 | 85   | 13332 | 0.04 | 0.006375638 | 6.273882353 | 1139                | CHRNA7      | 0.147895224 | 0.158899333        | biological_process |
| GO:0006351 | transcription, DNA-templated                                | 5 | 25 | 1565 | 13332 | 0.2  | 0.117386739 | 1.703769968 | 2;10499;545;NCOA2   | 0.162229712 | 0.173783163 | biological_process |                    |
| GO:0005814 | centriole                                                   | 1 | 25 | 105  | 14857 | 0.04 | 0.007067376 | 5.659809524 | 332                 | BIRC5       | 0.162601803 | 0.251572601        | cellular_component |
| GO:0030335 | positive regulation of cell migration                       | 1 | 25 | 95   | 13332 | 0.04 | 0.007125713 | 5.613473684 | 3791                | KDR         | 0.163845803 | 0.174995074        | biological_process |
| GO:0017124 | SH3 domain binding                                          | 1 | 25 | 89   | 12391 | 0.04 | 0.007182633 | 5.568988764 | 2697                | GJA1        | 0.165054801 | 0.185473951        | molecular_function |
| GO:0002250 | adaptive immune response                                    | 1 | 25 | 96   | 13332 | 0.04 | 0.00720072  | 5.555       | 5294                | PIK3CG      | 0.165425002 | 0.176160548        | biological_process |
| GO:0042493 | response to drug                                            | 1 | 25 | 98   | 13332 | 0.04 | 0.007350735 | 5.441632653 | 1813                | DRD2        | 0.168574814 | 0.178986788        | biological_process |
| GO:0043123 | positive regulation of I-kappaB kinase/NF-kappaB signaling  | 1 | 25 | 99   | 13332 | 0.04 | 0.007425743 | 5.386666667 | 2697                | GJA1        | 0.170145438 | 0.180124642        | biological_process |
| GO:0003729 | mRNA binding                                                | 1 | 25 | 93   | 12391 | 0.04 | 0.007505448 | 5.329462366 | 6590                | SLPI        | 0.171822031 | 0.191108178        | molecular_function |
| GO:0008201 | heparin binding                                             | 1 | 25 | 95   | 12391 | 0.04 | 0.007666855 | 5.217263158 | 7422                | VEGFA       | 0.17518587  | 0.192881413        | molecular_function |
| GO:0048471 | perinuclear region of cytoplasm                             | 2 | 25 | 454  | 14857 | 0.08 | 0.030557986 | 2.617973586 | 231;9536            | RIB1;PTC    | 0.176879492 | 0.268176505        | cellular_component |
| GO:0090090 | negative regulation of canonical Wnt signaling pathway      | 1 | 25 | 105  | 13332 | 0.04 | 0.007875788 | 5.078857143 | 1432                | MAPK14      | 0.179509531 | 0.189482283        | biological_process |
| GO:0042802 | identical protein binding                                   | 3 | 25 | 739  | 12391 | 0.12 | 0.059640061 | 2.012070365 | 91;5294;18;PIK3CG;I | 0.18467178  | 0.20129224  | molecular_function |                    |
| GO:0005635 | nuclear envelope                                            | 1 | 25 | 121  | 14857 | 0.04 | 0.008144309 | 4.911404959 | 5733                | PTGER3      | 0.185032763 | 0.268176505        | cellular_component |
| GO:0030496 | midbody                                                     | 1 | 25 | 121  | 14857 | 0.04 | 0.008144309 | 4.911404959 | 332                 | BIRC5       | 0.185032763 | 0.268176505        | cellular_component |

|            |                                                     |   |    |      |       |      |             |             |             |          |             |             |                    |
|------------|-----------------------------------------------------|---|----|------|-------|------|-------------|-------------|-------------|----------|-------------|-------------|--------------------|
| GO:0005741 | mitochondrial outer membrane                        | 1 | 25 | 122  | 14857 | 0.04 | 0.008211617 | 4.871147541 | 2697        | GJA1     | 0.186415375 | 0.268176505 | cellular_component |
| GO:0001701 | in utero embryonic development                      | 1 | 25 | 110  | 13332 | 0.04 | 0.008250825 | 4.848       | 2697        | GJA1     | 0.187235375 | 0.197061138 | biological_process |
| GO:0006897 | endocytosis                                         | 1 | 25 | 111  | 13332 | 0.04 | 0.008325833 | 4.804324324 | 5294        | PIK3CG   | 0.188772141 | 0.198100997 | biological_process |
| GO:0005667 | transcription factor complex                        | 1 | 25 | 127  | 14857 | 0.04 | 0.008548159 | 4.679370079 | 196         | AHR      | 0.19329473  | 0.269655378 | cellular_component |
| GO:0005886 | plasma membrane                                     | 7 | 25 | 2870 | 14857 | 0.28 | 0.193174934 | 1.449463415 | 97;5733;47  | PTGER3;N | 0.194020333 | 0.269655378 | cellular_component |
| GO:0046777 | protein autophosphorylation                         | 1 | 25 | 117  | 13332 | 0.04 | 0.008775878 | 4.557948718 | 3791        | KDR      | 0.197934321 | 0.207113884 | biological_process |
| GO:0006810 | transport                                           | 1 | 25 | 118  | 13332 | 0.04 | 0.008850885 | 4.519322034 | 2697        | GJA1     | 0.199451661 | 0.208098409 | biological_process |
| GO:0016477 | cell migration                                      | 1 | 25 | 125  | 13332 | 0.04 | 0.009375938 | 4.26624     | 5728        | PTEN     | 0.209996141 | 0.218468608 | biological_process |
| GO:0030198 | extracellular matrix organization                   | 1 | 25 | 135  | 13332 | 0.04 | 0.010126013 | 3.950222222 | 3791        | KDR      | 0.224828674 | 0.233227446 | biological_process |
| GO:0016055 | Wnt signaling pathway                               | 1 | 25 | 136  | 13332 | 0.04 | 0.01020102  | 3.921176471 | 1813        | DRD2     | 0.226297135 | 0.234078125 | biological_process |
| GO:0005764 | lysosome                                            | 1 | 25 | 157  | 14857 | 0.04 | 0.010567409 | 3.78522293  | 2697        | GJA1     | 0.233412876 | 0.318997597 | cellular_component |
| GO:0006974 | cellular response to DNA damage stimulus            | 1 | 25 | 145  | 13332 | 0.04 | 0.010876088 | 3.677793103 | 7153        | TOP2A    | 0.23939366  | 0.246917461 | biological_process |
| GO:0014069 | postsynaptic density                                | 1 | 25 | 162  | 14857 | 0.04 | 0.010903951 | 3.668395062 | 1813        | DRD2     | 0.23991022  | 0.322502263 | cellular_component |
| GO:0045211 | postsynaptic membrane                               | 1 | 25 | 172  | 14857 | 0.04 | 0.011577034 | 3.455116279 | 1139        | CHRNA7   | 0.252746668 | 0.328971854 | cellular_component |
| GO:0043005 | neuron projection                                   | 1 | 25 | 172  | 14857 | 0.04 | 0.011577034 | 3.455116279 | 5599        | MAPK8    | 0.252746668 | 0.328971854 | cellular_component |
| GO:0004871 | signal transducer activity                          | 1 | 25 | 147  | 12391 | 0.04 | 0.011863449 | 3.37170068  | 2697        | GJA1     | 0.258181445 | 0.27863146  | molecular_function |
| GO:0043161 | ome-mediated ubiquitin-dependent protein catabolic  | 1 | 25 | 161  | 13332 | 0.04 | 0.012076208 | 3.312298137 | 4780        | NFE2L2   | 0.262152665 | 0.316888094 | biological_process |
| GO:0007267 | cell-cell signaling                                 | 1 | 25 | 168  | 13332 | 0.04 | 0.01260126  | 3.174285714 | 2697        | GJA1     | 0.27190283  | 0.278854891 | biological_process |
| GO:0043065 | positive regulation of apoptotic process            | 1 | 25 | 173  | 13332 | 0.04 | 0.012976298 | 3.082543353 | 7153        | TOP2A    | 0.278791378 | 0.285109596 | biological_process |
| GO:0003713 | transcription coactivator activity                  | 1 | 25 | 162  | 12391 | 0.04 | 0.013074005 | 3.059506173 | 10499       | NCOA2    | 0.280592064 | 0.299848382 | molecular_function |
| GO:0005768 | endosome                                            | 1 | 25 | 195  | 14857 | 0.04 | 0.013125126 | 3.047589744 | 3791        | KDR      | 0.281485504 | 0.360653302 | cellular_component |
| GO:0006355 | regulation of transcription, DNA-templated          | 3 | 25 | 1017 | 13332 | 0.12 | 0.076282628 | 1.573097345 | 68;196;104G | AHR;N    | 0.296978003 | 0.302850449 | biological_process |
| GO:0016324 | apical plasma membrane                              | 1 | 25 | 210  | 14857 | 0.04 | 0.014134751 | 2.829904762 | 2697        | GJA1     | 0.299653304 | 0.377503811 | cellular_component |
| GO:0008017 | microtubule binding                                 | 1 | 25 | 177  | 12391 | 0.04 | 0.014284561 | 2.800225989 | 332         | BIRC5    | 0.302351943 | 0.316888094 | molecular_function |
| GO:0001077 | ctivity, RNA polymerase II proximal promoter sequen | 1 | 25 | 177  | 12391 | 0.04 | 0.014284561 | 2.800225989 | 2002        | ELK1     | 0.302351943 | 0.316888094 | molecular_function |
| GO:0005730 | nucleolus                                           | 2 | 25 | 657  | 14857 | 0.08 | 0.044221579 | 1.809071537 | 3692;7153   | IF6;TOP2 | 0.30384453  | 0.377503811 | cellular_component |
| GO:0016604 | nuclear body                                        | 1 | 25 | 220  | 14857 | 0.04 | 0.014807835 | 2.701272727 | 10499       | NCOA2    | 0.311519282 | 0.381262405 | cellular_component |
| GO:0008134 | transcription factor binding                        | 1 | 25 | 185  | 12391 | 0.04 | 0.014930161 | 2.679135135 | 196         | AHR      | 0.313697411 | 0.325647788 | molecular_function |
| GO:0043025 | neuronal cell body                                  | 1 | 25 | 229  | 14857 | 0.04 | 0.01541391  | 2.59510917  | 2002        | ELK1     | 0.322033445 | 0.388334449 | cellular_component |
| GO:0005789 | endoplasmic reticulum membrane                      | 2 | 25 | 703  | 14857 | 0.08 | 0.047317763 | 1.690697013 | 2697;9536   | JAI;PTGE | 0.332807371 | 0.395510209 | cellular_component |
| GO:0016032 | viral process                                       | 1 | 25 | 217  | 13332 | 0.04 | 0.016276628 | 2.457511521 | 3791        | KDR      | 0.336772002 | 0.342463923 | biological_process |
| GO:0007049 | cell cycle                                          | 1 | 25 | 230  | 13332 | 0.04 | 0.017251725 | 2.318608696 | 196         | AHR      | 0.353027998 | 0.357986257 | biological_process |
| GO:0005925 | focal adhesion                                      | 1 | 25 | 264  | 14857 | 0.04 | 0.017769402 | 2.251060606 | 2697        | GJA1     | 0.36147537  | 0.423442577 | cellular_component |
| GO:0005102 | receptor binding                                    | 1 | 25 | 235  | 12391 | 0.04 | 0.018965378 | 2.109106383 | 2697        | GJA1     | 0.380694669 | 0.391469047 | molecular_function |
| GO:0016607 | nuclear speck                                       | 1 | 25 | 306  | 14857 | 0.04 | 0.020596352 | 1.942091503 | 1432        | MAPK14   | 0.405901698 | 0.465758635 | cellular_component |
| GO:0005759 | mitochondrial matrix                                | 1 | 25 | 309  | 14857 | 0.04 | 0.020798277 | 1.923236246 | 6648        | SOD2     | 0.408958802 | 0.465758635 | cellular_component |
| GO:0051301 | cell division                                       | 1 | 25 | 279  | 13332 | 0.04 | 0.020927093 | 1.911397849 | 332         | BIRC5    | 0.410930302 | 0.415534563 | biological_process |
| GO:0016567 | protein ubiquitination                              | 1 | 25 | 289  | 13332 | 0.04 | 0.021677168 | 1.845259516 | 4780        | NFE2L2   | 0.42211965  | 0.425656965 | biological_process |
| GO:0070062 | extracellular exosome                               | 4 | 25 | 1967 | 14857 | 0.16 | 0.132395504 | 1.208500254 | 3692;2697;1 | EIF6;GJ  | 0.426569087 | 0.479159796 | cellular_component |
| GO:0043312 | neutrophil degranulation                            | 1 | 25 | 314  | 13332 | 0.04 | 0.023552355 | 1.698343949 | 6590        | SLPI     | 0.449207468 | 0.451710017 | biological_process |
| GO:0005813 | centrosome                                          | 1 | 25 | 350  | 14857 | 0.04 | 0.023557919 | 1.697942857 | 4780        | NFE2L2   | 0.44925523  | 0.497823363 | cellular_component |
| GO:0009986 | cell surface                                        | 1 | 25 | 357  | 14857 | 0.04 | 0.024029077 | 1.66464986  | 7422        | VEGFA    | 0.455866054 | 0.498413552 | cellular_component |
| GO:0043565 | sequence-specific DNA binding                       | 1 | 25 | 307  | 12391 | 0.04 | 0.024776047 | 1.614462541 | 6256        | RXRA     | 0.46624556  | 0.47496043  | molecular_function |
| GO:0016020 | membrane                                            | 3 | 25 | 1512 | 14857 | 0.12 | 0.101770209 | 1.179126984 | 22;5294;9A  | PIK3CG   | 0.474986214 | 0.512485126 | cellular_component |
| GO:0000139 | Golgi membrane                                      | 1 | 25 | 429  | 14857 | 0.04 | 0.028875278 | 1.385268065 | 2697        | GJA1     | 0.519587593 | 0.551462036 | cellular_component |
| GO:0005622 | intracellular                                       | 1 | 25 | 435  | 14857 | 0.04 | 0.029279128 | 1.36616092  | 1813        | DRD2     | 0.524561449 | 0.551462036 | cellular_component |
| GO:0043231 | intracellular membrane-bounded organelle            | 1 | 25 | 447  | 14857 | 0.04 | 0.030086828 | 1.329485459 | 2697        | GJA1     | 0.534361264 | 0.554653464 | cellular_component |
| GO:0030154 | cell differentiation                                | 1 | 25 | 432  | 13332 | 0.04 | 0.03240324  | 1.234444444 | 2002        | ELK1     | 0.561436528 | 0.562996074 | biological_process |
| GO:0005576 | extracellular region                                | 2 | 25 | 1153 | 14857 | 0.08 | 0.077606515 | 1.030841284 | 3791;6590   | KDR;SLPI | 0.588356832 | 0.603065753 | cellular_component |
| GO:0000122 | regulation of transcription from RNA polymerase II  | 1 | 25 | 476  | 13332 | 0.04 | 0.02570257  | 1.150236134 | 10499       | NCOA2    | 0.597374125 | 0.597374125 | biological_process |

|            |                                |   |    |      |       |      |             |             |                    |       |             |             |                    |
|------------|--------------------------------|---|----|------|-------|------|-------------|-------------|--------------------|-------|-------------|-------------|--------------------|
| GO:0005783 | endoplasmic reticulum          | 1 | 25 | 712  | 14857 | 0.04 | 0.047923538 | 0.834662921 | 3791               | KDR   | 0.707346452 | 0.716079124 | cellular_component |
| GO:0016021 | integral component of membrane | 3 | 25 | 2780 | 14857 | 0.12 | 0.187117184 | 0.641309353 | 39;5733;957;PTGER3 |       | 0.872631932 | 0.872631932 | cellular_component |
| GO:0003723 | RNA binding                    | 1 | 25 | 1196 | 12391 | 0.04 | 0.096521669 | 0.414414716 | 7153               | TOP2A | 0.921146925 | 0.929676063 | molecular_function |
| GO:0046872 | metal ion binding              | 1 | 25 | 2019 | 12391 | 0.04 | 0.162940844 | 0.245487865 | 7155               | TOP2B | 0.988335825 | 0.988335825 | molecular_function |

---
